# Supplementary material for: Health and Economic Outcomes Associated With Musculoskeletal Disorders Attributable to High Body Mass Index in 192 Countries and Territories in 2019
Source: PubMed Central journal article supplement (PMC9860530; doi:10.1001/jamanetworkopen.2022.50674), 2023-01-20
Supplement: jamanetwopen-e2250674-s001.pdf [file jamanetwopen-e2250674-s001.pdf]

## Supplemental Online Content

Chen N, Fong DYT, Wong JYH. Health and economic outcomes associated with musculoskeletal disorders attributable to high body mass index in 192 countries and territories in 2019. *JAMA Netw Open.* 2023;6(1):e2250674. doi:10.1001/jamanetworkopen.2022.50674

### **eMethods.**

**eTable 1.** Sources or Calculation Methods for the Labor Force

**eTable 2.** Locations With Missing Values, Substitutes, and Income Levels

**eTable 3.** A Summary of Variables in This Study

**eFigure 1.** Study Selection

**eTable 4.** Study Ranking

**eTable 5.** Health Care Costs per Case of Low Back Pain, Gout, and Osteoarthritis in the US

**eFigure 2.** Comparisons of Health Care Costs per Case (US\$)

**eTable 6.** Disease Burden of Low Back Pain, Gout, and Osteoarthritis Attributable to High Body Mass Index by Location in 2019 (Amount, Uncertainty Interval)

**eTable 7.** Disease Burden of Musculoskeletal Disorders Attributable to High Body Mass Index by Sex, Age, and World Bank Income Group, 2019 (Number in Thousands)

**eTable 8.** Health Care, Morbidity-related, and Total Costs of Musculoskeletal Disorders Attributable to High Body Mass Index by Location in 2019

**eTable 9.** Health Care Costs of Low Back Pain Attributable to High Body Mass Index by Location in 2019

**eTable 10.** Health Care Costs of Gout Attributable to High Body Mass Index by Location in 2019

**eTable 11.** Health Care Costs of Osteoarthritis Attributable to High Body Mass Index by Location in 2019

**eTable 12.** Health Care Costs of Musculoskeletal Disorders Attributable to High Body Mass Index Borne by Sector and Location in 2019

**eTable 13.** Health Care, Morbidity-related, and Total Costs of Musculoskeletal Disorders Attributable to High Body Mass Index by World Bank Income Group in 2019

**eReferences.**

This supplemental material has been provided by the authors to give readers additional information about their work.

## eMethods

### Data sources

We obtained data on the prevalent estimates, years lived with disability (YLDs), and population attributable fractions (PAFs) from the Global Burden of Diseases, Injuries, and Risk Factors Study (GBD) 2019 database.<sup>1</sup> These variables were computed with 95% uncertainty intervals (ie, the 25 th and 975 th values of the 1000 ordered draws in the posterior distribution).<sup>2,3</sup>

We also extracted the shares of health-care costs borne by the public, private, and out-of-pocket sectors from the World Health Organization (WHO) Global Health Expenditure Database.<sup>4</sup> Given that several countries did not have this estimate in 2019, we used its shares in the latest year, ie, Albania (2018), Libya (2011), Yemen (2015), and Syria (2012). Gross domestic product (GDP) data in 2019 were collected from the WHO Global Health Expenditure Database.<sup>4</sup> However, we also collected data from the World Bank,<sup>5</sup> if they were missing in the WHO Global Health Expenditure Database,<sup>4</sup> such as the GDP of Syria, Albania, and Libya in 2019. Additionally, Yemen's GDP data in 2019 was missing, which was replaced with its GDP in 2018 in the World Bank database.<sup>5</sup>

Further, we extracted the number of laborers in country  $i$  ( $L_i$ ) from the World Bank database.<sup>5</sup> Due to the lack of this data in several countries and territories (ie, the Marshall Islands, San Marino, Kiribati, Cook Islands, and Seychelles), we obtained this estimate of these five countries and territories from the International Labour Organization (ILO) data repository.<sup>6</sup>

Given that the number of laborers in Grenada, Antigua and Barbuda, and Micronesia (Federated States of) was not available either in the World Bank or the ILO data repositories, we arrived at this estimate by using the number of people aged 15 and older<sup>7</sup> multiplied by the labor force participation rate in people aged 15 and older.<sup>8</sup> As the number of people aged 15 and older<sup>8</sup> was not estimated for Dominica, Saint Kitts and Nevis, Andorra, Monaco, Palau, Nauru, and Tuvalu, we replaced those with the national populations provided in the World Bank database.<sup>5</sup> Because Niue's population could only be found on its national website<sup>9</sup> and updated in 2017 (**eTable 1**), we used this estimate for Niue in this study. Additional information on data preparation is provided in **eTable 1**.

To estimate the lost output due to morbidity, we obtained the labor income share in GDP in country  $i$  ( $\alpha_i$ )<sup>10</sup> and the ratio of the number of laborers to the population size of age  $j$ , ie, ( $L_{ij}/N_{ij}$ )<sup>8</sup> from the ILO websites. The ILO only provided the labor income share in GDP in country  $i$  ( $\alpha_i$ ) between 2004 and 2017, which was relatively stable. For this reason, we computed the mean value of the  $\alpha_i$  during this period as the  $\alpha_i$  in 2019 for each country and territory. The  $L_{ij}/N_{ij}$  for each age group was missing in 83 countries

and territories (**eTable 2**). Instead, the aggregate results of  $L_{ij}/N_{ij}$  in workers aged 15 and older, 15 to 24, and 25 and older were available. As such, the missing  $L_{ij}/N_{ij}$  for each age group in these 83 countries and territories was replaced with those of their neighboring countries based on the income level and the aggregate  $L_{ij}/N_{ij}$ , particularly in those aged 15 and older, and 25 and older (**eTable 2**). A summary of included variables in this study is provided in **eTable 3**.

### **Additional information on the disease burden estimation**

In the GBD project, sequelae refer to the disabling health outcomes of a disease or injury, and the disability weights measure the severity levels of disability, ranging from 0 (ie, full health) to 1 (ie, death).<sup>3</sup> For example, low back pain (LBP) has 8 sequelae, including mild, moderate, severe, and most severe LBP with or without leg pain, and the disability weights range from 0.02 to 0.38.<sup>3</sup> YLDs by sequela were estimated as the prevalence of a sequela multiplied by the disability weight for that sequela.<sup>3</sup> Details on the YLD estimation are presented in a previous study.<sup>3</sup>

In the GBD data repository,<sup>1</sup> high BMI-attributable YLDs of LBP and gout were only estimated in individuals aged 20 years and older, and high BMI-attributable YLDs of osteoarthritis were only estimated in individuals aged 30 years and older. For this reason, we extracted the available data on high BMI-attributable YLDs of musculoskeletal disorders (MDs) by category from the GBD data repository.<sup>1</sup> Subsequently, we multiplied YLD counts of LBP in individuals aged 15 to 19 years by the high BMI PAF for the age-standardized YLD rate of LBP to arrive at high BMI-attributable YLDs of LBP in individuals aged 15 to 19 years. Similarly, we used this method to calculate high BMI-attributable YLDs of gout in individuals aged 15 to 19 years, and high BMI-attributable YLDs of osteoarthritis in individuals aged 15 to 29 years.

### **Systematic review**

We conducted a systematic review of the English-language literature reporting the national health-care costs of MDs published in the latest ten years (ie, between January 1, 2012 and February 10, 2022). We searched PubMed using the following terms: "((cost[Title] OR spending[Title] OR expenditure[Title] OR econom\*[Title]) AND (musculoskeletal[Title/Abstract] OR back pain[Title/Abstract] OR gout[Title/Abstract] OR osteoarthritis[Title/Abstract] OR neck pain[Title/Abstract] OR rheumatoid arthritis[Title/Abstract]))". The study selection process is summarized in **eFigure 1**, as suggested by the PRISMA statement.<sup>11</sup>

Totally, there were 1332 studies. We included not only those studies reporting health-care costs of at least one category of MDs or making comparisons of health-care costs between cases and controls, but also those studies conducting cost-effectiveness analysis which might also estimate the original health-care costs. In addition, 12 studies were identified from selected reviews. Therefore, 1344 studies were

identified, and 1338 studies were screened after removing 6 duplicates. We first screened the studies based on titles and abstracts. Subsequently, we screened full texts if we were not sure whether the studies were relevant. Because the national economic analyses of MDs were limited, "national estimates" were defined broadly. Some studies estimated the economic costs of MDs but used a large-scale representative sample (sample size >2000) selected from a national database were also included to conduct comparisons and ranking. We did not include pure reviews without providing specific health-care costs, studies with samples that were not selected from a national database or not large enough, and studies conducting the cost-effectiveness analysis among several interventions without estimating disease-specific health-care costs. In addition, we also excluded studies focusing on complication costs, as we did not estimate the costs of complications in our study. Furthermore, studies estimating only one component of health-care costs or using a subpopulation (ie, only females or severe cases) were also excluded. We also did not include two records that conducted cost projections or provided simulation results only. Finally, 14 studies (**eTable 4**) were assessed and ranked based on several criteria listed below.

### **Selection criteria in descending order of importance**

1. Statistical methods: Most studies conducted descriptive analysis. Because a patient might have multiple diseases, we prioritized the study results adjusted for comorbidities, and dealt with data nonrepresentativeness.
2. Precision of study results: Studies using self-reported data were more vulnerable to social desirability, recall, and response bias than observed data. In addition, misclassification of health conditions might occur in self-reported data.
3. Sample size: Studies with larger sample sizes were preferable. We prioritized those studies using a national sample, although the specific sample size might not be provided.
4. Data source: The samples should be selected from a national database or a national sample.
5. Inclusiveness of diseases: We aimed to arrive at the health-care costs per case for LBP, gout, and osteoarthritis. Priority was given to studies including these three categories of MDs.
6. Year of publication: Old data might provide outdated information. We prioritized those studies using the latest data. However, we did not give priority to this benchmark because the bias from statistical flaws outweighed old estimates.
7. Study duration: Studies used data covering a period, representing an average level. However, this criterion was only considered in case we could not arrive at a conclusion based on the six criteria listed above.

Taken together, in terms of the study's representativeness, we ranked the US study first.

### **Additional information on the estimation of health-care costs per case in the US**

In the previous US study, health-care costs were only estimated from 1996 to 2016.<sup>12</sup>

Therefore, we projected the health-care costs of the US from 2016 to 2019 based on the annual growth rate between 1996 and 2016.<sup>12</sup> In the US study,<sup>12</sup> only health-care spending on gout, osteoarthritis, and an aggregate health-care spending on both LBP and neck pain was available (ie, health-care spending on LBP was not estimated separately). For this reason, we assumed that health-care spending per case on LBP and neck pain was equal. We then extracted the prevalent cases of LBP, neck pain, gout, and osteoarthritis in the US from the GBD 2019 database.<sup>1</sup> Subsequently, we calculated the health-care spending per case on MDs by category in the US (**eTable 5**).

### **Methodological validity**

In this study, we estimated the health-care costs per case for each country using an extrapolation method, which was based on the assumption that variations in the overall health spending per head contributed entirely to variations in the cross-country disease-specific costs per case. Despite the potential limitation of reducing generalizability, the extrapolation approach has been well applied in the global economic analyses of non-communicable diseases.<sup>13-15</sup>

Currently, no databases estimate national disease-specific costs per case. For this reason, we compared our estimates with those reported in previous studies<sup>16-21</sup> included in the systematic review shown below. Two national studies<sup>16,18</sup> did not provide prevalence estimates and per case costs. Therefore, we estimated per case costs by using the health-care costs estimated in these two studies divided by the location-year prevalence estimates extracted from the GBD result tool.<sup>1</sup> Currency exchange rates are US\$0.9879 per €1 and US\$0.0068 per JPY1, as of November 5, 2022. Health-care costs per case estimated with the extrapolation method in our study were generally comparable to previous estimates,<sup>16-21</sup> as the points in **eFigure 2** were close to the line  $y = x$ , with only an exception. The per case costs for LBP calculated by Dieleman et al<sup>16</sup> was US\$1424.4 in the US in 2013, lower than that in our study (ie, US\$2222.4) in 2019. A possible explanation was that per case costs for LBP in the US might increase during 2013-2016,<sup>12</sup> which was not taken into account when conducting comparisons.

### **Estimation of lost output due to morbidity**

In this study, we calculated productivity loss per worker in country  $i$  by using the labor income share in GDP in country  $i$  ( $\alpha_i$ ) multiplied by GDP ( $Y_i$ ), divided by the number of laborers ( $L_i$ ). Like a previous report,<sup>22</sup> the output per worker in country  $i$  was assumed to be equal. Taking the unemployment rate in each age group into consideration, we estimated the lost output per worker of age  $j$  ( $W_{ij2019}$ ) by using the  $(\alpha_i Y_i / L_i)$  multiplied by the employment rate of age  $j$  (ie, the ratio of the size of the labor force,  $L_{ij}$ , to the population size of age  $j$ ,  $N_{ij}$ ),

$$W_{ij2019} = (\alpha_i Y_i / L_i) * (L_{ij} / N_{ij}) \quad (1).$$

In equation (1), we assumed the  $\alpha_i$  and  $L_{ij} / N_{ij}$  were constant over time.

Equation (1) was modified to include non-market production. According to previous estimates, household production was equivalent to 23%<sup>23</sup> of the US's GDP and 35%<sup>22</sup> of Ghana's GDP. Due to a lack of country-specific data on the proportion that household production accounts for national GDP, we assumed that non-market output equivalently contributed to 23% of GDP in high-income and upper-middle-income countries, and 35% of GDP in lower-middle-income and low-income countries. The equation (2) below was used to estimate the lost economic output per head due to morbidity in 2019 ( $W'_{ij2019}$ ).

$$W'_{ij2019} = (\alpha_i Y_i / L_i) * (L_{ij} / N_{ij}) + \lambda_i (\alpha_i Y_i / L_i) * [1 - (L_{ij} / N_{ij})] \quad (2),$$

in which the  $\lambda_i$  refers to the percentage of non-market production equally accounting for GDP in country  $i$ . In this study, the  $L_{ij}/N_{ij}$  and  $\lambda_j$  were assumed to be 0 in children and older people, ie,  $L_{ij}/N_{ij} = 0$ ,  $\lambda_j = 0$  ( $j < 15$  or  $j > 84$ ). Given that only the aggregate  $L_{ij}/N_{ij}$  in people aged 65 and older was available, we calculated the  $L_{ij}/N_{ij}$  for people aged 65 to 69, 70 to 74, 75 to 79, 80 to 84, and 85 and older based on the assumption that the  $L_{ij}/N_{ij}$  decreases linearly between age 65 and 85, and reached 0 at age 85 and older.<sup>22</sup>

We then multiplied the lost output per person in 2019 ( $W'_{ij2019}$ ) by YLD counts of MDs attributable to high BMI to arrive at the lost economic output due to morbidity for a person of age  $j$  in country  $i$ ,  $M_{ij}$ , which is calculated as

$$M_{ij} = W'_{ij2019} * YLD_{ij} \quad (3).$$

Finally, we summed  $M_{ij}$  across all ages and diseases as the lost output due to morbidity. The estimations in this study are also summarized in **eTable 3**.

### An example of estimations

To enhance the understanding of our estimation, we took the calculation of disease burden, health-care costs, and lost output due to morbidity of LBP in the UK for example shown below. The cited information indicates where the data were extracted.

#### 1. Attributable cases and YLDs

- 1) Attributable cases = Cases of LBP \* PAF<sup>1</sup>
- 2) Attributable YLDs (for people aged 15-19) = YLDs of LBP \* PAF<sup>1</sup>
- 3) Attributable YLDs (for people aged 20-84): extracted from the GBD result tool<sup>1</sup>

#### 2. Health-care costs

- 1) Cost per case in the US = US spending on LBP<sup>12</sup>/Cases of LBP in the US<sup>1</sup>  
The spending ratio = Overall health spending per head in the UK<sup>24</sup>/ Overall health spending per head in the US<sup>24</sup>
- 2) Cost per case in the UK = Cost per case in the US \* the spending ratio
- 3) Attributable health-care costs = Attributable cases \* cost per case in the UK

### 3. Lost output due to morbidity

1) The expected market production per worker of age  $j$ , ie,  $W_{j2019} = (\alpha Y/L) * (L_j/N_j)$ ,

$\alpha$ : the labor income share in GDP<sup>10</sup>

$Y$ : GDP<sup>4</sup>

$L$ : the number of laborers<sup>5</sup>

$L_j/N_j$ : the labor force participation rate of age  $j$ , ie, the ratio of the number of laborers ( $L_j$ ) to the population size of age  $j$  ( $N_j$ )<sup>8</sup>

2) The market and non-market production per person, ie,

$$W'_{ij2019} = (\alpha Y/L) * (L_j/N_j) + \lambda (\alpha Y/L) * [1 - (L_j/N_j)]$$

$\lambda$ : The ratio of non-market production equally accounting for the UK's GDP

As the UK is a high-income country, we assumed  $\lambda$  to be 23%.

3) Productivity losses due to morbidity =  $W'_{ij2019} * \text{Attributable YLDs}$

The method to estimate the lost output due to morbidity has been applied in previous studies.<sup>22,25</sup>



**eTable 1.** Sources or calculation methods for the labor force

| Countries or territories                                                   | Sources or calculation methods for the labor force                                                                                                                                                      |
|----------------------------------------------------------------------------|---------------------------------------------------------------------------------------------------------------------------------------------------------------------------------------------------------|
| Marshall Islands, San Marino, Kiribati, Cook Islands, and Seychelles       | The International Labour Organization data repository <sup>6</sup>                                                                                                                                      |
| The Grenada, Antigua and Barbuda, and Micronesia (Federated States of)     | The number of people aged 15 and older <sup>7</sup> multiplied by the labor force participation rate in people aged 15 and older <sup>8</sup>                                                           |
| Dominica, Saint Kitts and Nevis, Andorra, Monaco, Palau, Nauru, and Tuvalu | The national populations in these countries and territories provided in the World Bank database <sup>5</sup> to multiply by the labor force participation rate in people aged 15 and older <sup>8</sup> |
| Niue                                                                       | The national population extracted from the statistic official website of Niue <sup>9</sup> was used to multiply by the labor force participation rate in people aged 15 and older. <sup>8</sup>         |
| Others                                                                     | The World Bank database <sup>5</sup>                                                                                                                                                                    |

**eTable 2.** Locations with missing values, substitutes, and income levels

| Locations with missing values    | Income level of locations with missing values | Location substitutes | Income level of location substitutes |
|----------------------------------|-----------------------------------------------|----------------------|--------------------------------------|
| Afghanistan                      | Low                                           | Guinea               | Low                                  |
| Algeria                          | Lower-middle                                  | Guinea               | Low                                  |
| Andorra                          | High                                          | Spain                | High                                 |
| Angola                           | Lower-middle                                  | Kenya                | Lower-middle                         |
| Antigua and Barbuda              | High                                          | Mexico               | Upper-middle                         |
| Bahamas                          | High                                          | Dominican Republic   | Upper-middle                         |
| Bahrain                          | High                                          | Qatar                | High                                 |
| Bangladesh                       | Lower-middle                                  | Myanmar              | Lower-middle                         |
| Benin                            | Lower-middle                                  | Kenya                | Lower-middle                         |
| Bhutan                           | Lower-middle                                  | Myanmar              | Lower-middle                         |
| Burkina Faso                     | Low                                           | Guinea               | Low                                  |
| Burundi                          | Low                                           | Rwanda               | Low                                  |
| Cabo Verde                       | Lower-middle                                  | Senegal              | Lower-middle                         |
| Cameroon                         | Lower-middle                                  | Kenya                | Lower-middle                         |
| Central African Republic         | Low                                           | Kenya                | Lower-middle                         |
| Chad                             | Low                                           | Guinea               | Low                                  |
| China                            | Upper-middle                                  | Indonesia            | Upper-middle                         |
| Comoros                          | Lower-middle                                  | Rwanda               | Low                                  |
| Congo                            | Lower-middle                                  | Rwanda               | Low                                  |
| Cuba                             | Upper-middle                                  | Dominican Republic   | Upper-middle                         |
| Democratic Republic of the Congo | Low                                           | Rwanda               | Low                                  |
| Djibouti                         | Lower-middle                                  | Somalia              | Low                                  |
| Dominica                         | Upper-middle                                  | Saint Lucia          | Upper-middle                         |
| Equatorial Guinea                | Upper-middle                                  | South Africa         | Upper-middle                         |
| Eritrea                          | Low                                           | Somalia              | Low                                  |
| Eswatini                         | Lower-middle                                  | South Africa         | Upper-middle                         |
| Ethiopia                         | Low                                           | Somalia              | Low                                  |
| Fiji                             | Upper-middle                                  | Cook Islands         | High                                 |
| Gabon                            | Upper-middle                                  | South Africa         | Upper-middle                         |
| Gambia                           | Low                                           | Guinea               | Low                                  |
| Ghana                            | Lower-middle                                  | Guinea               | Low                                  |
| Grenada                          | Upper-middle                                  | Saint Lucia          | Upper-middle                         |
| Guinea-Bissau                    | Low                                           | Guinea               | Low                                  |
| Haiti                            | Low                                           | Guinea               | Low                                  |
| Iraq                             | Upper-middle                                  | Jordan               | Upper-middle                         |

|                                  |              |                  |              |
|----------------------------------|--------------|------------------|--------------|
| Ivory Coast                      | Lower-middle | Guinea           | Low          |
| Kazakhstan                       | Upper-middle | Kyrgyzstan       | Lower-middle |
| Kuwait                           | High         | Qatar            | High         |
| Lao People's Democratic Republic | Lower-middle | Thailand         | Upper-middle |
| Liberia                          | Low          | Guinea           | Low          |
| Libya                            | Upper-middle | Guinea           | Low          |
| Madagascar                       | Low          | Zimbabwe         | Lower-middle |
| Malawi                           | Low          | Zimbabwe         | Lower-middle |
| Mali                             | Low          | Guinea           | Low          |
| Mauritania                       | Lower-middle | Guinea           | Low          |
| Micronesia (Federated States of) | Lower-middle | Philippines      | Lower-middle |
| Monaco                           | High         | France           | High         |
| Morocco                          | Lower-middle | Guinea           | Low          |
| Mozambique                       | Low          | Zimbabwe         | Lower-middle |
| Namibia                          | Upper-middle | Botswana         | Upper-middle |
| Nauru                            | High         | Marshall Islands | Upper-middle |
| Nepal                            | Lower-middle | Myanmar          | Lower-middle |
| Nicaragua                        | Lower-middle | Honduras         | Lower-middle |
| Niger                            | Low          | Guinea           | Low          |
| Niue                             | High         | Cook Islands     | High         |
| Oman                             | High         | Qatar            | High         |
| Palau                            | High         | Japan            | High         |
| Papua New Guinea                 | Lower-middle | Indonesia        | Upper-middle |
| Saint Kitts and Nevis            | High         | Mexico           | Upper-middle |
| Saint Vincent and the Grenadines | Upper-middle | Saint Lucia      | Upper-middle |
| San Marino                       | High         | Italy            | High         |
| Sao Tome and Principe            | Lower-middle | South Africa     | Upper-middle |
| Saudi Arabia                     | High         | Qatar            | High         |
| Sierra Leone                     | Low          | Guinea           | Low          |
| Solomon Islands                  | Lower-middle | Indonesia        | Upper-middle |
| South Sudan                      | Low          | Kenya            | Lower-middle |
| Sudan                            | Low          | Somalia          | Low          |
| Suriname                         | Upper-middle | Guyana           | Upper-middle |
| Syrian Arab Republic             | Low          | Guinea           | Low          |
| Tajikistan                       | Low          | Kyrgyzstan       | Lower-middle |
| Timor-Leste                      | Lower-middle | Indonesia        | Upper-middle |
| Togo                             | Low          | Guinea           | Low          |
| Tonga                            | Upper-middle | Cook Islands     | High         |

|                                    |              |            |              |
|------------------------------------|--------------|------------|--------------|
| Trinidad and Tobago                | High         | Colombia   | Upper-middle |
| Tunisia                            | Lower-middle | Guinea     | Low          |
| Turkmenistan                       | Upper-middle | Kyrgyzstan | Lower-middle |
| Tuvalu                             | Upper-middle | Guinea     | Low          |
| Uganda                             | Low          | Kenya      | Lower-middle |
| Ukraine                            | Lower-middle | Belarus    | Upper-middle |
| United Republic of Tanzania        | Lower-middle | Rwanda     | Low          |
| Uzbekistan                         | Lower-middle | Kyrgyzstan | Lower-middle |
| Venezuela (Bolivarian Republic of) | Upper-middle | Colombia   | Upper-middle |

**eTable 3.** A summary of included variables in this study

|                   | Generated variables                                  | Input variables                                                                                          | Input variables accompanied by 95% uncertainty intervals | Input data sources                             | Calculation methods or extraction                                                                                   |
|-------------------|------------------------------------------------------|----------------------------------------------------------------------------------------------------------|----------------------------------------------------------|------------------------------------------------|---------------------------------------------------------------------------------------------------------------------|
| Disease burden    | a. Attributable cases                                | a1. Cases of MDs by category<br>a2. PAFs                                                                 | a1 and a2                                                | GBD result tool <sup>1</sup>                   | $a = a1 * a2$                                                                                                       |
|                   | b. Attributable YLDs                                 | b1. YLDs of LBP and gout (for people aged 15-19), and osteoarthritis (for people aged 15-29)<br>b2. PAFs | b1 and b2                                                | GBD result tool <sup>1</sup>                   | $b = b1 * b2$                                                                                                       |
|                   | -                                                    | b3. YLDs of LBP and gout (for people aged 20-84) and osteoarthritis (for people aged 30-84)              | b3                                                       | GBD result tool <sup>1</sup>                   | Extracted from the GBD result tool <sup>1</sup>                                                                     |
| Health-care costs | c. Costs per case by category in the US              | c1. Costs of MDs by category in the US                                                                   | -                                                        | The US study <sup>12</sup>                     | $c = c1 / c2$                                                                                                       |
|                   |                                                      | c2. Cases of MDs by category in the US                                                                   | -                                                        | GBD result tool <sup>1</sup>                   |                                                                                                                     |
|                   | d. Costs per case of MDs by category in each country | Overall health spending per capita in each country                                                       | -                                                        | The global health spending study <sup>24</sup> | The spending ratio = Overall health spending per capita in a country / Overall health spending per capita in the US |

|                     |                                                               |                                                                 |              |                                                                                          |                                                                                                              |
|---------------------|---------------------------------------------------------------|-----------------------------------------------------------------|--------------|------------------------------------------------------------------------------------------|--------------------------------------------------------------------------------------------------------------|
|                     |                                                               |                                                                 |              |                                                                                          | $d = c \cdot \text{the spending ratio}$                                                                      |
|                     | e. Attributable health-care costs by category in each country | d and a                                                         | Listed above | Listed above                                                                             | $e = d \cdot a$                                                                                              |
|                     | f. Attributable health-care costs by sector                   | Expenditure shares                                              | -            | The WHO Global Health Expenditure Database <sup>4</sup>                                  | f = The sum of attributable health-care costs (ie, e) across diseases*expenditure shares                     |
| Productivity losses | g. The lost market output per worker                          | g1. The labor income share in GDP in country $i$ ( $\alpha_i$ ) | -            | ILO database <sup>10</sup>                                                               | Extracted from the ILO database <sup>10</sup>                                                                |
|                     |                                                               | g2. GDP ( $Y_i$ )                                               | -            | The WHO Global Health Expenditure Database, <sup>4</sup> and the World Bank <sup>5</sup> | Extracted from the WHO Global Health Expenditure Database, <sup>4</sup> and the World Bank <sup>5</sup>      |
|                     |                                                               | g3. The number of laborers ( $L_i$ )                            | -            | The World Bank database, <sup>5</sup> and the ILO data repository <sup>6</sup>           | The $L_i$ in several countries and territories was calculated based on the labor force participation rate in |

|  |                                          |                                                                                               |   |                                                                                            |                                                                                                                                                                                                                                                                                                                                    |
|--|------------------------------------------|-----------------------------------------------------------------------------------------------|---|--------------------------------------------------------------------------------------------|------------------------------------------------------------------------------------------------------------------------------------------------------------------------------------------------------------------------------------------------------------------------------------------------------------------------------------|
|  |                                          |                                                                                               |   |                                                                                            | people aged 15 and older (eTable 1). <sup>8</sup>                                                                                                                                                                                                                                                                                  |
|  |                                          | g4. The ratio of the number of laborers to the population size of age $j$ ( $L_{ij}/N_{ij}$ ) | - | ILO websites <sup>8</sup>                                                                  | We estimated the lost output per worker of age $j$ ( $W_{ij2019}$ ) as follows-<br>$W_{ij2019} = (\alpha_i Y_i / L_i) * (L_{ij} / N_{ij})$ .                                                                                                                                                                                       |
|  | h. The lost non-market output per person | The ratio of non-market production equally accounting for GDP in country $i$ ( $\lambda_i$ )  | - | The official website of the US government <sup>23</sup> and a previous study <sup>22</sup> | $\lambda_i$ was assumed to be 23% in high-income and upper-middle-income countries, and 35% in lower-middle-income and low-income countries.<br><br>The lost market and non-market output per person, ie,<br>$W'_{ij2019} = (\alpha_i Y_i / L_i) * (L_{ij} / N_{ij}) + \lambda_i (\alpha_i Y_i / L_i) * [1 - (L_{ij} / N_{ij})]$ . |

Abbreviations: GBD, Global Burden of Diseases, Injuries, and Risk Factors Study; GDP, gross domestic product; ILO, International Labour Organization; LBP, low back pain; MDs, musculoskeletal disorders; PAFs, population attributable fractions; WHO, World Health Organization; YLDs, years lived with disability.

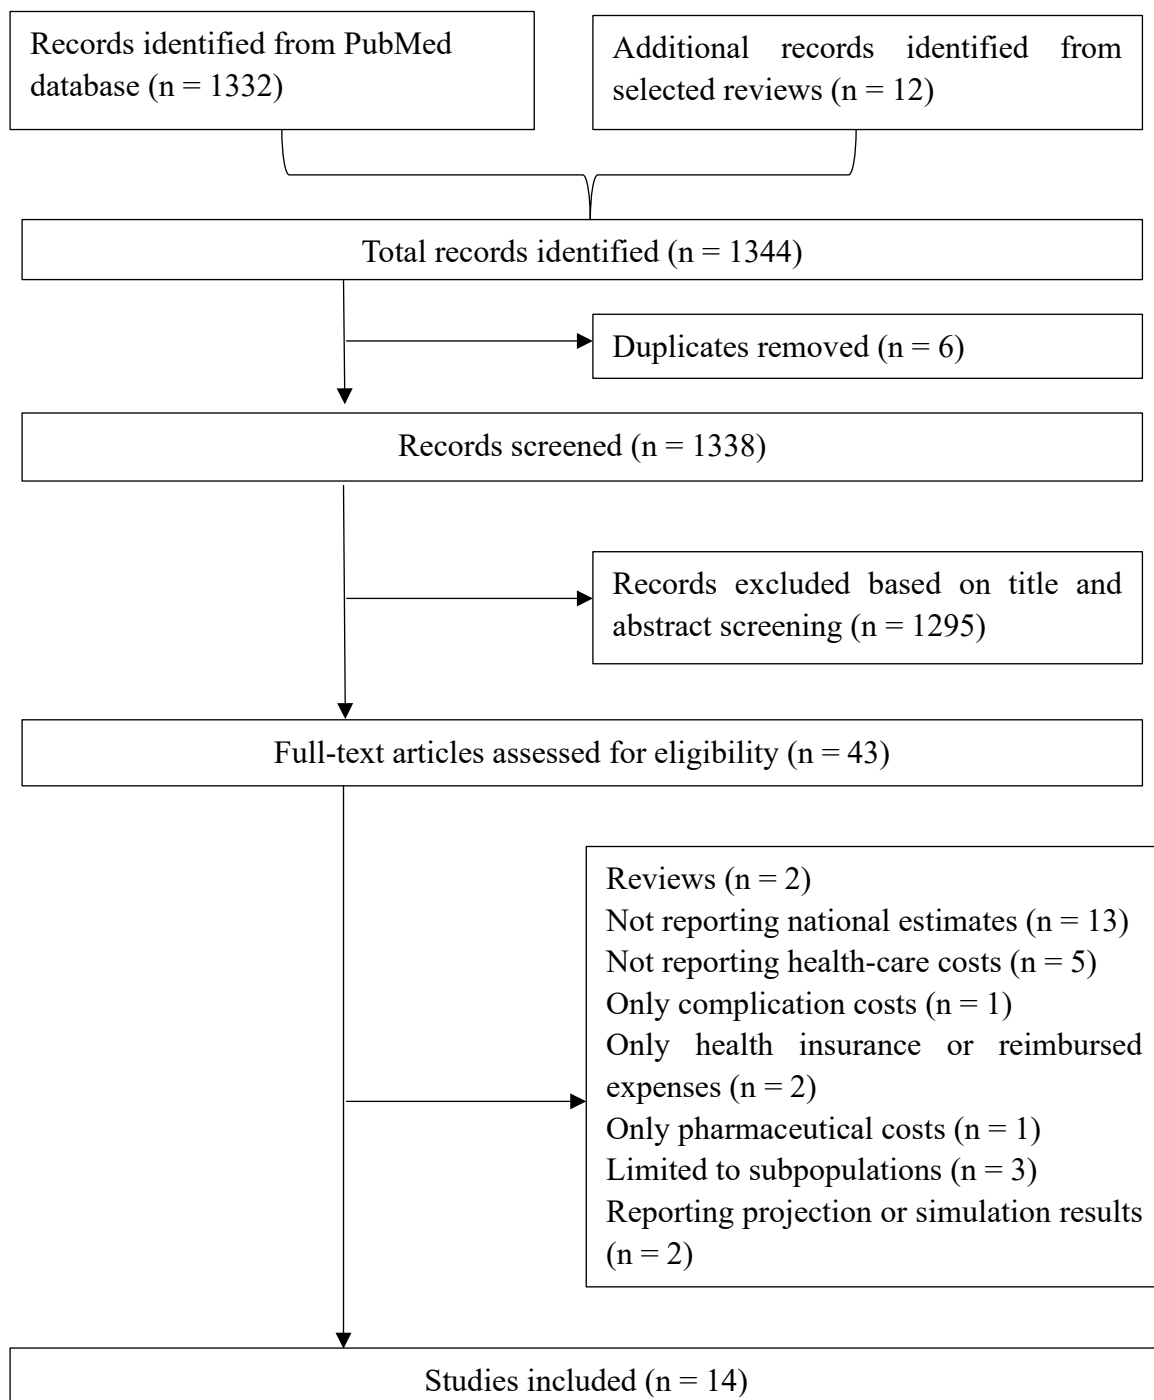

**eFigure 1.** Study selection



| eTable 4. Study ranking |                              |                     |         |                                                                                                     |                                                      |                                                                                                                                       |                                                                                                                                                                                  |                                                                                 |                |
|-------------------------|------------------------------|---------------------|---------|-----------------------------------------------------------------------------------------------------|------------------------------------------------------|---------------------------------------------------------------------------------------------------------------------------------------|----------------------------------------------------------------------------------------------------------------------------------------------------------------------------------|---------------------------------------------------------------------------------|----------------|
| Rank                    | Reference                    | Year of publication | Country | Data sources                                                                                        | Sample size                                          | Statistical methods                                                                                                                   | Precision of study results                                                                                                                                                       | Inclusiveness of diseases                                                       | Study duration |
| 1                       | Dieleman et al <sup>12</sup> | 2020                | The US  | Government budgets, insurance claims, facility records, household surveys, and official US records. | A national sample. The sample size was not provided. | Spending estimates were adjusted for comorbidities. Data nonrepresentativeness was addressed and specific adjustments were discussed. | Samples were identified based on the diagnosis code.<br><br>The degree to which the parameters were constrained was determined.<br><br>The confidence intervals were calculated. | Low back, neck pain, osteoarthritis, gout, rheumatoid arthritis, and other MDs. | 1996-2016      |
| 2                       | Dieleman et al <sup>16</sup> | 2016                | The US  | Government budgets, insurance claims, facility surveys, household                                   | A national sample. The sample size was not provided. | Spending was adjusted to reflect the health condition treated.                                                                        | In some cases, a small number of cases were used as a basis for estimation.                                                                                                      | Low back, neck pain, osteoarthritis, gout, rheumatoid                           | 1996-2013      |

|   |                                  |      |       |                                                         |                                                 |                                                          |                                                                                                                                                                                                                                                                        |                              |           |
|---|----------------------------------|------|-------|---------------------------------------------------------|-------------------------------------------------|----------------------------------------------------------|------------------------------------------------------------------------------------------------------------------------------------------------------------------------------------------------------------------------------------------------------------------------|------------------------------|-----------|
|   |                                  |      |       | surveys, and official US records.                       |                                                 |                                                          | The uncertainty intervals were calculated.                                                                                                                                                                                                                             | arthritis, and other MDs.    |           |
| 3 | Ebata-Kogure et al <sup>17</sup> | 2020 | Japan | The sample was selected from a medical claims database. | 1,006,385                                       | A descriptive analysis.                                  | Not very precise because the costs were included regardless of whether they were incurred for hip or knee osteoarthritis or other concurrent diseases.<br><br>Uncertainty levels were not estimated, but the interquartile ranges of health-care costs were estimated. | Hip and knee osteoarthritis. | 2013-2019 |
| 4 | Lee et al <sup>18</sup>          | 2019 | Korea | National Health Insurance claims data.                  | Nationally representative sample.<br>The sample | The economic burden was estimated with a human resources | Not very precise because patients were defined based on their use                                                                                                                                                                                                      | LBP and osteoarthritis.      | 2015      |

|   |                              |      |        |                                                                                         |                                                   |                                              |                                                                                                                                                    |                                                         |           |
|---|------------------------------|------|--------|-----------------------------------------------------------------------------------------|---------------------------------------------------|----------------------------------------------|----------------------------------------------------------------------------------------------------------------------------------------------------|---------------------------------------------------------|-----------|
|   |                              |      |        |                                                                                         | size was not provided.                            | approach.                                    | of health-care services, but there is a possibility that the number of patients was under- or overestimated.                                       |                                                         |           |
| 5 | Ahn et al <sup>26</sup>      | 2016 | Korea  | The sample was selected from the Korean National Health Insurance claims database.      | The sample size for patients with LBP was 111544. | A descriptive analysis.                      | Definitions of LBP and lumbar disorders relying solely on claims of disease diagnosis have limited accuracy.                                       | LBP, intervertebral disc disorder, and spinal stenosis. | 2011      |
| 6 | Olafsson et al <sup>19</sup> | 2018 | Sweden | The sample was selected from national registers and an administrative patient database. | 129,973                                           | Using a prevalence-based bottom-up approach. | Descriptive statistics accompanied by 95% CI<br>Limit to a region of Sweden<br>Some costs were not included (eg, out-of-pocket costs for over-the- | LBP                                                     | 2008-2011 |

|    |                                                 |      |        |                                                                                        |            |                                                                                            |                                                                                                                   |                          |           |
|----|-------------------------------------------------|------|--------|----------------------------------------------------------------------------------------|------------|--------------------------------------------------------------------------------------------|-------------------------------------------------------------------------------------------------------------------|--------------------------|-----------|
|    |                                                 |      |        |                                                                                        |            |                                                                                            | counter drugs).                                                                                                   |                          |           |
| 7  | Alonso-García and Sarría-Santamer <sup>20</sup> | 2020 | Spain  | A nationally representative sample.                                                    | 23,089     | A descriptive analysis.                                                                    | Not very precise because the information on LBP was self-reported.<br><br>Costs with missing values were imputed. | LBP                      | 2017      |
| 8  | Zhao et al <sup>21</sup>                        | 2019 | The US | Weighted nationally representative data from the 2015 Medical Expenditure Panel Survey | 25,562,623 | Rao-Scott chi-square tests for categorical variables and t-tests for continuous variables. | Using self-reported data                                                                                          | Osteoarthritis           | 2015      |
| 9  | Flores et al <sup>27</sup>                      | 2019 | The US | National Health and Wellness Survey                                                    | 2559       | A descriptive analysis based on self-reported gout diagnosis and symptoms.                 | Using self-reported data                                                                                          | Gout                     | 2012-2013 |
| 10 | Williams et al <sup>28</sup>                    | 2017 | The US | The Medical Expenditures Panel Survey                                                  | 35,313     | A descriptive analysis.                                                                    | Spending adjusted for functional limitations.                                                                     | Arthritis and joint pain | 2011      |

|    |                              |      |        |                                                                                          |                                    |                         |                                                                                                                                                                                                                           |                      |           |
|----|------------------------------|------|--------|------------------------------------------------------------------------------------------|------------------------------------|-------------------------|---------------------------------------------------------------------------------------------------------------------------------------------------------------------------------------------------------------------------|----------------------|-----------|
|    |                              |      |        |                                                                                          |                                    |                         | Based on self-report data.                                                                                                                                                                                                |                      |           |
| 11 | Eriksson et al <sup>29</sup> | 2015 | Sweden | Collected from national registries.<br><br>Costs data were derived from several sources. | 49,829                             | A descriptive analysis. | The costs were underestimated due to the unavailable information on some cost components.<br><br>The uncertainty levels were calculated.                                                                                  | Rheumatoid arthritis | 2010      |
| 12 | Kalkan et al <sup>30</sup>   | 2014 | Sweden | Collected from national and regional registries.                                         | Ranged from 2539 to 8058 annually. | A descriptive analysis. | Missing data were estimated based on assumptions.<br><br>Data for outpatient care and sick leave were not complete for all years in the 1990s, and average values were used, leading to possible over- or underestimation | Rheumatoid arthritis | 1990-2010 |

|    |                             |      |        |                                                                                     |                                   |                                                                                    |                                                                                                                               |                        |           |
|----|-----------------------------|------|--------|-------------------------------------------------------------------------------------|-----------------------------------|------------------------------------------------------------------------------------|-------------------------------------------------------------------------------------------------------------------------------|------------------------|-----------|
|    |                             |      |        |                                                                                     |                                   |                                                                                    | of minor importance for the total costs.                                                                                      |                        |           |
| 13 | Huscher et al <sup>31</sup> | 2015 | German | Collected from the National Database of the German Collaborative Arthritis Centers. | About 3400 patients annually.     | Costs were calculated using fixed prices as well as annually updated cost factors. | The authors probably underestimated 12-months related components (ie, medication costs) due to memory bias.                   | Rheumatoid arthritis   | 2002-2011 |
| 14 | Kinge et al <sup>32</sup>   | 2017 | Norway | The Norwegian Directorate of Health.                                                | The sample size was not provided. | A descriptive analysis.                                                            | This study did not provide the estimates we need because only an aggregate cost for the musculoskeletal system was available. | Musculoskeletal system | 2013      |

Abbreviations: CI, confidence interval; LBP, low back pain; MDs, musculoskeletal disorders.

**eTable 5.** Health-care costs per case of low back pain, gout, and osteoarthritis in the US

| Health condition | Health-care costs, 2016 US\$ billion <sup>a</sup> | Annualized rate of change, 1996–2016 (%) <sup>a</sup> | Health-care costs, 2019 US\$ billion | Prevalence, 2019 <sup>b</sup> | Health-care costs per case, 2019 US\$ |
|------------------|---------------------------------------------------|-------------------------------------------------------|--------------------------------------|-------------------------------|---------------------------------------|
| Low back pain    | 95.6                                              | 6.6                                                   | 115.8                                | 52,105,428                    | 2222.4                                |
| Gout             | 2.8                                               | 5.8                                                   | 3.3                                  | 8,655,567                     | 381.3                                 |
| Osteoarthritis   | 80.0                                              | 7.7                                                   | 99.9                                 | 51,865,889                    | 1926.1                                |

<sup>a</sup> Based on estimates from Dieleman et al<sup>12</sup>

<sup>b</sup> Based on estimates from the GBD 2019 Diseases and Injuries Collaborators<sup>3</sup>

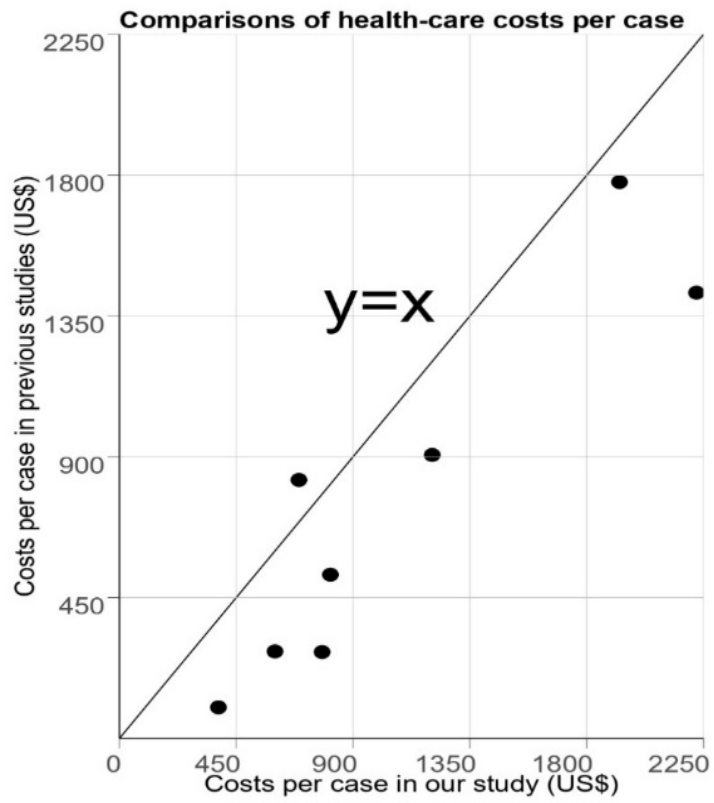

**eFigure 2.** Comparisons of health-care costs per case (US\$)



**eTable 6.** Disease burden of low back pain, gout, and osteoarthritis attributable to high body mass index by location in 2019 (amount, uncertainty level)

| Location                 | Low back pain                            |                                       | Gout                                    |                                    | Osteoarthritis                            |                                      |
|--------------------------|------------------------------------------|---------------------------------------|-----------------------------------------|------------------------------------|-------------------------------------------|--------------------------------------|
|                          | Prevalence                               | YLDs                                  | Prevalence                              | YLDs                               | Prevalence                                | YLDs                                 |
| Global                   | 36267110<br>(18437198<br>to<br>61011482) | 4281563<br>(1857645<br>to<br>8146944) | 16947252<br>(7454900<br>to<br>32457792) | 508008<br>(214287<br>to<br>984921) | 72969260<br>(32371084<br>to<br>131052677) | 2556020<br>(912145<br>to<br>5824027) |
| Africa                   | 2759627<br>(1375035<br>to<br>4752062)    | 305764<br>(125454<br>to<br>604680)    | 758571<br>(329691 to<br>1485300)        | 24079<br>(9475<br>to<br>49197)     | 3964819<br>(1814204<br>to<br>7032158)     | 142132<br>(51434<br>to<br>323229)    |
| Algeria                  | 285676<br>(151890 to<br>457322)          | 33514<br>(15260<br>to<br>61362)       | 82950<br>(40110 to<br>150719)           | 2598<br>(1106<br>to<br>5030)       | 443930<br>(218134 to<br>717656)           | 15483<br>(6152 to<br>34270)          |
| Angola                   | 48771<br>(21260 to<br>90401)             | 5302<br>(1806 to<br>11319)            | 12555<br>(4528 to<br>26958)             | 412<br>(131 to<br>925)             | 63278<br>(24502 to<br>122093)             | 2360<br>(713 to<br>5652)             |
| Benin                    | 36435<br>(18325 to<br>62022)             | 3910<br>(1633 to<br>7687)             | 8758<br>(3934 to<br>16633)              | 288<br>(113 to<br>593)             | 48948<br>(22767 to<br>86221)              | 1810<br>(665 to<br>4132)             |
| Botswana                 | 9249 (5394<br>to 14363)                  | 1017<br>(471 to<br>1868)              | 3367<br>(1600 to<br>6249)               | 104 (41<br>to 210)                 | 17822<br>(9137 to<br>29276)               | 622 (245<br>to 1377)                 |
| Burkina Faso             | 44535<br>(19388 to<br>84036)             | 4762<br>(1671 to<br>10264)            | 9313<br>(3365 to<br>20329)              | 298 (93<br>to 671)                 | 63811<br>(25138 to<br>123214)             | 2302<br>(722 to<br>5468)             |
| Burundi                  | 11058<br>(3935 to<br>23095)              | 1207<br>(339 to<br>2832)              | 2925 (836<br>to 7306)                   | 95 (23<br>to 239)                  | 14323<br>(4883 to<br>30864)               | 519 (130<br>to 1317)                 |
| Cabo Verde               | 2389 (1279<br>to 3953)                   | 276 (122<br>to 522)                   | 770 (360<br>to 1446)                    | 24 (9 to<br>48)                    | 4521 (2198<br>to 7743)                    | 158 (60<br>to 354)                   |
| Cameroon                 | 113130<br>(59622 to<br>187541)           | 12207<br>(5330 to<br>23418)           | 27598<br>(12841 to<br>51004)            | 875<br>(353 to<br>1763)            | 148843<br>(73404 to<br>248944)            | 5315<br>(2062 to<br>11905)           |
| Central African Republic | 5456 (1949<br>to 11553)                  | 596 (166<br>to 1396)                  | 1308 (375<br>to 3272)                   | 43 (10<br>to 107)                  | 6991 (2199<br>to 15258)                   | 258 (65<br>to 649)                   |
| Chad                     | 19903<br>(8112 to<br>38096)              | 2066<br>(669 to<br>4546)              | 4283<br>(1396 to<br>9971)               | 137 (39<br>to 323)                 | 24180<br>(8797 to<br>48457)               | 872 (250<br>to 2105)                 |
| Comoros                  | 1914 (915<br>to 3382)                    | 222 (86<br>to 448)                    | 576 (226<br>to 1197)                    | 18 (6 to<br>40)                    | 2944 (1207<br>to 5590)                    | 105 (34<br>to 246)                   |

|                                  |                             |                          |                           |                       |                             |                         |
|----------------------------------|-----------------------------|--------------------------|---------------------------|-----------------------|-----------------------------|-------------------------|
| Congo                            | 16659<br>(9035 to 27335)    | 1891<br>(813 to 3635)    | 5055<br>(2258 to 9646)    | 167 (64 to 344)       | 24918<br>(11709 to 43018)   | 910 (339 to 2036)       |
| Democratic Republic of the Congo | 119975<br>(49724 to 230839) | 12685<br>(4130 to 28030) | 36104<br>(12918 to 78970) | 1124<br>(342 to 2608) | 162531<br>(63546 to 326723) | 5858<br>(1746 to 14078) |
| Equatorial Guinea                | 5208 (2884 to 8445)         | 568 (251 to 1077)        | 1245 (603 to 2203)        | 40 (16 to 79)         | 5765 (2916 to 9782)         | 204 (79 to 453)         |
| Eritrea                          | 6813 (2901 to 12837)        | 671 (215 to 1492)        | 2184 (782 to 4828)        | 63 (18 to 149)        | 11955<br>(4411 to 23361)    | 398 (108 to 978)        |
| Eswatini                         | 4682 (2551 to 7349)         | 492 (223 to 913)         | 1685 (847 to 2951)        | 50 (22 to 97)         | 8708 (4480 to 13944)        | 300 (122 to 657)        |
| Ethiopia                         | 133552<br>(54173 to 259601) | 15039<br>(5001 to 32889) | 38867<br>(12745 to 88280) | 1274<br>(413 to 2853) | 162527<br>(59512 to 333345) | 5930<br>(1707 to 14436) |
| Gabon                            | 8095 (4269 to 13062)        | 924 (415 to 1736)        | 2441<br>(1130 to 4500)    | 77 (32 to 151)        | 12772<br>(6252 to 21215)    | 460 (179 to 1028)       |
| Gambia                           | 5660 (2791 to 9833)         | 607 (245 to 1221)        | 1519 (644 to 2972)        | 49 (18 to 103)        | 8098 (3641 to 14465)        | 290 (104 to 657)        |
| Ghana                            | 102261<br>(56419 to 164425) | 11364<br>(5087 to 21456) | 31554<br>(14956 to 58008) | 996<br>(399 to 1994)  | 190601<br>(94902 to 322196) | 6813<br>(2613 to 15346) |
| Guinea                           | 23309<br>(10838 to 42330)   | 2500<br>(916 to 5245)    | 5548<br>(2042 to 12047)   | 176 (56 to 395)       | 33685<br>(13743 to 63940)   | 1197<br>(383 to 2800)   |
| Guinea-Bissau                    | 3196 (1380 to 6084)         | 340 (116 to 735)         | 714 (258 to 1563)         | 23 (7 to 52)          | 4285 (1667 to 8306)         | 157 (48 to 373)         |
| Ivory Coast                      | 71045<br>(35071 to 123014)  | 8031<br>(3279 to 15741)  | 18291<br>(7422 to 36733)  | 608<br>(225 to 1284)  | 92763<br>(41276 to 166678)  | 3476<br>(1223 to 7881)  |
| Kenya                            | 131085<br>(67420 to 223807) | 14829<br>(6289 to 28764) | 39482<br>(17606 to 76540) | 1295<br>(558 to 2547) | 170821<br>(78224 to 304356) | 6305<br>(2324 to 14141) |
| Lesotho                          | 7317 (3920 to 11862)        | 794 (351 to 1494)        | 2279<br>(1078 to 4261)    | 69 (28 to 140)        | 13601<br>(6754 to 23181)    | 475 (182 to 1054)       |
| Liberia                          | 15975<br>(8388 to 26430)    | 1789<br>(790 to 3424)    | 4244<br>(1923 to 7988)    | 143 (55 to 290)       | 22275<br>(10649 to 38134)   | 826 (316 to 1846)       |
| Madagascar                       | 35993<br>(15906 to 65940)   | 3921<br>(1333 to 8384)   | 10320<br>(3758 to 22605)  | 337<br>(105 to 793)   | 52061<br>(20113 to 102112)  | 1877<br>(546 to 4520)   |

|                       |                               |                            |                             |                        |                               |                          |
|-----------------------|-------------------------------|----------------------------|-----------------------------|------------------------|-------------------------------|--------------------------|
| Malawi                | 32689<br>(14077 to 60688)     | 3548<br>(1229 to 7490)     | 8629<br>(3209 to 18102)     | 269 (86 to 593)        | 43439<br>(17058 to 84309)     | 1535<br>(468 to 3620)    |
| Mali                  | 34026<br>(15244 to 63136)     | 3590<br>(1284 to 7617)     | 9239<br>(3448 to 19605)     | 297 (97 to 658)        | 53348<br>(21510 to 100459)    | 1921<br>(618 to 4464)    |
| Mauritania            | 15075<br>(8171 to 24772)      | 1656<br>(734 to 3156)      | 4491<br>(2116 to 8326)      | 139 (57 to 278)        | 24468<br>(12318 to 40905)     | 863 (335 to 1929)        |
| Mauritius             | 7722 (4018 to 12908)          | 915 (396 to 1740)          | 4066<br>(1736 to 7773)      | 124 (50 to 251)        | 15527<br>(6929 to 26890)      | 519 (185 to 1159)        |
| Mozambique            | 46292<br>(20638 to 84062)     | 5222<br>(1852 to 10742)    | 10793<br>(3981 to 23335)    | 354<br>(110 to 800)    | 55184<br>(21752 to 107812)    | 2017<br>(612 to 4813)    |
| Namibia               | 7728 (4417 to 12356)          | 836 (374 to 1573)          | 2666<br>(1280 to 4897)      | 81 (32 to 163)         | 13988<br>(7100 to 23863)      | 483 (184 to 1073)        |
| Niger                 | 28472<br>(11978 to 54802)     | 2959<br>(998 to 6518)      | 6152<br>(2110 to 14239)     | 202 (59 to 473)        | 37893<br>(14328 to 75804)     | 1392<br>(416 to 3321)    |
| Nigeria               | 630730<br>(314374 to 1087273) | 69471<br>(28604 to 138456) | 127274<br>(55380 to 249798) | 4126<br>(1735 to 8112) | 715885<br>(314830 to 1308373) | 26209<br>(9468 to 58932) |
| Rwanda                | 23517<br>(9601 to 45011)      | 2577<br>(852 to 5609)      | 5504<br>(1879 to 12372)     | 173 (51 to 399)        | 33406<br>(12445 to 66513)     | 1197<br>(351 to 2921)    |
| Sao Tome and Principe | 657 (336 to 1099)             | 74 (32 to 143)             | 211 (95 to 402)             | 7 (3 to 14)            | 1143 (550 to 1981)            | 41 (16 to 93)            |
| Senegal               | 35206<br>(18004 to 60893)     | 3865<br>(1555 to 7706)     | 10065<br>(4193 to 20271)    | 316<br>(114 to 671)    | 59527<br>(26370 to 105690)    | 2120<br>(732 to 4870)    |
| Seychelles            | 598 (308 to 1009)             | 74 (33 to 140)             | 284 (124 to 543)            | 9 (4 to 18)            | 1034 (470 to 1789)            | 37 (13 to 83)            |
| Sierra Leone          | 14583<br>(6174 to 27854)      | 1563<br>(522 to 3411)      | 3535<br>(1189 to 7940)      | 113 (33 to 262)        | 21045<br>(8069 to 41078)      | 761 (230 to 1822)        |
| South Africa          | 310618<br>(179043 to 479891)  | 34812<br>(16967 to 62105)  | 128802<br>(64882 to 224391) | 3909<br>(1857 to 7172) | 644839<br>(347993 to 1016254) | 22434<br>(9425 to 48918) |

|                                        |                                         |                                      |                                       |                                   |                                         |                                     |
|----------------------------------------|-----------------------------------------|--------------------------------------|---------------------------------------|-----------------------------------|-----------------------------------------|-------------------------------------|
| South Sudan                            | 20595<br>(9933 to<br>36251)             | 2271<br>(901 to<br>4552)             | 5464<br>(2230 to<br>11037)            | 174 (63<br>to 369)                | 27600<br>(12146 to<br>50506)            | 978 (345<br>to 2223)                |
| Togo                                   | 18228<br>(9036 to<br>32045)             | 2023<br>(800 to<br>4130)             | 4385<br>(1764 to<br>8992)             | 142 (48<br>to 305)                | 28377<br>(12217 to<br>52658)            | 1036<br>(352 to<br>2440)            |
| Uganda                                 | 68074<br>(30470 to<br>123762)           | 7299<br>(2633 to<br>15127)           | 16354<br>(6163 to<br>34339)           | 523<br>(173 to<br>1148)           | 84728<br>(34822 to<br>162317)           | 3052<br>(976 to<br>7109)            |
| United<br>Republic of<br>Tanzania      | 121912<br>(62482 to<br>208169)          | 13465<br>(5487 to<br>26494)          | 36105<br>(15629 to<br>72083)          | 1141<br>(409 to<br>2405)          | 184086<br>(82431 to<br>328140)          | 6593<br>(2312 to<br>15243)          |
| Zambia                                 | 35991<br>(17353 to<br>63778)            | 3942<br>(1508 to<br>8090)            | 9949<br>(4086 to<br>19882)            | 323<br>(113 to<br>697)            | 47954<br>(20900 to<br>88044)            | 1728<br>(589 to<br>3953)            |
| Zimbabwe                               | 37572<br>(19639 to<br>63344)            | 4079<br>(1685 to<br>7979)            | 8667<br>(3657 to<br>17790)            | 274 (98<br>to 580)                | 54391<br>(23806 to<br>98702)            | 1937<br>(689 to<br>4484)            |
| The Americas                           | 10187105<br>(5732953<br>to<br>15709360) | 1181586<br>(568778<br>to<br>2093267) | 5628341<br>(2897828<br>to<br>9321606) | 161240<br>(80145<br>to<br>279076) | 17395805<br>(8698214<br>to<br>28824471) | 613766<br>(246600<br>to<br>1343962) |
| Antigua and<br>Barbuda                 | 503 (260<br>to 830)                     | 61 (27 to<br>116)                    | 96 (44 to<br>175)                     | 3 (1 to<br>6)                     | 1273 (607<br>to 2168)                   | 45 (17 to<br>101)                   |
| Argentina                              | 262329<br>(126688 to<br>451237)         | 30616<br>(12963<br>to<br>59082)      | 177989<br>(77740 to<br>335389)        | 5303<br>(2191<br>to<br>10437)     | 625917<br>(291074 to<br>1093626)        | 22352<br>(8369 to<br>50367)         |
| Bahamas                                | 2474 (1330<br>to 3950)                  | 298 (137<br>to 549)                  | 449 (224<br>to 804)                   | 14 (6 to<br>29)                   | 5926 (2919<br>to 9802)                  | 210 (81<br>to 465)                  |
| Barbados                               | 2376 (1242<br>to 3857)                  | 284 (129<br>to 526)                  | 471 (231<br>to 845)                   | 14 (6 to<br>28)                   | 7000 (3388<br>to 11560)                 | 238 (92<br>to 527)                  |
| Belize                                 | 2404 (1303<br>to 3762)                  | 279 (129<br>to 511)                  | 382 (189<br>to 675)                   | 12 (5 to<br>24)                   | 4419 (2173<br>to 7147)                  | 156 (61<br>to 345)                  |
| Bolivia<br>(Plurinational<br>State of) | 57317<br>(29490 to<br>94187)            | 6607<br>(2911 to<br>12466)           | 10619<br>(4981 to<br>19298)           | 337<br>(134 to<br>674)            | 121092<br>(59593 to<br>198515)          | 4313<br>(1669 to<br>9611)           |
| Brazil                                 | 1520278<br>(816496 to<br>2456595)       | 182280<br>(83734<br>to<br>337309)    | 261936<br>(130106 to<br>462127)       | 7996<br>(3772<br>to<br>14637)     | 3205837<br>(1642826<br>to<br>5289373)   | 109456<br>(43766<br>to<br>243250)   |
| Canada                                 | 391284<br>(207213 to<br>632944)         | 46728<br>(21542                      | 399558<br>(184057 to<br>733296)       | 11658<br>(5218                    | 550545<br>(254215 to<br>969187)         | 19062<br>(7573 to<br>41840)         |

|                       |                                 |                                 |                               |                              |                                  |                             |
|-----------------------|---------------------------------|---------------------------------|-------------------------------|------------------------------|----------------------------------|-----------------------------|
|                       |                                 | to<br>85347)                    |                               | to<br>21452)                 |                                  |                             |
| Chile                 | 142440<br>(71391 to<br>237419)  | 16822<br>(7482 to<br>31360)     | 94656<br>(42533 to<br>174790) | 2826<br>(1209<br>to<br>5363) | 342119<br>(164185 to<br>582151)  | 12281<br>(4748 to<br>27502) |
| Colombia              | 311577<br>(156798 to<br>520706) | 36964<br>(15925<br>to<br>70549) | 33368<br>(15753 to<br>60810)  | 1038<br>(395 to<br>2143)     | 637591<br>(300616 to<br>1079644) | 21542<br>(8087 to<br>48647) |
| Costa Rica            | 30115<br>(15053 to<br>49822)    | 3573<br>(1562 to<br>6755)       | 3763<br>(1795 to<br>6808)     | 117 (45<br>to 238)           | 67756<br>(31557 to<br>115232)    | 2307<br>(872 to<br>5199)    |
| Cuba                  | 91468<br>(48985 to<br>145803)   | 10889<br>(5094 to<br>19872)     | 16981<br>(8288 to<br>30387)   | 502<br>(201 to<br>992)       | 246645<br>(119192 to<br>411772)  | 8265<br>(3192 to<br>18453)  |
| Dominica              | 498 (266<br>to 793)             | 58 (27 to<br>108)               | 92 (45 to<br>165)             | 3 (1 to<br>6)                | 1277 (633<br>to 2077)            | 43 (17 to<br>94)            |
| Dominican<br>Republic | 49943<br>(24641 to<br>84538)    | 5906<br>(2531 to<br>11363)      | 9166<br>(4230 to<br>16946)    | 292<br>(108 to<br>599)       | 109592<br>(49325 to<br>188335)   | 3857<br>(1416 to<br>8771)   |
| Ecuador               | 100824<br>(58008 to<br>151615)  | 11777<br>(5677 to<br>20710)     | 24883<br>(12775 to<br>42883)  | 781<br>(333 to<br>1477)      | 253249<br>(133982 to<br>389205)  | 9078<br>(3665 to<br>20005)  |
| El Salvador           | 37121<br>(18393 to<br>61714)    | 4262<br>(1841 to<br>8085)       | 3922<br>(1871 to<br>7076)     | 120 (44<br>to 245)           | 75919<br>(34335 to<br>129583)    | 2525<br>(953 to<br>5690)    |
| Grenada               | 606 (321<br>to 994)             | 73 (33 to<br>138)               | 103 (49 to<br>190)            | 3 (1 to<br>7)                | 1411 (685<br>to 2378)            | 50 (19 to<br>111)           |
| Guatemala             | 65306<br>(30099 to<br>117189)   | 7292<br>(2736 to<br>14865)      | 6081<br>(2516 to<br>12016)    | 192 (65<br>to 408)           | 103589<br>(44937 to<br>186608)   | 3552<br>(1224 to<br>8217)   |
| Guyana                | 3748 (1897<br>to 6286)          | 438 (188<br>to 836)             | 587 (271<br>to 1087)          | 19 (7 to<br>38)              | 7705 (3561<br>to 13248)          | 272 (101<br>to 612)         |
| Haiti                 | 21035<br>(8248 to<br>41345)     | 2387<br>(750 to<br>5244)        | 3033<br>(1073 to<br>6760)     | 98 (28<br>to 231)            | 34940<br>(12578 to<br>71493)     | 1249<br>(342 to<br>3047)    |
| Honduras              | 38506<br>(17742 to<br>67247)    | 4314<br>(1669 to<br>8665)       | 3722<br>(1597 to<br>7201)     | 118 (40<br>to 250)           | 64369<br>(28054 to<br>114204)    | 2236<br>(788 to<br>5124)    |
| Jamaica               | 18673<br>(10173 to<br>29589)    | 2177<br>(1011 to<br>3987)       | 3185<br>(1611 to<br>5637)     | 96 (38<br>to 192)            | 41629<br>(21121 to<br>67883)     | 1398<br>(559 to<br>3076)    |

|                                          |                                       |                                     |                                       |                                   |                                        |                                    |
|------------------------------------------|---------------------------------------|-------------------------------------|---------------------------------------|-----------------------------------|----------------------------------------|------------------------------------|
| Mexico                                   | 806363<br>(416624 to<br>1313358)      | 94838<br>(42833<br>to<br>176450)    | 107705<br>(52610 to<br>191065)        | 3381<br>(1571<br>to<br>6287)      | 1681697<br>(818145 to<br>2809029)      | 59546<br>(23486<br>to<br>131464)   |
| Nicaragua                                | 31043<br>(14981 to<br>52750)          | 3574<br>(1485 to<br>6991)           | 3195<br>(1455 to<br>5945)             | 103 (38<br>to 214)                | 54211<br>(24729 to<br>93545)           | 1891<br>(704 to<br>4272)           |
| Panama                                   | 21388<br>(10729 to<br>35559)          | 2505<br>(1064 to<br>4744)           | 2717<br>(1273 to<br>5054)             | 85 (32<br>to 175)                 | 48615<br>(22822 to<br>82531)           | 1647<br>(616 to<br>3742)           |
| Paraguay                                 | 37334<br>(19362 to<br>62046)          | 4379<br>(1928 to<br>8385)           | 5656<br>(2653 to<br>10424)            | 177 (69<br>to 361)                | 67365<br>(32489 to<br>114007)          | 2316<br>(882 to<br>5204)           |
| Peru                                     | 176617<br>(85854 to<br>293398)        | 20613<br>(8820 to<br>39411)         | 37532<br>(17207 to<br>68692)          | 1151<br>(450 to<br>2338)          | 420532<br>(195319 to<br>707296)        | 14310<br>(5360 to<br>32051)        |
| Saint Kitts<br>and Nevis                 | 393 (207<br>to 642)                   | 48 (22 to<br>89)                    | 76 (37 to<br>135)                     | 2 (1 to<br>5)                     | 985 (483 to<br>1637)                   | 35 (14 to<br>79)                   |
| Saint Lucia                              | 1201 (626<br>to 1952)                 | 144 (65<br>to 267)                  | 211 (101<br>to 381)                   | 7 (3 to<br>13)                    | 2903 (1386<br>to 4811)                 | 100 (38<br>to 223)                 |
| Saint Vincent<br>and the<br>Grenadines   | 677 (343<br>to 1113)                  | 81 (36 to<br>153)                   | 128 (59 to<br>238)                    | 4 (2 to<br>8)                     | 1708 (802<br>to 2869)                  | 59 (23 to<br>133)                  |
| Suriname                                 | 3316 (1682<br>to 5443)                | 393 (172<br>to 738)                 | 600 (285<br>to 1104)                  | 19 (7 to<br>39)                   | 7981 (3698<br>to 13342)                | 278 (105<br>to 620)                |
| Trinidad and<br>Tobago                   | 10855<br>(5963 to<br>17025)           | 1303<br>(610 to<br>2373)            | 2079<br>(1046 to<br>3665)             | 64 (26<br>to 125)                 | 28755<br>(14625 to<br>46427)           | 990 (398<br>to 2171)               |
| United States<br>of America              | 5769970<br>(3443558<br>to<br>8463897) | 658535<br>(334677<br>to<br>1114745) | 4376671<br>(2312452<br>to<br>7040919) | 123589<br>(63663<br>to<br>207798) | 8142942<br>(4183684<br>to<br>13276933) | 293421<br>(121874<br>to<br>629821) |
| Uruguay                                  | 23172<br>(11469 to<br>39315)          | 2700<br>(1148 to<br>5153)           | 16871<br>(7401 to<br>31863)           | 485<br>(201 to<br>943)            | 62023<br>(28970 to<br>107391)          | 2160<br>(813 to<br>4817)           |
| Venezuela<br>(Bolivarian<br>Republic of) | 153952<br>(75517 to<br>260440)        | 18388<br>(7819 to<br>35324)         | 19858<br>(9268 to<br>36757)           | 630<br>(234 to<br>1297)           | 366290<br>(169507 to<br>629464)        | 12526<br>(4675 to<br>28309)        |
| Eastern<br>Mediterranean                 | 3560620<br>(1863280<br>to<br>5842942) | 412333<br>(183675<br>to<br>773223)  | 926358<br>(431363 to<br>1694518)      | 29197<br>(12253<br>to<br>56950)   | 4618052<br>(2266815<br>to<br>7707889)  | 161816<br>(62825<br>to<br>359119)  |

|                               |                                  |                                  |                                |                               |                                  |                                 |
|-------------------------------|----------------------------------|----------------------------------|--------------------------------|-------------------------------|----------------------------------|---------------------------------|
| Afghanistan                   | 91949<br>(44696 to<br>161118)    | 9077<br>(3474 to<br>18741)       | 19898<br>(8602 to<br>38936)    | 588<br>(214 to<br>1249)       | 102633<br>(47629 to<br>179971)   | 3486<br>(1246 to<br>7850)       |
| Bahrain                       | 14222<br>(7646 to<br>22510)      | 1753<br>(835 to<br>3139)         | 4765<br>(2293 to<br>8306)      | 156 (67<br>to 300)            | 19623<br>(10073 to<br>31019)     | 704 (287<br>to 1542)            |
| Djibouti                      | 2266 (1004<br>to 4215)           | 265 (95<br>to 552)               | 807 (286<br>to 1730)           | 27 (9 to<br>60)               | 3538 (1413<br>to 6838)           | 131 (41<br>to 310)              |
| Egypt                         | 733212<br>(396707 to<br>1150359) | 85811<br>(39891<br>to<br>154744) | 182500<br>(88608 to<br>322139) | 5881<br>(2529<br>to<br>11104) | 956026<br>(495363 to<br>1510445) | 34210<br>(13992<br>to<br>74628) |
| Iran (Islamic<br>Republic of) | 632255<br>(348083 to<br>1024329) | 74570<br>(34185<br>to<br>137900) | 160062<br>(75038 to<br>290751) | 4902<br>(2251<br>to<br>9190)  | 794664<br>(398822 to<br>1329914) | 27310<br>(10801<br>to<br>60742) |
| Iraq                          | 244185<br>(127664 to<br>390261)  | 27751<br>(12440<br>to<br>51553)  | 62227<br>(29766 to<br>110485)  | 1939<br>(811 to<br>3739)      | 303851<br>(146488 to<br>493879)  | 10499<br>(4156 to<br>23192)     |
| Jordan                        | 90692<br>(50870 to<br>139286)    | 10425<br>(4976 to<br>18612)      | 23074<br>(11697 to<br>38596)   | 738<br>(327 to<br>1392)       | 114445<br>(60647 to<br>178119)   | 4053<br>(1660 to<br>8776)       |
| Kuwait                        | 47722<br>(27284 to<br>72461)     | 5716<br>(2805 to<br>9978)        | 12604<br>(6459 to<br>21108)    | 403<br>(181 to<br>748)        | 55789<br>(30529 to<br>85040)     | 1965<br>(816 to<br>4220)        |
| Lebanon                       | 36669<br>(19504 to<br>58741)     | 4201<br>(1934 to<br>7673)        | 12596<br>(6259 to<br>22215)    | 374<br>(162 to<br>707)        | 67725<br>(34029 to<br>108183)    | 2260<br>(902 to<br>4937)        |
| Libya                         | 54889<br>(29553 to<br>87265)     | 6412<br>(2994 to<br>11634)       | 15446<br>(7638 to<br>26678)    | 477<br>(207 to<br>916)        | 78567<br>(41058 to<br>125083)    | 2702<br>(1100 to<br>5886)       |
| Morocco                       | 243729<br>(124207 to<br>406199)  | 28687<br>(12699<br>to<br>54099)  | 64073<br>(29951 to<br>119413)  | 2010<br>(826 to<br>3933)      | 365284<br>(175239 to<br>613377)  | 12750<br>(4882 to<br>28577)     |
| Oman                          | 35941<br>(18959 to<br>57728)     | 4227<br>(1944 to<br>7720)        | 8689<br>(4269 to<br>15038)     | 286<br>(118 to<br>562)        | 30966<br>(16271 to<br>49159)     | 1119<br>(452 to<br>2429)        |
| Pakistan                      | 438392<br>(191479 to<br>825070)  | 48178<br>(16977<br>to<br>103263) | 122099<br>(47568 to<br>254741) | 3796<br>(1379<br>to<br>8242)  | 651312<br>(270421 to<br>1239388) | 22631<br>(7525 to<br>52379)     |

|                         |                                        |                                      |                                       |                                  |                                         |                                     |
|-------------------------|----------------------------------------|--------------------------------------|---------------------------------------|----------------------------------|-----------------------------------------|-------------------------------------|
| Qatar                   | 32486<br>(18187 to<br>49740)           | 3863<br>(1890 to<br>6822)            | 8625<br>(4235 to<br>14425)            | 281<br>(119 to<br>546)           | 26481<br>(14145 to<br>40885)            | 943 (385<br>to 2023)                |
| Saudi Arabia            | 336912<br>(186462 to<br>521652)        | 40143<br>(19391<br>to<br>71193)      | 87163<br>(43954 to<br>149223)         | 2813<br>(1222<br>to<br>5238)     | 358678<br>(190902 to<br>571282)         | 12821<br>(5321 to<br>27665)         |
| Sudan                   | 169081<br>(86870 to<br>284040)         | 18923<br>(8178 to<br>36402)          | 39502<br>(17567 to<br>73760)          | 1248<br>(490 to<br>2552)         | 194836<br>(93113 to<br>329586)          | 6818<br>(2572 to<br>15313)          |
| Syrian Arab<br>Republic | 93323<br>(47415 to<br>154936)          | 10986<br>(4904 to<br>20804)          | 27273<br>(12656 to<br>50313)          | 860<br>(363 to<br>1675)          | 156930<br>(76143 to<br>256009)          | 5523<br>(2153 to<br>12307)          |
| Tunisia                 | 86344<br>(44218 to<br>142032)          | 10252<br>(4561 to<br>19171)          | 26927<br>(12570 to<br>49146)          | 828<br>(343 to<br>1615)          | 155210<br>(75974 to<br>252717)          | 5323<br>(2088 to<br>11825)          |
| United Arab<br>Emirates | 109433<br>(62110 to<br>170933)         | 13819<br>(6830 to<br>24108)          | 32997<br>(16130 to<br>56646)          | 1105<br>(472 to<br>2106)         | 105188<br>(56774 to<br>164291)          | 3843<br>(1570 to<br>8218)           |
| Yemen                   | 66918<br>(30362 to<br>120066)          | 7277<br>(2672 to<br>15115)           | 15030<br>(5818 to<br>30868)           | 484<br>(164 to<br>1077)          | 76307<br>(31784 to<br>142701)           | 2723<br>(877 to<br>6301)            |
| Europe                  | 9300538<br>(4900638<br>to<br>15251798) | 1120436<br>(508972<br>to<br>2069504) | 3077117<br>(1405687<br>to<br>5731746) | 89258<br>(38516<br>to<br>169528) | 17248229<br>(8339493<br>to<br>29272616) | 587678<br>(230484<br>to<br>1303807) |
| Albania                 | 26407<br>(12977 to<br>45618)           | 3236<br>(1406 to<br>6161)            | 4927<br>(2269 to<br>9286)             | 150 (60<br>to 295)               | 40066<br>(19475 to<br>66975)            | 1353<br>(530 to<br>2987)            |
| Andorra                 | 816 (411<br>to 1369)                   | 100 (44<br>to 189)                   | 367 (158<br>to 698)                   | 11 (4 to<br>21)                  | 1575 (720<br>to 2788)                   | 56 (21 to<br>124)                   |
| Armenia                 | 26580<br>(14287 to<br>42959)           | 3202<br>(1475 to<br>5912)            | 7284<br>(3585 to<br>12991)            | 223 (96<br>to 433)               | 38918<br>(19489 to<br>65123)            | 1335<br>(530 to<br>2982)            |
| Austria                 | 67836<br>(34252 to<br>116615)          | 8159<br>(3497 to<br>15605)           | 36031<br>(15443 to<br>70337)          | 1029<br>(415 to<br>2037)         | 171285<br>(80272 to<br>302307)          | 5961<br>(2236 to<br>13361)          |
| Azerbaijan              | 75586<br>(38133 to<br>124274)          | 9204<br>(4122 to<br>17114)           | 18403<br>(8674 to<br>33880)           | 598<br>(248 to<br>1189)          | 94139<br>(46068 to<br>160613)           | 3433<br>(1350 to<br>7588)           |
| Belarus                 | 95322<br>(51496 to<br>155727)          | 11635<br>(5323 to<br>21430)          | 25293<br>(12584 to<br>45573)          | 752<br>(325 to<br>1435)          | 175154<br>(87246 to<br>291913)          | 5972<br>(2383 to<br>13382)          |



|                           |                                  |                                   |                                 |                                |                                   |                                  |
|---------------------------|----------------------------------|-----------------------------------|---------------------------------|--------------------------------|-----------------------------------|----------------------------------|
| Belgium                   | 96614<br>(49230 to<br>164797)    | 11479<br>(4900 to<br>22019)       | 43424<br>(18401 to<br>85261)    | 1219<br>(492 to<br>2396)       | 208002<br>(97220 to<br>366698)    | 7052<br>(2634 to<br>15729)       |
| Bosnia and<br>Herzegovina | 33223<br>(16940 to<br>56027)     | 4112<br>(1845 to<br>7706)         | 6990<br>(3281 to<br>12984)      | 210 (86<br>to 411)             | 58493<br>(29023 to<br>97733)      | 1963<br>(772 to<br>4344)         |
| Bulgaria                  | 82408<br>(43028 to<br>135414)    | 10270<br>(4694 to<br>18800)       | 17865<br>(8513 to<br>32754)     | 527<br>(219 to<br>1016)        | 146158<br>(73580 to<br>238769)    | 4839<br>(1947 to<br>10815)       |
| Croatia                   | 52741<br>(28282 to<br>86576)     | 6473<br>(2990 to<br>11856)        | 11226<br>(5416 to<br>20239)     | 326<br>(139 to<br>624)         | 91670<br>(46213 to<br>147351)     | 2982<br>(1195 to<br>6525)        |
| Cyprus                    | 9185 (4383<br>to 16379)          | 1126<br>(454 to<br>2214)          | 3601<br>(1463 to<br>7293)       | 108 (41<br>to 219)             | 16462<br>(7137 to<br>29885)       | 594 (213<br>to 1355)             |
| Czechia                   | 133518<br>(69846 to<br>217396)   | 16599<br>(7773 to<br>30078)       | 28703<br>(14294 to<br>50338)    | 840<br>(358 to<br>1588)        | 233603<br>(120114 to<br>371208)   | 7609<br>(3091 to<br>16432)       |
| Denmark                   | 58431<br>(29638 to<br>99832)     | 6947<br>(3002 to<br>13266)        | 21661<br>(9037 to<br>42528)     | 627<br>(251 to<br>1236)        | 99693<br>(46516 to<br>175757)     | 3498<br>(1310 to<br>7864)        |
| Estonia                   | 15375<br>(8753 to<br>24224)      | 1809<br>(858 to<br>3236)          | 4633<br>(2393 to<br>8222)       | 133 (58<br>to 248)             | 29930<br>(15576 to<br>48657)      | 994 (401<br>to 2188)             |
| Finland                   | 47064<br>(24067 to<br>78909)     | 5543<br>(2397 to<br>10451)        | 23920<br>(10351 to<br>46809)    | 671<br>(276 to<br>1307)        | 118767<br>(56321 to<br>203692)    | 3986<br>(1525 to<br>8903)        |
| France                    | 575659<br>(300937 to<br>956819)  | 68036<br>(30007<br>to<br>127827)  | 247495<br>(104995 to<br>484687) | 6989<br>(2836<br>to<br>13669)  | 1246588<br>(593345 to<br>2141999) | 41677<br>(15689<br>to<br>93742)  |
| Georgia                   | 27213<br>(14479 to<br>45551)     | 3155<br>(1420 to<br>5900)         | 9180<br>(4304 to<br>16891)      | 267<br>(109 to<br>525)         | 48457<br>(23439 to<br>84226)      | 1598<br>(620 to<br>3556)         |
| Germany                   | 948506<br>(489442 to<br>1580790) | 115090<br>(51686<br>to<br>213675) | 409168<br>(177230 to<br>778329) | 11588<br>(4832<br>to<br>22122) | 2005598<br>(991329 to<br>3354211) | 66826<br>(25786<br>to<br>149272) |
| Greece                    | 95371<br>(47244 to<br>164086)    | 11372<br>(4851 to<br>21781)       | 49340<br>(20797 to<br>94899)    | 1366<br>(558 to<br>2689)       | 233815<br>(110079 to<br>394846)   | 7530<br>(2830 to<br>16947)       |
| Hungary                   | 130491<br>(73149 to<br>206859)   | 15887<br>(7514 to<br>28697)       | 26438<br>(13365 to<br>46588)    | 770<br>(331 to<br>1446)        | 217750<br>(113733 to<br>348403)   | 7108<br>(2878 to<br>15459)       |

|                 |                           |                         |                          |                      |                             |                        |
|-----------------|---------------------------|-------------------------|--------------------------|----------------------|-----------------------------|------------------------|
| Iceland         | 3372 (1746 to 5581)       | 400 (177 to 751)        | 1370 (608 to 2597)       | 40 (17 to 76)        | 6003 (2744 to 10553)        | 216 (84 to 480)        |
| Ireland         | 49265 (25120 to 82601)    | 5859 (2585 to 10902)    | 17690 (7795 to 33705)    | 520 (215 to 999)     | 82380 (39729 to 140403)     | 2866 (1109 to 6449)    |
| Israel          | 70215 (34508 to 119585)   | 8278 (3504 to 15915)    | 25176 (10909 to 48218)   | 737 (298 to 1439)    | 121586 (56332 to 213917)    | 4301 (1630 to 9680)    |
| Italy           | 512845 (241981 to 909900) | 62556 (25848 to 121365) | 223152 (93731 to 439277) | 6233 (2644 to 11989) | 1221241 (565514 to 2156283) | 40703 (15359 to 91810) |
| Kazakhstan      | 142810 (77266 to 226533)  | 16848 (7803 to 30845)   | 36378 (17898 to 64412)   | 1144 (485 to 2217)   | 189759 (95091 to 316181)    | 6635 (2668 to 14578)   |
| Kyrgyzstan      | 30430 (15149 to 52143)    | 3504 (1497 to 6811)     | 7068 (3192 to 13406)     | 226 (87 to 459)      | 35263 (16268 to 62264)      | 1250 (472 to 2866)     |
| Latvia          | 23065 (12888 to 36736)    | 2760 (1302 to 4993)     | 6529 (3216 to 11585)     | 187 (80 to 354)      | 44578 (22494 to 73878)      | 1482 (601 to 3258)     |
| Lithuania       | 30947 (16009 to 51244)    | 3736 (1676 to 6884)     | 8809 (4235 to 16066)     | 254 (107 to 486)     | 62022 (30491 to 101928)     | 2028 (817 to 4521)     |
| Luxembourg      | 5156 (2621 to 8851)       | 624 (271 to 1187)       | 2258 (987 to 4375)       | 66 (27 to 131)       | 10125 (4806 to 17412)       | 345 (130 to 773)       |
| Malta           | 4266 (2076 to 7418)       | 517 (217 to 993)        | 1742 (707 to 3488)       | 50 (20 to 100)       | 8366 (3880 to 14717)        | 291 (106 to 659)       |
| Monaco          | 460 (233 to 775)          | 55 (25 to 102)          | 220 (100 to 414)         | 6 (3 to 12)          | 1087 (522 to 1823)          | 37 (14 to 82)          |
| Montenegro      | 7540 (4055 to 12174)      | 927 (430 to 1696)       | 1428 (697 to 2530)       | 43 (18 to 83)        | 11517 (5905 to 18387)       | 389 (158 to 857)       |
| Netherlands     | 134076 (64136 to 232387)  | 16114 (6727 to 31277)   | 67225 (27424 to 135185)  | 1964 (780 to 3869)   | 332864 (152982 to 579915)   | 11385 (4204 to 25851)  |
| North Macedonia | 21849 (11317 to 35976)    | 2703 (1232 to 4958)     | 4528 (2193 to 8339)      | 140 (58 to 270)      | 34862 (17668 to 57037)      | 1195 (482 to 2610)     |
| Norway          | 36828 (18055 to 63866)    | 4338 (1827 to 8462)     | 15609 (6386 to 31103)    | 445 (181 to 875)     | 78580 (35357 to 140709)     | 2745 (1008 to 6218)    |

|                        |                                   |                                   |                                 |                                |                                       |                                  |
|------------------------|-----------------------------------|-----------------------------------|---------------------------------|--------------------------------|---------------------------------------|----------------------------------|
| Poland                 | 475528<br>(256587 to<br>768822)   | 58226<br>(27460<br>to<br>105567)  | 99947<br>(49731 to<br>177335)   | 2935<br>(1392<br>to<br>5271)   | 784622<br>(408542 to<br>1249606)      | 25876<br>(10503<br>to<br>56232)  |
| Portugal               | 106018<br>(50928 to<br>184884)    | 12710<br>(5377 to<br>24431)       | 43734<br>(17875 to<br>87242)    | 1229<br>(491 to<br>2437)       | 215362<br>(97405 to<br>385742)        | 7347<br>(2737 to<br>16798)       |
| Republic of<br>Moldova | 36719<br>(19417 to<br>59303)      | 4490<br>(2072 to<br>8226)         | 9544<br>(4635 to<br>17471)      | 287<br>(121 to<br>559)         | 65915<br>(32956 to<br>109651)         | 2279<br>(907 to<br>5048)         |
| Romania                | 244640<br>(143898 to<br>384876)   | 29756<br>(14352<br>to<br>53244)   | 50337<br>(25851 to<br>88618)    | 1472<br>(633 to<br>2746)       | 397953<br>(210842 to<br>632656)       | 13021<br>(5379 to<br>28356)      |
| Russian<br>Federation  | 1713553<br>(953477 to<br>2718512) | 207111<br>(97896<br>to<br>372333) | 426926<br>(212011 to<br>759289) | 12681<br>(6043<br>to<br>23062) | 2646151<br>(1259737<br>to<br>4565082) | 95648<br>(38770<br>to<br>210233) |
| San Marino             | 335 (171<br>to 558)               | 40 (18 to<br>74)                  | 146 (64 to<br>275)              | 4 (2 to<br>8)                  | 692 (333 to<br>1181)                  | 23 (9 to<br>52)                  |
| Serbia                 | 104108<br>(53589 to<br>168696)    | 12927<br>(5937 to<br>23587)       | 21706<br>(10308 to<br>39566)    | 657<br>(275 to<br>1241)        | 174464<br>(86486 to<br>279905)        | 5889<br>(2380 to<br>12814)       |
| Slovakia               | 61789<br>(32623 to<br>101050)     | 7728<br>(3554 to<br>14128)        | 12587<br>(6199 to<br>22770)     | 380<br>(160 to<br>727)         | 104184<br>(53673 to<br>167990)        | 3487<br>(1389 to<br>7622)        |
| Slovenia               | 25251<br>(13476 to<br>40720)      | 3061<br>(1427 to<br>5580)         | 5816<br>(2866 to<br>10262)      | 168 (72<br>to 319)             | 45647<br>(23435 to<br>73039)          | 1461<br>(587 to<br>3186)         |
| Spain                  | 360956<br>(185577 to<br>606277)   | 43697<br>(19477<br>to<br>81493)   | 210709<br>(92977 to<br>396450)  | 5950<br>(2483<br>to<br>11408)  | 1012743<br>(423841 to<br>1934282)     | 34181<br>(13137<br>to<br>76217)  |
| Sweden                 | 86434<br>(43704 to<br>145525)     | 10147<br>(4444 to<br>19321)       | 38299<br>(16870 to<br>74026)    | 1051<br>(443 to<br>2005)       | 168251<br>(77567 to<br>291581)        | 5484<br>(2067 to<br>12386)       |
| Switzerland            | 78780<br>(38484 to<br>137132)     | 9488<br>(4043 to<br>18201)        | 31294<br>(12633 to<br>62056)    | 893<br>(348 to<br>1781)        | 148527<br>(67930 to<br>261127)        | 5028<br>(1841 to<br>11430)       |
| Tajikistan             | 22426<br>(9791 to<br>42474)       | 2555<br>(906 to<br>5472)          | 4909<br>(1791 to<br>10687)      | 161 (50<br>to 364)             | 23506<br>(9382 to<br>46122)           | 868 (281<br>to 2042)             |

|                |                                       |                                     |                                   |                                  |                                         |                                    |
|----------------|---------------------------------------|-------------------------------------|-----------------------------------|----------------------------------|-----------------------------------------|------------------------------------|
| Turkey         | 834448<br>(443730 to<br>1311407)      | 98759<br>(45602<br>to<br>180426)    | 223524<br>(110106 to<br>387268)   | 6823<br>(2964<br>to<br>12987)    | 1360677<br>(683969 to<br>2168981)       | 45887<br>(18261<br>to<br>100717)   |
| Turkmenistan   | 33653<br>(17855 to<br>54782)          | 3954<br>(1822 to<br>7345)           | 8302<br>(4053 to<br>14814)        | 266<br>(112 to<br>517)           | 39790<br>(20218 to<br>65955)            | 1394<br>(548 to<br>3078)           |
| Ukraine        | 508052<br>(284467 to<br>808395)       | 63130<br>(29428<br>to<br>114349)    | 124081<br>(61204 to<br>222142)    | 3696<br>(1578<br>to<br>6995)     | 851511<br>(435021 to<br>1395905)        | 29065<br>(11849<br>to<br>64261)    |
| United Kingdom | 758847<br>(383385 to<br>1258988)      | 88845<br>(40316<br>to<br>164831)    | 309918<br>(141692 to<br>572290)   | 8805<br>(4048<br>to<br>16163)    | 1505220<br>(734024 to<br>2518609)       | 51622<br>(20429<br>to<br>113655)   |
| Uzbekistan     | 177530<br>(91344 to<br>293409)        | 21160<br>(9466 to<br>39838)         | 40211<br>(18190 to<br>73900)      | 1341<br>(545 to<br>2669)         | 186657<br>(87458 to<br>326641)          | 6882<br>(2630 to<br>15430)         |
| Southeast Asia | 4736245<br>(2336292<br>to<br>8245158) | 553212<br>(224985<br>to<br>1093453) | 1820023<br>(741420 to<br>3736221) | 57548<br>(22306<br>to<br>118739) | 10030775<br>(4241270<br>to<br>18468603) | 349076<br>(116302<br>to<br>793237) |
| Bangladesh     | 300385<br>(124528 to<br>577032)       | 35314<br>(11891<br>to<br>75505)     | 81424<br>(27858 to<br>185193)     | 2601<br>(770 to<br>6117)         | 493413<br>(179142 to<br>1010516)        | 17337<br>(4856 to<br>42703)        |
| Bhutan         | 2669 (1196<br>to 4840)                | 310 (118<br>to 635)                 | 620 (238<br>to 1290)              | 20 (7 to<br>43)                  | 4301 (1767<br>to 7910)                  | 151 (51<br>to 352)                 |
| India          | 2700625<br>(1350094<br>to<br>4666679) | 306160<br>(125635<br>to<br>603530)  | 1034895<br>(429656 to<br>2110525) | 32079<br>(12682<br>to<br>65431)  | 6893718<br>(2945986<br>to<br>12599482)  | 237933<br>(80220<br>to<br>536557)  |
| Indonesia      | 1059023<br>(544679 to<br>1804483)     | 131044<br>(55598<br>to<br>252764)   | 386035<br>(158052 to<br>779003)   | 12985<br>(5245<br>to<br>26358)   | 1308679<br>(562269 to<br>2380201)       | 48144<br>(16403<br>to<br>108251)   |
| Maldives       | 1561 (714<br>to 2846)                 | 194 (75<br>to 394)                  | 719 (270<br>to 1474)              | 24 (8 to<br>53)                  | 1916 (786<br>to 3645)                   | 71 (23 to<br>165)                  |
| Myanmar        | 140088<br>(62012 to<br>255328)        | 16688<br>(6086 to<br>34396)         | 52811<br>(18961 to<br>114900)     | 1692<br>(538 to<br>3816)         | 226252<br>(87824 to<br>442249)          | 7962<br>(2404 to<br>18505)         |
| Nepal          | 81679<br>(35161 to<br>154871)         | 9483<br>(3290 to<br>20250)          | 17244<br>(6148 to<br>37924)       | 549<br>(171 to<br>1240)          | 116071<br>(42750 to<br>229407)          | 4074<br>(1174 to<br>9787)          |

|                                        |                                        |                                     |                                        |                                   |                                         |                                     |
|----------------------------------------|----------------------------------------|-------------------------------------|----------------------------------------|-----------------------------------|-----------------------------------------|-------------------------------------|
| Sri Lanka                              | 80396<br>(38874 to<br>134033)          | 9453<br>(3800 to<br>18362)          | 40013<br>(15462 to<br>84945)           | 1229<br>(444 to<br>2640)          | 159116<br>(64945 to<br>292173)          | 5305<br>(1742 to<br>12002)          |
| Thailand                               | 368384<br>(178576 to<br>641880)        | 44406<br>(18451<br>to<br>87226)     | 205725<br>(84636 to<br>419573)         | 6352<br>(2438<br>to<br>12998)     | 825560<br>(355314 to<br>1498931)        | 28039<br>(9416 to<br>64758)         |
| Timor-Leste                            | 1434 (459<br>to 3167)                  | 162 (41<br>to 390)                  | 536 (139<br>to 1394)                   | 17 (4 to<br>44)                   | 1748 (485<br>to 4089)                   | 60 (13 to<br>158)                   |
| Western<br>Pacific                     | 5722976<br>(2229000<br>to<br>11210162) | 708232<br>(245781<br>to<br>1512817) | 4736841<br>(1648912<br>to<br>10488401) | 146686<br>(51592<br>to<br>311432) | 19711581<br>(7011087<br>to<br>39746939) | 701553<br>(204499<br>to<br>1700672) |
| Australia                              | 272644<br>(149934 to<br>429138)        | 31839<br>(15044<br>to<br>57183)     | 257382<br>(124285 to<br>468179)        | 7277<br>(3328<br>to<br>13366)     | 601563<br>(304723 to<br>983752)         | 21225<br>(8598 to<br>46182)         |
| Brunei<br>Darussalam                   | 1614 (647<br>to 3111)                  | 192 (65<br>to 412)                  | 692 (240<br>to 1485)                   | 23 (8 to<br>49)                   | 2984 (1158<br>to 5826)                  | 114 (35<br>to 265)                  |
| Cambodia                               | 32993<br>(13084 to<br>65565)           | 3815<br>(1216 to<br>8368)           | 11184<br>(3695 to<br>25981)            | 360<br>(106 to<br>847)            | 42178<br>(14851 to<br>88424)            | 1462<br>(396 to<br>3574)            |
| China                                  | 3684595<br>(1376321<br>to<br>7358638)  | 466592<br>(158990<br>to<br>1011042) | 3598725<br>(1223341<br>to<br>8050029)  | 113352<br>(39673<br>to<br>241121) | 15385544<br>(5402464<br>to<br>31214066) | 549087<br>(159018<br>to<br>1338763) |
| Cook Islands                           | 223 (125<br>to 343)                    | 26 (12 to<br>46)                    | 109 (55 to<br>187)                     | 3 (1 to<br>6)                     | 425 (222 to<br>672)                     | 14 (6 to<br>30)                     |
| Fiji                                   | 7376 (4051<br>to 11464)                | 870 (415<br>to 1571)                | 3137<br>(1513 to<br>5530)              | 100 (44<br>to 186)                | 11887<br>(5854 to<br>19396)             | 419 (158<br>to 899)                 |
| Japan                                  | 578771<br>(180581 to<br>1255913)       | 68616<br>(19130<br>to<br>156434)    | 346571<br>(97348 to<br>843427)         | 9380<br>(2668<br>to<br>21601)     | 1699962<br>(514939 to<br>3619178)       | 58007<br>(14179<br>to<br>144185)    |
| Kiribati                               | 663 (318<br>to 1116)                   | 80 (34 to<br>153)                   | 199 (84 to<br>390)                     | 7 (3 to<br>13)                    | 792 (340 to<br>1427)                    | 30 (10 to<br>68)                    |
| Lao People's<br>Democratic<br>Republic | 18189<br>(8068 to<br>32264)            | 2116<br>(766 to<br>4317)            | 6927<br>(2580 to<br>14482)             | 228 (75<br>to 506)                | 22450<br>(8936 to<br>43159)             | 806 (244<br>to 1855)                |
| Malaysia                               | 160351<br>(86289 to<br>262295)         | 19049<br>(8377 to<br>35835)         | 74462<br>(33395 to<br>140768)          | 2352<br>(950 to<br>4725)          | 235040<br>(111867 to<br>403398)         | 8134<br>(2961 to<br>18313)          |

|                                  |                           |                        |                          |                        |                            |                        |
|----------------------------------|---------------------------|------------------------|--------------------------|------------------------|----------------------------|------------------------|
| Marshall Islands                 | 268 (119 to 475)          | 32 (13 to 64)          | 93 (37 to 191)           | 3 (1 to 7)             | 344 (139 to 646)           | 13 (4 to 30)           |
| Micronesia (Federated States of) | 729 (385 to 1175)         | 89 (41 to 164)         | 243 (114 to 456)         | 8 (4 to 16)            | 991 (473 to 1677)          | 38 (14 to 83)          |
| Mongolia                         | 15863 (7831 to 27586)     | 1900 (809 to 3681)     | 3802 (1659 to 7205)      | 124 (47 to 250)        | 17113 (7742 to 30672)      | 617 (226 to 1398)      |
| Nauru                            | 60 (30 to 99)             | 7 (3 to 14)            | 17 (8 to 33)             | 0.615 (0.254 to 1.195) | 63 (29 to 109)             | 2 (1 to 5)             |
| New Zealand                      | 45608 (24221 to 74804)    | 5319 (2421 to 9908)    | 46629 (22874 to 80584)   | 1326 (618 to 2370)     | 98309 (48551 to 164521)    | 3504 (1366 to 7722)    |
| Niue                             | 18 (10 to 28)             | 2 (1 to 4)             | 8 (4 to 15)              | 0.248 (0.112 to 0.464) | 33 (16 to 54)              | 1.108 (0.420 to 2.395) |
| Palau                            | 198 (105 to 315)          | 24 (12 to 44)          | 96 (45 to 172)           | 3 (1 to 6)             | 360 (177 to 591)           | 13 (5 to 28)           |
| Papua New Guinea                 | 27699 (10654 to 54919)    | 3293 (1086 to 7126)    | 7867 (2507 to 18326)     | 269 (81 to 618)        | 29527 (10197 to 60721)     | 1121 (321 to 2747)     |
| Philippines                      | 380214 (176610 to 652374) | 44081 (17501 to 86068) | 132608 (53053 to 272710) | 4232 (1618 to 8704)    | 407623 (171506 to 756769)  | 14123 (4705 to 31513)  |
| Republic of Korea                | 254245 (92637 to 506965)  | 31508 (10311 to 67988) | 138872 (45212 to 311627) | 4236 (1330 to 9301)    | 742598 (255799 to 1503425) | 28448 (8087 to 68224)  |
| Samoa                            | 1583 (841 to 2508)        | 183 (84 to 336)        | 576 (266 to 1039)        | 18 (8 to 35)           | 2089 (1007 to 3505)        | 74 (28 to 162)         |
| Singapore                        | 26051 (12515 to 45522)    | 3258 (1323 to 6389)    | 18338 (7354 to 37428)    | 576 (213 to 1186)      | 80376 (35471 to 146568)    | 3063 (1048 to 7016)    |
| Solomon Islands                  | 2637 (1162 to 4678)       | 319 (127 to 632)       | 768 (290 to 1582)        | 27 (10 to 57)          | 2809 (1119 to 5297)        | 109 (37 to 254)        |
| Tonga                            | 855 (480 to 1310)         | 98 (46 to 176)         | 300 (150 to 529)         | 9 (4 to 18)            | 1198 (599 to 1935)         | 41 (16 to 90)          |
| Tuvalu                           | 76 (37 to 126)            | 9 (4 to 17)            | 29 (12 to 57)            | 0.922 (0.359 to 1.195) | 110 (47 to 197)            | 4 (1 to 9)             |

|          |                                |                             |                               |                          |                                 |                             |
|----------|--------------------------------|-----------------------------|-------------------------------|--------------------------|---------------------------------|-----------------------------|
|          |                                |                             |                               | to<br>1.865)             |                                 |                             |
| Vanuatu  | 1567 (743<br>to 2731)          | 181 (74<br>to 355)          | 455 (190<br>to 916)           | 15 (6 to<br>31)          | 1702 (744<br>to 3073)           | 61 (21 to<br>138)           |
| Viet Nam | 207885<br>(81201 to<br>414700) | 24733<br>(7877 to<br>54494) | 86752<br>(28601 to<br>205074) | 2756<br>(795 to<br>6411) | 323510<br>(112118 to<br>687884) | 11021<br>(3014 to<br>27118) |

Abbreviation: YLDs, years lived with disability.

Values in parentheses represent uncertainty levels derived from the sensitivity analyses.

**eTable 7.** Disease burden of musculoskeletal disorders attributable to high body mass index by sex, age, and World Bank income group, 2019 (number in thousands)

|                   | Low back pain          |                     | Gout                  |                  | Osteoarthritis         |                    |
|-------------------|------------------------|---------------------|-----------------------|------------------|------------------------|--------------------|
|                   | Prevalence             | YLDs                | Prevalence            | YLDs             | Prevalence             | YLDs               |
| Sex               |                        |                     |                       |                  |                        |                    |
| Male              | 15421 (7833 to 25970)  | 1726 (802 to 3113)  | 12849 (5642 to 24597) | 397 (167 to 767) | 29334 (13011 to 52633) | 922 (304 to 2116)  |
| Female            | 20846 (10566 to 35189) | 2556 (1277 to 4446) | 4098 (1769 to 7964)   | 111 (49 to 204)  | 43635 (19313 to 78557) | 1634 (554 to 3797) |
| Age group (years) |                        |                     |                       |                  |                        |                    |
| 0-14              | 1067 (422 to 2242)     | -                   | 0                     | -                | 0                      | -                  |
| 15-49             | 16718 (8070 to 29380)  | 1988 (936 to 3547)  | 4030 (1610 to 8383)   | 138 (59 to 265)  | 10608 (4346 to 20194)  | 395 (137 to 915)   |
| 50-74             | 14679 (7072 to 26440)  | 2004 (1015 to 3491) | 9643 (3987 to 19847)  | 311 (134 to 593) | 48867 (21296 to 88697) | 1854 (682 to 4184) |
| 75-84             | 2855 (1259 to 5450)    | 289 (128 to 520)    | 2427 (950 to 5130)    | 59 (23 to 113)   | 10073 (4520 to 17880)  | 306 (110 to 690)   |
| ≥85               | 947 (423 to 1760)      | -                   | 847 (345 to 1727)     | -                | 3421 (1559 to 6031)    | -                  |
| Income level      |                        |                     |                       |                  |                        |                    |
| High              | 13430 (7267 to 21523)  | 1578 (734 to 2859)  | 7940 (3842 to 13961)  | 226 (106 to 406) | 24057 (11454 to 41340) | 836 (322 to 1856)  |
| Upper-middle      | 13546 (6607 to 23404)  | 1643 (691 to 3196)  | 6205 (2440 to 12854)  | 194 (75 to 396)  | 32741 (13825 to 60466) | 1154 (394 to 2684) |
| Lower-middle      | 8115 (4029 to 13942)   | 932 (385 to 1824)   | 2505 (1059 to 5022)   | 79 (31 to 161)   | 14631 (6449 to 26351)  | 511 (179 to 1156)  |
| Low               | 1177 (534 to 2142)     | 128 (48 to 267)     | 297 (115 to 621)      | 9 (3 to 21)      | 1541 (643 to 2896)     | 55 (18 to 129)     |

Abbreviation: YLDs, years lived with disability.

Values in parentheses represent uncertainty levels derived from the sensitivity analyses.

To estimate morbidity-related costs, YLDs were calculated in people aged 15 to 84 years only. The age categories were determined based on previous studies.<sup>3,33</sup>



**eTable 8.** Health-care, morbidity-related, and total costs of musculoskeletal disorders attributable to high body mass index by location in 2019

| Location                         | Health-care costs                           |            | Morbidity-related costs                    |            | Total                                      |
|----------------------------------|---------------------------------------------|------------|--------------------------------------------|------------|--------------------------------------------|
|                                  | Amount (uncertainty level, US\$, thousands) | % of total | Amount (uncertainty level, US\$, millions) | % of total | Amount (uncertainty level, US\$, millions) |
| Global                           | 60485258 (30683169 to 100000000)            | 33.5       | 120000 (53073 to 233000)                   | 66.5       | 181000 (83757 to 333000)                   |
| Africa                           | 469748 (241799 to 773728)                   | 29.3       | 1132 (476 to 2269)                         | 70.7       | 1602 (718 to 3043)                         |
| Algeria                          | 102601 (52124 to 165617)                    | 30.8       | 231 (101 to 449)                           | 69.2       | 333 (153 to 614)                           |
| Angola                           | 4040 (1653 to 7672)                         | 17.3       | 19 (6 to 42)                               | 82.7       | 23 (8 to 50)                               |
| Benin                            | 1244 (599 to 2160)                          | 14.8       | 7 (3 to 15)                                | 85.2       | 8 (4 to 17)                                |
| Botswana                         | 5664 (3045 to 9145)                         | 40.8       | 8 (4 to 16)                                | 59.2       | 14 (7 to 25)                               |
| Burkina Faso                     | 2365 (973 to 4530)                          | 31.2       | 5 (2 to 12)                                | 68.8       | 8 (3 to 16)                                |
| Burundi                          | 404 (140 to 861)                            | 51.1       | 0.387 (0.105 to 0.928)                     | 48.9       | 0.791 (0.245 to 1.789)                     |
| Cabo Verde                       | 479 (242 to 812)                            | 30.5       | 1.091 (0.460 to 2.193)                     | 69.5       | 2 (1 to 3)                                 |
| Cameroon                         | 5851 (2973 to 9767)                         | 23.0       | 20 (8 to 39)                               | 77.0       | 25 (11 to 49)                              |
| Central African Republic         | 140 (47 to 303)                             | 22.0       | 0.497 (0.136 to 1.184)                     | 78.0       | 0.637 (0.182 to 1.487)                     |
| Chad                             | 579 (222 to 1138)                           | 20.7       | 2 (1 to 5)                                 | 79.3       | 3 (1 to 6)                                 |
| Comoros                          | 167 (73 to 309)                             | 30.2       | 0.386 (0.141 to 0.813)                     | 69.8       | 0.553 (0.215 to 1.122)                     |
| Congo                            | 713 (357 to 1207)                           | 11.3       | 6 (2 to 11)                                | 88.7       | 6 (3 to 13)                                |
| Democratic Republic of the Congo | 2249 (901 to 4444)                          | 20.4       | 9 (3 to 20)                                | 79.6       | 11 (4 to 24)                               |

|                   |                       |      |                        |      |                        |
|-------------------|-----------------------|------|------------------------|------|------------------------|
| Equatorial Guinea | 1131 (598 to 1878)    | 18.5 | 5 (2 to 10)            | 81.5 | 6 (3 to 12)            |
| Eritrea           | 158 (62 to 306)       | 33.3 | 0.317 (0.096 to 0.733) | 66.7 | 0.476 (0.158 to 1.039) |
| Eswatini          | 1454 (764 to 2316)    | 38.1 | 2 (1 to 5)             | 61.9 | 4 (2 to 7)             |
| Ethiopia          | 4130 (1586 to 8281)   | 28.5 | 10 (3 to 23)           | 71.5 | 14 (5 to 32)           |
| Gabon             | 2075 (1047 to 3415)   | 28.3 | 5 (2 to 10)            | 71.7 | 7 (3 to 14)            |
| Gambia            | 299 (140 to 529)      | 31.7 | 0.644 (0.253 to 1.341) | 68.3 | 0.943 (0.393 to 1.869) |
| Ghana             | 10103 (5229 to 16795) | 22.1 | 36 (15 to 72)          | 77.9 | 46 (20 to 88)          |
| Guinea            | 1298 (561 to 2425)    | 21.6 | 5 (2 to 10)            | 78.4 | 6 (2 to 13)            |
| Guinea-Bissau     | 245 (100 to 473)      | 47.5 | 0.271 (0.090 to 0.601) | 52.5 | 0.516 (0.190 to 1.073) |
| Ivory Coast       | 5148 (2402 to 9117)   | 21.4 | 19 (7 to 39)           | 78.6 | 24 (10 to 48)          |
| Kenya             | 13890 (6716 to 24326) | 29.5 | 33 (14 to 67)          | 70.5 | 47 (20 to 91)          |
| Lesotho           | 1489 (761 to 2497)    | 55.0 | 1 (1 to 2)             | 45.0 | 3 (1 to 5)             |
| Liberia           | 1086 (541 to 1836)    | 49.7 | 1.099 (0.468 to 2.200) | 50.3 | 2 (1 to 4)             |
| Madagascar        | 1137 (466 to 2171)    | 38.5 | 2 (1 to 4)             | 61.5 | 3 (1 to 6)             |
| Malawi            | 1505 (616 to 2869)    | 58.5 | 1.070 (0.358 to 2.328) | 41.5 | 3 (1 to 5)             |
| Mali              | 1283 (540 to 2407)    | 20.1 | 5 (2 to 11)            | 79.9 | 6 (2 to 13)            |
| Mauritania        | 1524 (790 to 2536)    | 22.4 | 5 (2 to 11)            | 77.6 | 7 (3 to 13)            |
| Mauritius         | 6655 (3140 to 11422)  | 38.7 | 11 (4 to 21)           | 61.3 | 17 (7 to 33)           |
| Mozambique        | 1880 (787 to 3556)    | 40.4 | 3 (1 to 6)             | 59.6 | 5 (2 to 9)             |
| Namibia           | 3835 (2038 to 6398)   | 41.6 | 5 (2 to 11)            | 58.4 | 9 (4 to 17)            |
| Niger             | 867 (344 to 1710)     | 34.8 | 2 (1 to 4)             | 65.2 | 2 (1 to 5)             |

|                             |                                    |      |                         |      |                            |
|-----------------------------|------------------------------------|------|-------------------------|------|----------------------------|
| Nigeria                     | 47880<br>(22444 to 85155)          | 11.5 | 368 (148 to 751)        | 88.5 | 415 (171 to 836)           |
| Rwanda                      | 1601 (621 to 3140)                 | 50.7 | 1.557 (0.495 to 3.515)  | 49.3 | 3 (1 to 7)                 |
| Sao Tome and Principe       | 77 (38 to 132)                     | 29.5 | 0.184 (0.076 to 0.376)  | 70.5 | 0.262 (0.114 to 0.509)     |
| Senegal                     | 2740 (1287 to 4827)                | 24.7 | 8 (3 to 17)             | 75.3 | 11 (4 to 22)               |
| Seychelles                  | 435 (208 to 748)                   | 24.8 | 1 (1 to 3)              | 75.2 | 2 (1 to 3)                 |
| Sierra Leone                | 1578 (631 to 3060)                 | 55.0 | 1.291 (0.421 to 2.887)  | 45.0 | 3 (1 to 6)                 |
| South Africa                | 209936<br>(115795 to 329451)       | 44.8 | 259 (120 to 498)        | 55.2 | 469 (236 to 828)           |
| South Sudan                 | 739 (339 to 1332)                  | 38.6 | 1.177 (0.453 to 2.444)  | 61.4 | 2 (1 to 4)                 |
| Togo                        | 819 (375 to 1490)                  | 25.5 | 2 (1 to 5)              | 74.5 | 3 (1 to 7)                 |
| Uganda                      | 3703 (1584 to 6937)                | 31.4 | 8 (3 to 17)             | 68.6 | 12 (4 to 24)               |
| United Republic of Tanzania | 5804 (2756 to 10188)               | 35.8 | 10 (4 to 22)            | 64.2 | 16 (7 to 32)               |
| Zambia                      | 3183 (1452 to 5762)                | 35.2 | 6 (2 to 12)             | 64.8 | 9 (4 to 18)                |
| Zimbabwe                    | 3563 (1690 to 6280)                | 50.6 | 3 (1 to 7)              | 49.4 | 7 (3 to 13)                |
| The Americas                | 34375539<br>(18682376 to 54106795) | 34.9 | 64049 (30761 to 117000) | 65.1 | 98425<br>(49443 to 171000) |
| Antigua and Barbuda         | 407 (199 to 687)                   | 21.9 | 1 (1 to 3)              | 78.1 | 2 (1 to 4)                 |
| Argentina                   | 373909<br>(175597 to 651998)       | 47.3 | 417 (170 to 855)        | 52.7 | 791 (345 to 1507)          |
| Bahamas                     | 3717 (1885 to 6084)                | 22.2 | 13 (6 to 26)            | 77.8 | 17 (8 to 32)               |
| Barbados                    | 1703 (843 to 2802)                 | 18.9 | 7 (3 to 15)             | 81.1 | 9 (4 to 17)                |
| Belize                      | 532 (272 to 850)                   | 23.6 | 2 (1 to 3)              | 76.4 | 2 (1 to 4)                 |

|                                        |                                   |      |                           |      |                           |
|----------------------------------------|-----------------------------------|------|---------------------------|------|---------------------------|
| Bolivia<br>(Plurinational<br>State of) | 18804<br>(9396 to<br>30889)       | 36.6 | 33 (14 to 65)             | 63.4 | 51 (23 to<br>96)          |
| Brazil                                 | 1227840<br>(639585 to<br>2012663) | 38.7 | 1948 (858 to<br>3837)     | 61.3 | 3176 (1497<br>to 5849)    |
| Canada                                 | 1071367<br>(524963 to<br>1828023) | 28.2 | 2732 (1217 to<br>5233)    | 71.8 | 3804 (1742<br>to 7061)    |
| Chile                                  | 220423<br>(107011 to<br>373813)   | 36.9 | 376 (159 to<br>754)       | 63.1 | 597 (266 to<br>1128)      |
| Colombia                               | 206873<br>(99891 to<br>348837)    | 43.9 | 265 (109 to<br>536)       | 56.1 | 471 (209 to<br>885)       |
| Costa Rica                             | 31518<br>(15044 to<br>53135)      | 35.5 | 57 (24 to 116)            | 64.5 | 89 (39 to<br>169)         |
| Cuba                                   | 172820<br>(86206 to<br>284847)    | 62.1 | 105 (46 to 210)           | 37.9 | 278 (132 to<br>495)       |
| Dominica                               | 215 (109 to<br>347)               | 29.6 | 0.511 (0.221 to<br>1.011) | 70.4 | 0.725 (0.330<br>to 1.358) |
| Dominican<br>Republic                  | 32256<br>(14998 to<br>55194)      | 33.1 | 65 (27 to 133)            | 66.9 | 97 (42 to<br>188)         |
| Ecuador                                | 61230<br>(33262 to<br>93623)      | 38.3 | 99 (45 to 191)            | 61.7 | 160 (78 to<br>285)        |
| El Salvador                            | 14347<br>(6713 to<br>24270)       | 39.3 | 22 (9 to 45)              | 60.7 | 36 (16 to<br>69)          |
| Grenada                                | 312 (156 to<br>522)               | 21.2 | 1.161 (0.496 to<br>2.330) | 78.8 | 1 (1 to 3)                |
| Guatemala                              | 18381<br>(8180 to<br>33080)       | 34.3 | 35 (13 to 75)             | 65.7 | 54 (21 to<br>108)         |
| Guyana                                 | 1336 (638<br>to 2279)             | 25.8 | 4 (2 to 8)                | 74.2 | 5 (2 to 10)               |
| Haiti                                  | 1127 (420<br>to 2272)             | 24.4 | 3 (1 to 8)                | 75.6 | 5 (1 to 10)               |
| Honduras                               | 7978 (3557<br>to 14073)           | 30.2 | 18 (7 to 39)              | 69.8 | 26 (11 to 53)             |

|                                    |                                 |      |                         |      |                         |
|------------------------------------|---------------------------------|------|-------------------------|------|-------------------------|
| Jamaica                            | 7745 (4028 to 12520)            | 29.9 | 18 (8 to 36)            | 70.1 | 26 (12 to 48)           |
| Mexico                             | 523548 (260295 to 867253)       | 38.7 | 829 (359 to 1642)       | 61.3 | 1353 (619 to 2509)      |
| Nicaragua                          | 7711 (3598 to 13234)            | 44.0 | 10 (4 to 20)            | 56.0 | 18 (8 to 33)            |
| Panama                             | 29495 (14163 to 49760)          | 45.3 | 36 (15 to 72)           | 54.7 | 65 (29 to 122)          |
| Paraguay                           | 18335 (9097 to 30841)           | 39.0 | 29 (12 to 58)           | 61.0 | 47 (21 to 89)           |
| Peru                               | 73256 (34531 to 122849)         | 31.3 | 161 (66 to 328)         | 68.7 | 234 (100 to 451)        |
| Saint Kitts and Nevis              | 349 (175 to 578)                | 24.7 | 1.063 (0.456 to 2.120)  | 75.3 | 1 (1 to 3)              |
| Saint Lucia                        | 547 (269 to 902)                | 24.0 | 2 (1 to 3)              | 76.0 | 2 (1 to 4)              |
| Saint Vincent and the Grenadines   | 267 (129 to 446)                | 28.0 | 0.688 (0.290 to 1.400)  | 72.0 | 0.955 (0.418 to 1.846)  |
| Suriname                           | 2875 (1373 to 4783)             | 48.8 | 3 (1 to 6)              | 51.2 | 6 (3 to 11)             |
| Trinidad and Tobago                | 12996 (6768 to 20821)           | 27.4 | 34 (15 to 68)           | 72.6 | 47 (22 to 89)           |
| United States of America           | 30176215 (16592947 to 47067700) | 34.8 | 56525 (27491 to 102000) | 65.2 | 86702 (44084 to 149000) |
| Uruguay                            | 33712 (15984 to 58222)          | 37.3 | 57 (23 to 115)          | 62.7 | 90 (39 to 173)          |
| Venezuela (Bolivarian Republic of) | 21393 (10093 to 36598)          | 13.4 | 138 (56 to 282)         | 86.6 | 159 (66 to 319)         |
| Eastern Mediterranean              | 1475227 (778959 to 2368993)     | 37.5 | 2454 (1107 to 4671)     | 62.5 | 3930 (1886 to 7040)     |
| Afghanistan                        | 8052 (3820 to 14144)            | 51.5 | 8 (3 to 16)             | 48.5 | 16 (7 to 30)            |

|                            |                              |      |                        |      |                        |
|----------------------------|------------------------------|------|------------------------|------|------------------------|
| Bahrain                    | 14188<br>(7424 to 22499)     | 35.8 | 25 (12 to 48)          | 64.2 | 40 (19 to 71)          |
| Djibouti                   | 94 (39 to 180)               | 10.4 | 0.816 (0.279 to 1.771) | 89.6 | 0.910 (0.318 to 1.951) |
| Egypt                      | 192551<br>(101676 to 303942) | 39.8 | 291 (131 to 554)       | 60.2 | 484 (233 to 858)       |
| Iran (Islamic Republic of) | 293735<br>(153923 to 485077) | 44.6 | 365 (162 to 707)       | 55.4 | 659 (316 to 1192)      |
| Iraq                       | 42128<br>(21115 to 68065)    | 27.9 | 109 (47 to 210)        | 72.1 | 151 (69 to 278)        |
| Jordan                     | 27871<br>(15161 to 43176)    | 39.6 | 43 (20 to 80)          | 60.4 | 70 (35 to 123)         |
| Kuwait                     | 52420<br>(29270 to 79927)    | 34.0 | 102 (48 to 187)        | 66.0 | 154 (77 to 267)        |
| Lebanon                    | 31771<br>(16311 to 50922)    | 44.7 | 39 (17 to 76)          | 55.3 | 71 (34 to 127)         |
| Libya                      | 28425<br>(15034 to 45308)    | 32.0 | 60 (27 to 116)         | 68.0 | 89 (42 to 161)         |
| Morocco                    | 48012<br>(23633 to 80533)    | 25.4 | 141 (60 to 280)        | 74.6 | 189 (84 to 361)        |
| Oman                       | 16014<br>(8420 to 25644)     | 17.4 | 76 (34 to 144)         | 82.6 | 92 (42 to 169)         |
| Pakistan                   | 31688<br>(13433 to 60136)    | 30.3 | 73 (25 to 160)         | 69.7 | 104 (39 to 220)        |
| Qatar                      | 33638<br>(18424 to 51801)    | 33.0 | 68 (32 to 126)         | 67.0 | 102 (51 to 178)        |
| Saudi Arabia               | 418421<br>(226947 to 658117) | 38.1 | 681 (318 to 1265)      | 61.9 | 1099 (545 to 1923)     |
| Sudan                      | 17017<br>(8421 to 28747)     | 47.4 | 19 (8 to 38)           | 52.6 | 36 (16 to 67)          |

|                        |                                   |      |                        |      |                           |
|------------------------|-----------------------------------|------|------------------------|------|---------------------------|
| Syrian Arab Republic   | 47950<br>(23683 to 78980)         | 68.8 | 22 (9 to 43)           | 31.2 | 70 (33 to 122)            |
| Tunisia                | 39047<br>(19433 to 63984)         | 43.4 | 51 (22 to 101)         | 56.6 | 90 (41 to 165)            |
| United Arab Emirates   | 129416<br>(71580 to 202690)       | 32.1 | 273 (129 to 501)       | 67.9 | 403 (201 to 703)          |
| Yemen                  | 2790 (1212 to 5122)               | 26.1 | 8 (3 to 17)            | 73.9 | 11 (4 to 22)              |
| Europe                 | 16315969<br>(8023944 to 27700038) | 32.2 | 34278 (14561 to 68228) | 67.8 | 50594<br>(22585 to 95928) |
| Albania                | 9907 (4835 to 16825)              | 36.0 | 18 (7 to 35)           | 64.0 | 28 (12 to 52)             |
| Andorra                | 1381 (654 to 2403)                | 20.2 | 5 (2 to 11)            | 79.8 | 7 (3 to 13)               |
| Armenia                | 16726<br>(8638 to 27613)          | 52.9 | 15 (7 to 29)           | 47.1 | 32 (15 to 57)             |
| Austria                | 267231<br>(127896 to 469299)      | 34.0 | 518 (211 to 1062)      | 66.0 | 785 (339 to 1531)         |
| Azerbaijan             | 17274<br>(8570 to 29013)          | 31.3 | 38 (16 to 74)          | 68.7 | 55 (25 to 103)            |
| Belarus                | 57289<br>(29451 to 94898)         | 44.5 | 71 (31 to 140)         | 55.5 | 129 (61 to 235)           |
| Belgium                | 317375<br>(152524 to 555013)      | 28.8 | 784 (320 to 1589)      | 71.2 | 1102 (472 to 2144)        |
| Bosnia and Herzegovina | 23610<br>(11832 to 39655)         | 53.3 | 21 (9 to 41)           | 46.7 | 44 (21 to 81)             |
| Bulgaria               | 78794<br>(40209 to 129241)        | 44.8 | 97 (43 to 189)         | 55.2 | 176 (83 to 318)           |
| Croatia                | 53070<br>(27408 to 86166)         | 31.7 | 114 (51 to 221)        | 68.3 | 167 (78 to 307)           |

|            |                              |      |                      |      |                       |
|------------|------------------------------|------|----------------------|------|-----------------------|
| Cyprus     | 8869 (3987 to 16040)         | 25.3 | 26 (10 to 54)        | 74.7 | 35 (14 to 70)         |
| Czechia    | 220108 (113894 to 353663)    | 35.2 | 406 (183 to 778)     | 64.8 | 626 (297 to 1131)     |
| Denmark    | 177858 (85611 to 310644)     | 25.0 | 534 (221 to 1074)    | 75.0 | 712 (307 to 1385)     |
| Estonia    | 21637 (11645 to 34840)       | 30.9 | 48 (22 to 93)        | 69.1 | 70 (33 to 128)        |
| Finland    | 141277 (68443 to 241549)     | 27.1 | 381 (158 to 769)     | 72.9 | 522 (226 to 1010)     |
| France     | 1864938 (914829 to 3180197)  | 32.7 | 3837 (1602 to 7691)  | 67.3 | 5702 (2517 to 10871)  |
| Georgia    | 15711 (7886 to 26955)        | 52.7 | 14 (6 to 28)         | 47.3 | 30 (14 to 55)         |
| Germany    | 3500680 (1751045 to 5868102) | 33.0 | 7112 (3038 to 14100) | 67.0 | 10613 (4789 to 19968) |
| Greece     | 153155 (73067 to 261142)     | 37.5 | 255 (104 to 520)     | 62.5 | 408 (177 to 781)      |
| Hungary    | 147198 (79118 to 234976)     | 35.1 | 273 (124 to 521)     | 64.9 | 420 (203 to 756)      |
| Iceland    | 9020 (4330 to 15536)         | 19.5 | 37 (16 to 74)        | 80.5 | 46 (20 to 90)         |
| Ireland    | 154160 (75885 to 261802)     | 23.9 | 491 (209 to 970)     | 76.1 | 645 (285 to 1232)     |
| Israel     | 107703 (51006 to 187530)     | 18.6 | 471 (193 to 952)     | 81.4 | 578 (244 to 1139)     |
| Italy      | 1234719 (573944 to 2189411)  | 29.9 | 2890 (1153 to 5940)  | 70.1 | 4125 (1727 to 8130)   |
| Kazakhstan | 52510 (27259 to 85689)       | 25.1 | 157 (70 to 303)      | 74.9 | 209 (97 to 388)       |



|                     |                             |      |                     |      |                     |
|---------------------|-----------------------------|------|---------------------|------|---------------------|
| Kyrgyzstan          | 4265 (2043 to 7433)         | 46.0 | 5 (2 to 10)         | 54.0 | 9 (4 to 18)         |
| Latvia              | 24710 (12955 to 40418)      | 33.0 | 50 (23 to 97)       | 67.0 | 75 (36 to 138)      |
| Lithuania           | 43268 (21662 to 71437)      | 38.7 | 69 (30 to 136)      | 61.3 | 112 (51 to 207)     |
| Luxembourg          | 18053 (8769 to 31131)       | 19.2 | 76 (31 to 153)      | 80.8 | 94 (40 to 184)      |
| Malta               | 11117 (5232 to 19543)       | 41.2 | 16 (6 to 32)        | 58.8 | 27 (12 to 52)       |
| Monaco              | 981 (478 to 1654)           | 6.9  | 13 (6 to 26)        | 93.1 | 14 (6 to 28)        |
| Montenegro          | 6404 (3349 to 10288)        | 47.1 | 7 (3 to 14)         | 52.9 | 14 (7 to 24)        |
| Netherlands         | 528673 (245312 to 923365)   | 29.4 | 1269 (507 to 2620)  | 70.6 | 1798 (753 to 3543)  |
| North Macedonia     | 11769 (6015 to 19342)       | 45.8 | 14 (6 to 27)        | 54.2 | 26 (12 to 46)       |
| Norway              | 147834 (68406 to 262604)    | 28.3 | 374 (151 to 769)    | 71.7 | 522 (219 to 1032)   |
| Poland              | 518254 (273644 to 831836)   | 38.2 | 837 (380 to 1601)   | 61.8 | 1356 (654 to 2433)  |
| Portugal            | 196985 (90833 to 350543)    | 34.7 | 371 (150 to 759)    | 65.3 | 568 (241 to 1109)   |
| Republic of Moldova | 12476 (6373 to 20557)       | 28.4 | 31 (14 to 61)       | 71.6 | 44 (20 to 82)       |
| Romania             | 213148 (117969 to 337940)   | 39.6 | 325 (150 to 616)    | 60.4 | 538 (268 to 953)    |
| Russian Federation  | 1235684 (630428 to 2060977) | 35.3 | 2263 (1025 to 4341) | 64.7 | 3499 (1656 to 6402) |
| San Marino          | 868 (425 to 1472)           | 34.3 | 2 (1 to 3)          | 65.7 | 3 (1 to 5)          |

|                |                                       |      |                           |      |                         |
|----------------|---------------------------------------|------|---------------------------|------|-------------------------|
| Serbia         | 66068<br>(33237 to<br>106631)         | 39.2 | 102 (45 to 197)           | 60.8 | 168 (79 to<br>304)      |
| Slovakia       | 71701<br>(37283 to<br>116469)         | 34.6 | 136 (60 to 262)           | 65.4 | 207 (97 to<br>379)      |
| Slovenia       | 44554<br>(23207 to<br>71615)          | 33.6 | 88 (39 to 170)            | 66.4 | 133 (63 to<br>241)      |
| Spain          | 995177<br>(444074 to<br>1835036)      | 34.4 | 1895 (798 to<br>3807)     | 65.6 | 2890 (1242<br>to 5642)  |
| Sweden         | 287676<br>(137106 to<br>494988)       | 30.8 | 645 (270 to<br>1301)      | 69.2 | 933 (407 to<br>1796)    |
| Switzerland    | 355331<br>(166127 to<br>624437)       | 24.0 | 1125 (457 to<br>2291)     | 76.0 | 1481 (623 to<br>2915)   |
| Tajikistan     | 2146 (896<br>to 4144)                 | 47.4 | 2 (1 to 5)                | 52.6 | 5 (2 to 9)              |
| Turkey         | 529015<br>(272079 to<br>839811)       | 43.9 | 676 (299 to<br>1309)      | 56.1 | 1205 (571 to<br>2149)   |
| Turkmenistan   | 16993<br>(8812 to<br>27966)           | 33.5 | 34 (15 to 65)             | 66.5 | 51 (24 to<br>93)        |
| Ukraine        | 237586<br>(125978 to<br>385497)       | 46.6 | 273 (122 to<br>527)       | 53.4 | 510 (248 to<br>912)     |
| United Kingdom | 2056518<br>(1014245<br>to<br>3439575) | 29.4 | 4928 (2149 to<br>9699)    | 70.6 | 6985 (3163<br>to 13139) |
| Uzbekistan     | 26517<br>(13041 to<br>45128)          | 42.9 | 35 (15 to 69)             | 57.1 | 62 (28 to<br>115)       |
| Southeast Asia | 838003<br>(376782 to<br>1510251)      | 27.0 | 2265 (873 to<br>4695)     | 73.0 | 3103 (1249<br>to 6206)  |
| Bangladesh     | 18750<br>(7191 to<br>37516)           | 19.9 | 75 (24 to 168)            | 80.1 | 94 (31 to<br>206)       |
| Bhutan         | 401 (171 to<br>735)                   | 29.0 | 0.982 (0.361 to<br>2.095) | 71.0 | 1 (1 to 3)              |

|                   |                                  |      |                        |      |                        |
|-------------------|----------------------------------|------|------------------------|------|------------------------|
| India             | 438755<br>(197106 to 790424)     | 26.5 | 1215 (463 to 2533)     | 73.5 | 1654 (660 to 3324)     |
| Indonesia         | 165095<br>(77387 to 292346)      | 25.2 | 491 (199 to 983)       | 74.8 | 656 (277 to 1275)      |
| Maldives          | 1405 (606 to 2629)               | 47.0 | 2 (1 to 3)             | 53.0 | 3 (1 to 6)             |
| Myanmar           | 15758<br>(6453 to 30048)         | 39.1 | 25 (8 to 53)           | 60.9 | 40 (15 to 83)          |
| Nepal             | 6822 (2698 to 13265)             | 45.0 | 8 (3 to 18)            | 55.0 | 15 (5 to 32)           |
| Sri Lanka         | 24480<br>(10634 to 43687)        | 39.3 | 38 (14 to 78)          | 60.7 | 62 (25 to 121)         |
| Thailand          | 166402<br>(74496 to 299292)      | 28.9 | 410 (159 to 856)       | 71.1 | 577 (234 to 1155)      |
| Timor-Leste       | 135 (40 to 308)                  | 34.0 | 0.262 (0.064 to 0.641) | 66.0 | 0.396 (0.104 to 0.949) |
| Western Pacific   | 7010773<br>(2579309 to 13993379) | 30.4 | 16055 (5296 to 35929)  | 69.6 | 23065 (7875 to 49923)  |
| Australia         | 886300<br>(460357 to 1440282)    | 26.4 | 2468 (1109 to 4761)    | 73.6 | 3355 (1570 to 6202)    |
| Brunei Darussalam | 1230 (482 to 2397)               | 15.9 | 7 (2 to 14)            | 84.1 | 8 (3 to 17)            |
| Cambodia          | 3262 (1214 to 6694)              | 39.5 | 5 (2 to 11)            | 60.5 | 8 (3 to 18)            |
| China             | 3085173<br>(1096550 to 6261247)  | 29.5 | 7382 (2354 to 16936)   | 70.5 | 10467 (3451 to 23197)  |
| Cook Islands      | 126 (68 to 198)                  | 15.4 | 0.692 (0.315 to 1.313) | 84.6 | 0.818 (0.383 to 1.511) |
| Fiji              | 1777 (915 to 2851)               | 20.0 | 7 (3 to 14)            | 80.0 | 9 (4 to 16)            |
| Japan             | 1980091<br>(603502 to 4254798)   | 34.0 | 3850 (1022 to 9114)    | 66.0 | 5830 (1626 to 13369)   |

|                                  |                            |      |                        |      |                        |
|----------------------------------|----------------------------|------|------------------------|------|------------------------|
| Kiribati                         | 70 (32 to 123)             | 22.8 | 0.238 (0.097 to 0.475) | 77.2 | 0.308 (0.129 to 0.597) |
| Lao People's Democratic Republic | 1537 (643 to 2855)         | 19.1 | 7 (2 to 14)            | 80.9 | 8 (3 to 17)            |
| Malaysia                         | 88582 (44422 to 149520)    | 33.5 | 176 (74 to 348)        | 66.5 | 264 (118 to 498)       |
| Marshall Islands                 | 57 (24 to 104)             | 25.0 | 0.170 (0.066 to 0.349) | 75.0 | 0.227 (0.090 to 0.453) |
| Micronesia (Federated States of) | 42 (21 to 69)              | 9.2  | 0.413 (0.181 to 0.798) | 90.8 | 0.454 (0.202 to 0.868) |
| Mongolia                         | 3826 (1809 to 6762)        | 35.8 | 7 (3 to 14)            | 64.2 | 11 (5 to 21)           |
| Nauru                            | 32 (15 to 54)              | 32.2 | 0.067 (0.029 to 0.130) | 67.8 | 0.099 (0.044 to 0.184) |
| New Zealand                      | 120569 (60995 to 200832)   | 29.9 | 283 (123 to 556)       | 70.1 | 403 (184 to 757)       |
| Niue                             | 8 (4 to 13)                | 20.9 | 0.030 (0.013 to 0.058) | 79.1 | 0.038 (0.017 to 0.070) |
| Palau                            | 187 (95 to 305)            | 31.2 | 0.412 (0.184 to 0.789) | 68.8 | 0.599 (0.279 to 1.093) |
| Papua New Guinea                 | 1135 (414 to 2298)         | 9.3  | 11 (4 to 25)           | 90.7 | 12 (4 to 27)           |
| Philippines                      | 58665 (25937 to 105115)    | 32.7 | 121 (46 to 243)        | 67.3 | 180 (72 to 348)        |
| Republic of Korea                | 637154 (222663 to 1288195) | 31.4 | 1393 (429 to 3152)     | 68.6 | 2030 (651 to 4440)     |
| Samoa                            | 218 (110 to 358)           | 16.4 | 1.111 (0.487 to 2.125) | 83.6 | 1 (1 to 2)             |
| Singapore                        | 89953 (40509 to 162850)    | 25.9 | 258 (97 to 542)        | 74.1 | 348 (138 to 704)       |
| Solomon Islands                  | 118 (50 to 217)            | 12.2 | 0.851 (0.329 to 1.745) | 87.8 | 0.969 (0.378 to 1.962) |
| Tonga                            | 110 (58 to 175)            | 11.4 | 0.855 (0.388 to 1.612) | 88.6 | 0.966 (0.446 to 1.787) |
| Tuvalu                           | 29 (13 to 50)              | 39.9 | 0.043 (0.018 to 0.086) | 60.1 | 0.072 (0.031 to 0.137) |

|          |                         |      |                        |      |                        |
|----------|-------------------------|------|------------------------|------|------------------------|
| Vanuatu  | 56 (26 to 100)          | 6.1  | 0.871 (0.346 to 1.758) | 93.9 | 0.927 (0.372 to 1.858) |
| Viet Nam | 50464 (18382 to 104917) | 39.9 | 76 (23 to 174)         | 60.1 | 127 (41 to 279)        |

Values in parentheses represent uncertainty levels derived from the sensitivity analyses.

Percentage calculation was based on the mean values.

**eTable 9.** Health-care costs of low back pain attributable to high body mass index by location in 2019

| Location                         | Health-care costs per capita, 2019 (\$PPP) | Spending ratio | Health-care costs per case, 2019 (US\$) | Prevalence (uncertainty level)  | Health-care costs (uncertainty level, US\$, thousands) |
|----------------------------------|--------------------------------------------|----------------|-----------------------------------------|---------------------------------|--------------------------------------------------------|
| Global                           | 3073                                       | 0.271          | 602                                     | 36267110 (18437198 to 61011482) | 23113028 (12772057 to 36371680)                        |
| Africa                           | 318                                        | 0.028          | 62                                      | 2759627 (1375035 to 4752062)    | 186351 (100010 to 303177)                              |
| Algeria                          | 765                                        | 0.067          | 150                                     | 285676 (151890 to 457322)       | 42811 (22762 to 68534)                                 |
| Angola                           | 195                                        | 0.017          | 38                                      | 48771 (21260 to 90401)          | 1863 (812 to 3453)                                     |
| Benin                            | 79                                         | 0.007          | 15                                      | 36435 (18325 to 62022)          | 564 (284 to 960)                                       |
| Botswana                         | 1144                                       | 0.101          | 224                                     | 9249 (5394 to 14363)            | 2073 (1209 to 3219)                                    |
| Burkina Faso                     | 119                                        | 0.010          | 23                                      | 44535 (19388 to 84036)          | 1038 (452 to 1959)                                     |
| Burundi                          | 86                                         | 0.008          | 17                                      | 11058 (3935 to 23095)           | 186 (66 to 389)                                        |
| Cabo Verde                       | 380                                        | 0.033          | 74                                      | 2389 (1279 to 3953)             | 178 (95 to 294)                                        |
| Cameroon                         | 121                                        | 0.011          | 24                                      | 113130 (59622 to 187541)        | 2682 (1413 to 4445)                                    |
| Central African Republic         | 61                                         | 0.005          | 12                                      | 5456 (1949 to 11553)            | 65 (23 to 138)                                         |
| Chad                             | 71                                         | 0.006          | 14                                      | 19903 (8112 to 38096)           | 277 (113 to 530)                                       |
| Comoros                          | 187                                        | 0.016          | 37                                      | 1914 (915 to 3382)              | 70 (34 to 124)                                         |
| Congo                            | 93                                         | 0.008          | 18                                      | 16659 (9035 to 27335)           | 303 (165 to 498)                                       |
| Democratic Republic of the Congo | 43                                         | 0.004          | 8                                       | 119975 (49724 to 230839)        | 1011 (419 to 1944)                                     |
| Equatorial Guinea                | 554                                        | 0.049          | 109                                     | 5208 (2884 to 8445)             | 565 (313 to 916)                                       |
| Eritrea                          | 46                                         | 0.004          | 9                                       | 6813 (2901 to 12837)            | 61 (26 to 116)                                         |
| Eswatini                         | 593                                        | 0.052          | 116                                     | 4682 (2551 to 7349)             | 544 (296 to 854)                                       |
| Ethiopia                         | 75                                         | 0.007          | 15                                      | 133552 (54173 to 259601)        | 1962 (796 to 3814)                                     |
| Gabon                            | 541                                        | 0.048          | 106                                     | 8095 (4269 to 13062)            | 858 (452 to 1384)                                      |
| Gambia                           | 118                                        | 0.010          | 23                                      | 5660 (2791 to 9833)             | 131 (65 to 227)                                        |
| Ghana                            | 189                                        | 0.017          | 37                                      | 102261 (56419 to 164425)        | 3786 (2089 to 6088)                                    |
| Guinea                           | 124                                        | 0.011          | 24                                      | 23309 (10838 to 42330)          | 566 (263 to 1028)                                      |
| Guinea-Bissau                    | 178                                        | 0.016          | 35                                      | 3196 (1380 to 6084)             | 111 (48 to 212)                                        |
| Ivory Coast                      | 170                                        | 0.015          | 33                                      | 71045 (35071 to 107019)         | 2366 (1168 to 4097)                                    |

|                                  |      |       |      |                                |                                |
|----------------------------------|------|-------|------|--------------------------------|--------------------------------|
|                                  |      |       |      | 123014)                        |                                |
| Kenya                            | 248  | 0.022 | 49   | 131085 (67420 to 223807)       | 6368 (3275 to 10873)           |
| Lesotho                          | 390  | 0.034 | 76   | 7317 (3920 to 11862)           | 559 (299 to 906)               |
| Liberia                          | 154  | 0.014 | 30   | 15975 (8388 to 26430)          | 482 (253 to 797)               |
| Madagascar                       | 70   | 0.006 | 14   | 35993 (15906 to 65940)         | 494 (218 to 904)               |
| Malawi                           | 107  | 0.009 | 21   | 32689 (14077 to 60688)         | 685 (295 to 1272)              |
| Mali                             | 80   | 0.007 | 16   | 34026 (15244 to 63136)         | 533 (239 to 989)               |
| Mauritania                       | 210  | 0.019 | 41   | 15075 (8171 to 24772)          | 620 (336 to 1019)              |
| Mauritius                        | 1553 | 0.137 | 304  | 7722 (4018 to 12908)           | 2349 (1222 to 3927)            |
| Mozambique                       | 100  | 0.009 | 20   | 46292 (20638 to 84062)         | 907 (404 to 1647)              |
| Namibia                          | 964  | 0.085 | 189  | 7728 (4417 to 12356)           | 1459 (834 to 2333)             |
| Niger                            | 71   | 0.006 | 14   | 28472 (11978 to 54802)         | 396 (167 to 762)               |
| Nigeria                          | 192  | 0.017 | 38   | 630730 (314374 to 1087273)     | 23723 (11824 to 40894)         |
| Rwanda                           | 153  | 0.013 | 30   | 23517 (9601 to 45011)          | 705 (288 to 1349)              |
| Sao Tome and Principe            | 234  | 0.021 | 46   | 657 (336 to 1099)              | 30 (15 to 50)                  |
| Senegal                          | 158  | 0.014 | 31   | 35206 (18004 to 60893)         | 1090 (557 to 1885)             |
| Seychelles                       | 1440 | 0.127 | 282  | 598 (308 to 1009)              | 169 (87 to 285)                |
| Sierra Leone                     | 241  | 0.021 | 47   | 14583 (6174 to 27854)          | 688 (291 to 1315)              |
| South Africa                     | 1202 | 0.106 | 235  | 310618 (179043 to 479891)      | 73139 (42158 to 112997)        |
| South Sudan                      | 83   | 0.007 | 16   | 20595 (9933 to 36251)          | 335 (162 to 589)               |
| Togo                             | 96   | 0.008 | 19   | 18228 (9036 to 32045)          | 343 (170 to 603)               |
| Uganda                           | 131  | 0.012 | 26   | 68074 (30470 to 123762)        | 1747 (782 to 3176)             |
| United Republic of Tanzania      | 103  | 0.009 | 20   | 121912 (62482 to 208169)       | 2460 (1261 to 4200)            |
| Zambia                           | 205  | 0.018 | 40   | 35991 (17353 to 63778)         | 1445 (697 to 2561)             |
| Zimbabwe                         | 211  | 0.019 | 41   | 37572 (19639 to 63344)         | 1553 (812 to 2618)             |
| The Americas                     | 7659 | 0.675 | 1500 | 10187105 (5732953 to 15709360) | 14331710 (8440629 to 21274325) |
| Antigua and Barbuda              | 1281 | 0.113 | 251  | 503 (260 to 830)               | 126 (65 to 208)                |
| Argentina                        | 2285 | 0.201 | 448  | 262329 (126688 to 451237)      | 117423 (56708 to 201981)       |
| Bahamas                          | 2468 | 0.218 | 483  | 2474 (1330 to 3950)            | 1196 (643 to 1910)             |
| Barbados                         | 1020 | 0.090 | 200  | 2376 (1242 to 3857)            | 475 (248 to 771)               |
| Belize                           | 431  | 0.038 | 84   | 2404 (1303 to 3762)            | 203 (110 to 318)               |
| Bolivia (Plurinational State of) | 585  | 0.052 | 115  | 57317 (29490 to 94187)         | 6568 (3379 to 10794)           |

|                                  |       |       |      |                              |                                |
|----------------------------------|-------|-------|------|------------------------------|--------------------------------|
| Brazil                           | 1443  | 0.127 | 283  | 1520278 (816496 to 2456595)  | 429745 (230803 to 694418)      |
| Canada                           | 5837  | 0.514 | 1143 | 391284 (207213 to 632944)    | 447407 (236934 to 723729)      |
| Chile                            | 2472  | 0.218 | 484  | 142440 (71391 to 237419)     | 68976 (34571 to 114970)        |
| Colombia                         | 1214  | 0.107 | 238  | 311577 (156798 to 520706)    | 74098 (37289 to 123832)        |
| Costa Rica                       | 1798  | 0.158 | 352  | 30115 (15053 to 49822)       | 10607 (5302 to 17548)          |
| Cuba                             | 2863  | 0.252 | 561  | 91468 (48985 to 145803)      | 51299 (27473 to 81773)         |
| Dominica                         | 676   | 0.060 | 132  | 498 (266 to 793)             | 66 (35 to 105)                 |
| Dominican Republic               | 1124  | 0.099 | 220  | 49943 (24641 to 84538)       | 10997 (5426 to 18614)          |
| Ecuador                          | 963   | 0.085 | 189  | 100824 (58008 to 151615)     | 19020 (10943 to 28602)         |
| El Salvador                      | 707   | 0.062 | 138  | 37121 (18393 to 61714)       | 5141 (2547 to 8547)            |
| Grenada                          | 863   | 0.076 | 169  | 606 (321 to 994)             | 102 (54 to 168)                |
| Guatemala                        | 601   | 0.053 | 118  | 65306 (30099 to 117189)      | 7689 (3544 to 13797)           |
| Guyana                           | 648   | 0.057 | 127  | 3748 (1897 to 6286)          | 476 (241 to 798)               |
| Haiti                            | 111   | 0.010 | 22   | 21035 (8248 to 41345)        | 457 (179 to 899)               |
| Honduras                         | 429   | 0.038 | 84   | 38506 (17742 to 67247)       | 3236 (1491 to 5651)            |
| Jamaica                          | 715   | 0.063 | 140  | 18673 (10173 to 29589)       | 2615 (1425 to 4144)            |
| Mexico                           | 1171  | 0.103 | 229  | 806363 (416624 to 1313358)   | 184973 (95570 to 301274)       |
| Nicaragua                        | 501   | 0.044 | 98   | 31043 (14981 to 52750)       | 3047 (1470 to 5177)            |
| Panama                           | 2353  | 0.207 | 461  | 21388 (10729 to 35559)       | 9859 (4946 to 16390)           |
| Paraguay                         | 968   | 0.085 | 190  | 37334 (19362 to 62046)       | 7080 (3672 to 11766)           |
| Peru                             | 683   | 0.060 | 134  | 176617 (85854 to 293398)     | 23631 (11487 to 39255)         |
| Saint Kitts and Nevis            | 1415  | 0.125 | 277  | 393 (207 to 642)             | 109 (57 to 178)                |
| Saint Lucia                      | 744   | 0.066 | 146  | 1201 (626 to 1952)           | 175 (91 to 285)                |
| Saint Vincent and the Grenadines | 626   | 0.055 | 123  | 677 (343 to 1113)            | 83 (42 to 137)                 |
| Suriname                         | 1420  | 0.125 | 278  | 3316 (1682 to 5443)          | 922 (468 to 1514)              |
| Trinidad and Tobago              | 1836  | 0.162 | 360  | 10855 (5963 to 17025)        | 3904 (2145 to 6123)            |
| United States of America         | 11345 | 1.000 | 2222 | 5769970 (3443558 to 8463897) | 12823282 (7653024 to 18810311) |
| Uruguay                          | 2156  | 0.190 | 422  | 23172 (11469 to 39315)       | 9786 (4844 to 16604)           |



|                                    |      |       |     |                              |                            |
|------------------------------------|------|-------|-----|------------------------------|----------------------------|
| Venezuela (Bolivarian Republic of) | 230  | 0.020 | 45  | 153952 (75517 to 260440)     | 6936 (3402 to 11734)       |
| Eastern Mediterranean              | 832  | 0.073 | 163 | 3560620 (1863280 to 5842942) | 706804 (385241 to 1121446) |
| Afghanistan                        | 223  | 0.020 | 44  | 91949 (44696 to 161118)      | 4017 (1953 to 7038)        |
| Bahrain                            | 2260 | 0.199 | 443 | 14222 (7646 to 22510)        | 6296 (3385 to 9966)        |
| Djibouti                           | 88   | 0.008 | 17  | 2266 (1004 to 4215)          | 39 (17 to 73)              |
| Egypt                              | 617  | 0.054 | 121 | 733212 (396707 to 1150359)   | 88621 (47949 to 139040)    |
| Iran (Islamic Republic of)         | 1112 | 0.098 | 218 | 632255 (348083 to 1024329)   | 137727 (75824 to 223134)   |
| Iraq                               | 415  | 0.037 | 81  | 244185 (127664 to 390261)    | 19851 (10379 to 31727)     |
| Jordan                             | 734  | 0.065 | 144 | 90692 (50870 to 139286)      | 13040 (7314 to 20027)      |
| Kuwait                             | 2724 | 0.240 | 534 | 47722 (27284 to 72461)       | 25465 (14559 to 38666)     |
| Lebanon                            | 1663 | 0.147 | 326 | 36669 (19504 to 58741)       | 11946 (6354 to 19136)      |
| Libya                              | 1155 | 0.102 | 226 | 54889 (29553 to 87265)       | 12419 (6687 to 19744)      |
| Morocco                            | 429  | 0.038 | 84  | 243729 (124207 to 406199)    | 20483 (10438 to 34136)     |
| Oman                               | 1272 | 0.112 | 249 | 35941 (18959 to 57728)       | 8956 (4724 to 14384)       |
| Pakistan                           | 158  | 0.014 | 31  | 438392 (191479 to 825070)    | 13569 (5927 to 25537)      |
| Qatar                              | 3017 | 0.266 | 591 | 32486 (18187 to 49740)       | 19200 (10749 to 29397)     |
| Saudi Arabia                       | 3223 | 0.284 | 631 | 336912 (186462 to 521652)    | 212715 (117726 to 329354)  |
| Sudan                              | 252  | 0.022 | 49  | 169081 (86870 to 284040)     | 8347 (4288 to 14022)       |
| Syrian Arab Republic               | 1046 | 0.092 | 205 | 93323 (47415 to 154936)      | 19122 (9716 to 31747)      |
| Tunisia                            | 884  | 0.078 | 173 | 86344 (44218 to 142032)      | 14952 (7657 to 24596)      |
| United Arab Emirates               | 3203 | 0.282 | 627 | 109433 (62110 to 170933)     | 68663 (38971 to 107252)    |
| Yemen                              | 105  | 0.009 | 21  | 66918 (30362 to 120066)      | 1376 (625 to 2470)         |
| Europe                             | 3443 | 0.303 | 674 | 9300538 (4900638 to          | 5786444 (2990868 to        |

|                        |      |       |      |                            |                             |
|------------------------|------|-------|------|----------------------------|-----------------------------|
|                        |      |       |      | 15251798)                  | 9624969)                    |
| Albania                | 816  | 0.072 | 160  | 26407 (12977 to 45618)     | 4221 (2074 to 7292)         |
| Andorra                | 3141 | 0.277 | 615  | 816 (411 to 1369)          | 502 (253 to 842)            |
| Armenia                | 1387 | 0.122 | 272  | 26580 (14287 to 42959)     | 7222 (3882 to 11672)        |
| Austria                | 6132 | 0.541 | 1201 | 67836 (34252 to 116615)    | 81486 (41145 to 140081)     |
| Azerbaijan             | 550  | 0.048 | 108  | 75586 (38133 to 124274)    | 8144 (4108 to 13390)        |
| Belarus                | 1163 | 0.103 | 228  | 95322 (51496 to 155727)    | 21717 (11732 to 35479)      |
| Belgium                | 5698 | 0.502 | 1116 | 96614 (49230 to 164797)    | 107841 (54951 to 183947)    |
| Bosnia and Herzegovina | 1416 | 0.125 | 277  | 33223 (16940 to 56027)     | 9216 (4699 to 15541)        |
| Bulgaria               | 1896 | 0.167 | 371  | 82408 (43028 to 135414)    | 30608 (15981 to 50295)      |
| Croatia                | 2020 | 0.178 | 396  | 52741 (28282 to 86576)     | 20870 (11191 to 34258)      |
| Cyprus                 | 1881 | 0.166 | 368  | 9185 (4383 to 16379)       | 3384 (1615 to 6035)         |
| Czechia                | 3296 | 0.291 | 646  | 133518 (69846 to 217396)   | 86208 (45097 to 140365)     |
| Denmark                | 6112 | 0.539 | 1197 | 58431 (29638 to 99832)     | 69960 (35486 to 119529)     |
| Estonia                | 2623 | 0.231 | 514  | 15375 (8753 to 24224)      | 7900 (4498 to 12447)        |
| Finland                | 4680 | 0.413 | 917  | 47064 (24067 to 78909)     | 43147 (22064 to 72342)      |
| France                 | 5605 | 0.494 | 1098 | 575659 (300937 to 956819)  | 632066 (330424 to 1050573)  |
| Georgia                | 1133 | 0.100 | 222  | 27213 (14479 to 45551)     | 6040 (3214 to 10110)        |
| Germany                | 6482 | 0.571 | 1270 | 948506 (489442 to 1580790) | 1204399 (621486 to 2007263) |
| Greece                 | 2551 | 0.225 | 500  | 95371 (47244 to 164086)    | 47659 (23609 to 81998)      |
| Hungary                | 2321 | 0.205 | 455  | 130491 (73149 to 206859)   | 59331 (33259 to 94052)      |
| Iceland                | 5227 | 0.461 | 1024 | 3372 (1746 to 5581)        | 3452 (1788 to 5715)         |
| Ireland                | 6362 | 0.561 | 1246 | 49265 (25120 to 82601)     | 61398 (31306 to 102944)     |
| Israel                 | 3056 | 0.269 | 599  | 70215 (34508 to 119585)    | 42034 (20658 to 71590)      |
| Italy                  | 3916 | 0.345 | 767  | 512845 (241981 to 909900)  | 393414 (185629 to 698003)   |
| Kazakhstan             | 855  | 0.075 | 167  | 142810 (77266 to           | 23919 (12941 to             |

|                     |      |       |      |                             |                           |
|---------------------|------|-------|------|-----------------------------|---------------------------|
|                     |      |       |      | 226533)                     | 37942)                    |
| Kyrgyzstan          | 350  | 0.031 | 69   | 30430 (15149 to 52143)      | 2086 (1039 to 3575)       |
| Latvia              | 2008 | 0.177 | 393  | 23065 (12888 to 36736)      | 9073 (5069 to 14450)      |
| Lithuania           | 2562 | 0.226 | 502  | 30947 (16009 to 51244)      | 15532 (8035 to 25718)     |
| Luxembourg          | 6436 | 0.567 | 1261 | 5156 (2621 to 8851)         | 6500 (3305 to 11159)      |
| Malta               | 4803 | 0.423 | 941  | 4266 (2076 to 7418)         | 4014 (1953 to 6979)       |
| Monaco              | 3479 | 0.307 | 682  | 460 (233 to 775)            | 313 (159 to 528)          |
| Montenegro          | 1840 | 0.162 | 360  | 7540 (4055 to 12174)        | 2718 (1461 to 4388)       |
| Netherlands         | 6217 | 0.548 | 1218 | 134076 (64136 to 232387)    | 163288 (78110 to 283018)  |
| North Macedonia     | 1137 | 0.100 | 223  | 21849 (11317 to 35976)      | 4867 (2521 to 8013)       |
| Norway              | 7013 | 0.618 | 1374 | 36828 (18055 to 63866)      | 50595 (24804 to 87740)    |
| Poland              | 2256 | 0.199 | 442  | 475528 (256587 to 768822)   | 210153 (113395 to 339771) |
| Portugal            | 3350 | 0.295 | 656  | 106018 (50928 to 184884)    | 69574 (33421 to 121329)   |
| Republic of Moldova | 667  | 0.059 | 131  | 36719 (19417 to 59303)      | 4798 (2537 to 7749)       |
| Romania             | 1819 | 0.160 | 356  | 244640 (143898 to 384876)   | 87173 (51275 to 137143)   |
| Russian Federation  | 1546 | 0.136 | 303  | 1713553 (953477 to 2718512) | 518953 (288763 to 823307) |
| San Marino          | 4612 | 0.407 | 903  | 335 (171 to 558)            | 303 (154 to 504)          |
| Serbia              | 1302 | 0.115 | 255  | 104108 (53589 to 168696)    | 26553 (13668 to 43026)    |
| Slovakia            | 2373 | 0.209 | 465  | 61789 (32623 to 101050)     | 28723 (15165 to 46974)    |
| Slovenia            | 3456 | 0.305 | 677  | 25251 (13476 to 40720)      | 17095 (9124 to 27568)     |
| Spain               | 3985 | 0.351 | 781  | 360956 (185577 to 606277)   | 281776 (144868 to 473283) |
| Sweden              | 6149 | 0.542 | 1205 | 86434 (43704 to 145525)     | 104114 (52643 to 175292)  |
| Switzerland         | 8521 | 0.751 | 1669 | 78780 (38484 to 137132)     | 131500 (64237 to 228902)  |
| Tajikistan          | 251  | 0.022 | 49   | 22426 (9791 to 42474)       | 1103 (481 to 2088)        |
| Turkey              | 1316 | 0.116 | 258  | 834448 (443730 to 1311407)  | 215118 (114392 to 338076) |
| Turkmenistan        | 1247 | 0.110 | 244  | 33653 (17855 to 54782)      | 8221 (4362 to 13382)      |
| Ukraine             | 957  | 0.084 | 187  | 508052 (284467 to 808395)   | 95245 (53329 to 151550)   |

|                                  |      |       |      |                               |                             |
|----------------------------------|------|-------|------|-------------------------------|-----------------------------|
| United Kingdom                   | 4960 | 0.437 | 972  | 758847 (383385 to 1258988)    | 737322 (372510 to 1223276)  |
| Uzbekistan                       | 391  | 0.034 | 77   | 177530 (91344 to 293409)      | 13598 (6996 to 22474)       |
| Southeast Asia                   | 311  | 0.027 | 61   | 4736245 (2336292 to 8245158)  | 292618 (145155 to 506720)   |
| Bangladesh                       | 129  | 0.011 | 25   | 300385 (124528 to 577032)     | 7591 (3147 to 14582)        |
| Bhutan                           | 315  | 0.028 | 62   | 2669 (1196 to 4840)           | 165 (74 to 299)             |
| India                            | 253  | 0.022 | 50   | 2700625 (1350094 to 4666679)  | 133846 (66912 to 231286)    |
| Indonesia                        | 373  | 0.033 | 73   | 1059023 (544679 to 1804483)   | 77381 (39799 to 131851)     |
| Maldives                         | 2145 | 0.189 | 420  | 1561 (714 to 2846)            | 656 (300 to 1196)           |
| Myanmar                          | 233  | 0.021 | 46   | 140088 (62012 to 255328)      | 6394 (2830 to 11654)        |
| Nepal                            | 188  | 0.017 | 37   | 81679 (35161 to 154871)       | 3008 (1295 to 5704)         |
| Sri Lanka                        | 555  | 0.049 | 109  | 80396 (38874 to 134033)       | 8741 (4226 to 14572)        |
| Thailand                         | 759  | 0.067 | 149  | 368384 (178576 to 641880)     | 54773 (26551 to 95437)      |
| Timor-Leste                      | 226  | 0.020 | 44   | 1434 (459 to 3167)            | 63 (20 to 140)              |
| Western Pacific                  | 1670 | 0.147 | 327  | 5722976 (2229000 to 11210162) | 1809101 (710155 to 3541044) |
| Australia                        | 5398 | 0.476 | 1057 | 272644 (149934 to 429138)     | 288304 (158546 to 453786)   |
| Brunei Darussalam                | 1454 | 0.128 | 285  | 1614 (647 to 3111)            | 460 (184 to 886)            |
| Cambodia                         | 233  | 0.021 | 46   | 32993 (13084 to 65565)        | 1506 (597 to 2993)          |
| China                            | 893  | 0.079 | 175  | 3684595 (1376321 to 7358638)  | 644558 (240764 to 1287271)  |
| Cook Islands                     | 1056 | 0.093 | 207  | 223 (125 to 343)              | 46 (26 to 71)               |
| Fiji                             | 498  | 0.044 | 98   | 7376 (4051 to 11464)          | 720 (395 to 1118)           |
| Japan                            | 4787 | 0.422 | 938  | 578771 (180581 to 1255913)    | 542740 (169339 to 1177725)  |
| Kiribati                         | 259  | 0.023 | 51   | 663 (318 to 1116)             | 34 (16 to 57)               |
| Lao People's Democratic Republic | 202  | 0.018 | 40   | 18189 (8068 to 32264)         | 720 (319 to 1277)           |
| Malaysia                         | 1200 | 0.106 | 235  | 160351 (86289 to 262295)      | 37694 (20284 to 61658)      |
| Marshall Islands                 | 499  | 0.044 | 98   | 268 (119 to 475)              | 26 (12 to 46)               |

|                                  |      |       |     |                           |                          |
|----------------------------------|------|-------|-----|---------------------------|--------------------------|
| Micronesia (Federated States of) | 131  | 0.012 | 26  | 729 (385 to 1175)         | 19 (10 to 30)            |
| Mongolia                         | 623  | 0.055 | 122 | 15863 (7831 to 27586)     | 1936 (956 to 3367)       |
| Nauru                            | 1387 | 0.122 | 272 | 60 (30 to 99)             | 16 (8 to 27)             |
| New Zealand                      | 4434 | 0.391 | 869 | 45608 (24221 to 74804)    | 39615 (21038 to 64975)   |
| Niue                             | 849  | 0.075 | 166 | 18 (10 to 28)             | 3 (2 to 5)               |
| Palau                            | 1817 | 0.160 | 356 | 198 (105 to 315)          | 70 (37 to 112)           |
| Papua New Guinea                 | 106  | 0.009 | 21  | 27699 (10654 to 54919)    | 575 (221 to 1140)        |
| Philippines                      | 396  | 0.035 | 78  | 380214 (176610 to 652374) | 29495 (13700 to 50607)   |
| Republic of Korea                | 3529 | 0.311 | 691 | 254245 (92637 to 506965)  | 175762 (64041 to 350470) |
| Samoa                            | 319  | 0.028 | 62  | 1583 (841 to 2508)        | 99 (53 to 157)           |
| Singapore                        | 4645 | 0.409 | 910 | 26051 (12515 to 45522)    | 23705 (11388 to 41421)   |
| Solomon Islands                  | 116  | 0.010 | 23  | 2637 (1162 to 4678)       | 60 (26 to 106)           |
| Tonga                            | 290  | 0.026 | 57  | 855 (480 to 1310)         | 49 (27 to 74)            |
| Tuvalu                           | 835  | 0.074 | 164 | 76 (37 to 126)            | 12 (6 to 21)             |
| Vanuatu                          | 92   | 0.008 | 18  | 1567 (743 to 2731)        | 28 (13 to 49)            |
| Viet Nam                         | 512  | 0.045 | 100 | 207885 (81201 to 414700)  | 20850 (8144 to 41594)    |

Abbreviation: \$PPP, 2020 purchasing-power parity-adjusted US\$.

Values in parentheses represent uncertainty levels derived from the sensitivity analyses.

**eTable 10.** Health-care costs of gout attributable to high body mass index by location in 2019

| Location                         | Health-care costs per capita, 2019 (\$PPP) | Spending ratio | Health-care costs per case, 2019 (US\$) | Prevalence (uncertainty level) | Health-care costs (uncertainty level, US\$, thousands) |
|----------------------------------|--------------------------------------------|----------------|-----------------------------------------|--------------------------------|--------------------------------------------------------|
| Global                           | 3073                                       | 0.271          | 103                                     | 16947252 (7454900 to 32457792) | 2483397 (1225572 to 4288596)                           |
| Africa                           | 318                                        | 0.028          | 11                                      | 758571 (329691 to 1485300)     | 10509 (5008 to 19214)                                  |
| Algeria                          | 765                                        | 0.067          | 26                                      | 82950 (40110 to 150719)        | 2133 (1031 to 3875)                                    |
| Angola                           | 195                                        | 0.017          | 7                                       | 12555 (4528 to 26958)          | 82 (30 to 177)                                         |
| Benin                            | 79                                         | 0.007          | 3                                       | 8758 (3934 to 16633)           | 23 (10 to 44)                                          |
| Botswana                         | 1144                                       | 0.101          | 38                                      | 3367 (1600 to 6249)            | 129 (62 to 240)                                        |
| Burkina Faso                     | 119                                        | 0.010          | 4                                       | 9313 (3365 to 20329)           | 37 (13 to 81)                                          |
| Burundi                          | 86                                         | 0.008          | 3                                       | 2925 (836 to 7306)             | 8 (2 to 21)                                            |
| Cabo Verde                       | 380                                        | 0.033          | 13                                      | 770 (360 to 1446)              | 10 (5 to 18)                                           |
| Cameroon                         | 121                                        | 0.011          | 4                                       | 27598 (12841 to 51004)         | 112 (52 to 207)                                        |
| Central African Republic         | 61                                         | 0.005          | 2                                       | 1308 (375 to 3272)             | 3 (1 to 7)                                             |
| Chad                             | 71                                         | 0.006          | 2                                       | 4283 (1396 to 9971)            | 10 (3 to 24)                                           |
| Comoros                          | 187                                        | 0.016          | 6                                       | 576 (226 to 1197)              | 4 (1 to 8)                                             |
| Congo                            | 93                                         | 0.008          | 3                                       | 5055 (2258 to 9646)            | 16 (7 to 30)                                           |
| Democratic Republic of the Congo | 43                                         | 0.004          | 1                                       | 36104 (12918 to 78970)         | 52 (19 to 114)                                         |
| Equatorial Guinea                | 554                                        | 0.049          | 19                                      | 1245 (603 to 2203)             | 23 (11 to 41)                                          |
| Eritrea                          | 46                                         | 0.004          | 2                                       | 2184 (782 to 4828)             | 3 (1 to 7)                                             |
| Eswatini                         | 593                                        | 0.052          | 20                                      | 1685 (847 to 2951)             | 34 (17 to 59)                                          |
| Ethiopia                         | 75                                         | 0.007          | 3                                       | 38867 (12745 to 88280)         | 98 (32 to 223)                                         |

|                       |      |       |    |                          |                   |
|-----------------------|------|-------|----|--------------------------|-------------------|
| Gabon                 | 541  | 0.048 | 18 | 2441 (1130 to 4500)      | 44 (21 to 82)     |
| Gambia                | 118  | 0.010 | 4  | 1519 (644 to 2972)       | 6 (3 to 12)       |
| Ghana                 | 189  | 0.017 | 6  | 31554 (14956 to 58008)   | 200 (95 to 368)   |
| Guinea                | 124  | 0.011 | 4  | 5548 (2042 to 12047)     | 23 (9 to 50)      |
| Guinea-Bissau         | 178  | 0.016 | 6  | 714 (258 to 1563)        | 4 (2 to 9)        |
| Ivory Coast           | 170  | 0.015 | 6  | 18291 (7422 to 36733)    | 104 (42 to 210)   |
| Kenya                 | 248  | 0.022 | 8  | 39482 (17606 to 76540)   | 329 (147 to 638)  |
| Lesotho               | 390  | 0.034 | 13 | 2279 (1078 to 4261)      | 30 (14 to 56)     |
| Liberia               | 154  | 0.014 | 5  | 4244 (1923 to 7988)      | 22 (10 to 41)     |
| Madagascar            | 70   | 0.006 | 2  | 10320 (3758 to 22605)    | 24 (9 to 53)      |
| Malawi                | 107  | 0.009 | 4  | 8629 (3209 to 18102)     | 31 (12 to 65)     |
| Mali                  | 80   | 0.007 | 3  | 9239 (3448 to 19605)     | 25 (9 to 53)      |
| Mauritania            | 210  | 0.019 | 7  | 4491 (2116 to 8326)      | 32 (15 to 59)     |
| Mauritius             | 1553 | 0.137 | 52 | 4066 (1736 to 7773)      | 212 (91 to 406)   |
| Mozambique            | 100  | 0.009 | 3  | 10793 (3981 to 23335)    | 36 (13 to 78)     |
| Namibia               | 964  | 0.085 | 32 | 2666 (1280 to 4897)      | 86 (41 to 159)    |
| Niger                 | 71   | 0.006 | 2  | 6152 (2110 to 14239)     | 15 (5 to 34)      |
| Nigeria               | 192  | 0.017 | 6  | 127274 (55380 to 249798) | 821 (357 to 1612) |
| Rwanda                | 153  | 0.013 | 5  | 5504 (1879 to 12372)     | 28 (10 to 64)     |
| Sao Tome and Principe | 234  | 0.021 | 8  | 211 (95 to 402)          | 2 (1 to 3)        |
| Senegal               | 158  | 0.014 | 5  | 10065 (4193 to 20271)    | 53 (22 to 108)    |
| Seychelles            | 1440 | 0.127 | 48 | 284 (124 to 543)         | 14 (6 to 26)      |
| Sierra Leone          | 241  | 0.021 | 8  | 3535 (1189 to 7940)      | 29 (10 to 64)     |

|                                  |      |       |     |                              |                             |
|----------------------------------|------|-------|-----|------------------------------|-----------------------------|
| South Africa                     | 1202 | 0.106 | 40  | 128802 (64882 to 224391)     | 5203 (2621 to 9064)         |
| South Sudan                      | 83   | 0.007 | 3   | 5464 (2230 to 11037)         | 15 (6 to 31)                |
| Togo                             | 96   | 0.008 | 3   | 4385 (1764 to 8992)          | 14 (6 to 29)                |
| Uganda                           | 131  | 0.012 | 4   | 16354 (6163 to 34339)        | 72 (27 to 151)              |
| United Republic of Tanzania      | 103  | 0.009 | 3   | 36105 (15629 to 72083)       | 125 (54 to 250)             |
| Zambia                           | 205  | 0.018 | 7   | 9949 (4086 to 19882)         | 69 (28 to 137)              |
| Zimbabwe                         | 211  | 0.019 | 7   | 8667 (3657 to 17790)         | 61 (26 to 126)              |
| The Americas                     | 7659 | 0.675 | 257 | 5628341 (2897828 to 9321606) | 1793366 (939344 to 2912800) |
| Antigua and Barbuda              | 1281 | 0.113 | 43  | 96 (44 to 175)               | 4 (2 to 8)                  |
| Argentina                        | 2285 | 0.201 | 77  | 177989 (77740 to 335389)     | 13668 (5970 to 25754)       |
| Bahamas                          | 2468 | 0.218 | 83  | 449 (224 to 804)             | 37 (19 to 67)               |
| Barbados                         | 1020 | 0.090 | 34  | 471 (231 to 845)             | 16 (8 to 29)                |
| Belize                           | 431  | 0.038 | 14  | 382 (189 to 675)             | 6 (3 to 10)                 |
| Bolivia (Plurinational State of) | 585  | 0.052 | 20  | 10619 (4981 to 19298)        | 209 (98 to 379)             |
| Brazil                           | 1443 | 0.127 | 48  | 261936 (130106 to 462127)    | 12702 (6309 to 22410)       |
| Canada                           | 5837 | 0.514 | 196 | 399558 (184057 to 733296)    | 78376 (36104 to 143841)     |
| Chile                            | 2472 | 0.218 | 83  | 94656 (42533 to 174790)      | 7863 (3533 to 14520)        |
| Colombia                         | 1214 | 0.107 | 41  | 33368 (15753 to 60810)       | 1361 (643 to 2481)          |
| Costa Rica                       | 1798 | 0.158 | 60  | 3763 (1795 to 6808)          | 227 (108 to 411)            |
| Cuba                             | 2863 | 0.252 | 96  | 16981 (8288 to 30387)        | 1634 (797 to 2924)          |
| Dominica                         | 676  | 0.060 | 23  | 92 (45 to 165)               | 2 (1 to 4)                  |
| Dominican Republic               | 1124 | 0.099 | 38  | 9166 (4230 to 16946)         | 346 (160 to 640)            |
| Ecuador                          | 963  | 0.085 | 32  | 24883 (12775 to 42883)       | 805 (413 to 1388)           |



|                                    |       |       |     |                              |                             |
|------------------------------------|-------|-------|-----|------------------------------|-----------------------------|
| El Salvador                        | 707   | 0.062 | 24  | 3922 (1871 to 7076)          | 93 (44 to 168)              |
| Grenada                            | 863   | 0.076 | 29  | 103 (49 to 190)              | 3 (1 to 6)                  |
| Guatemala                          | 601   | 0.053 | 20  | 6081 (2516 to 12016)         | 123 (51 to 243)             |
| Guyana                             | 648   | 0.057 | 22  | 587 (271 to 1087)            | 13 (6 to 24)                |
| Haiti                              | 111   | 0.010 | 4   | 3033 (1073 to 6760)          | 11 (4 to 25)                |
| Honduras                           | 429   | 0.038 | 14  | 3722 (1597 to 7201)          | 54 (23 to 104)              |
| Jamaica                            | 715   | 0.063 | 24  | 3185 (1611 to 5637)          | 77 (39 to 135)              |
| Mexico                             | 1171  | 0.103 | 39  | 107705 (52610 to 191065)     | 4238 (2070 to 7519)         |
| Nicaragua                          | 501   | 0.044 | 17  | 3195 (1455 to 5945)          | 54 (24 to 100)              |
| Panama                             | 2353  | 0.207 | 79  | 2717 (1273 to 5054)          | 215 (101 to 400)            |
| Paraguay                           | 968   | 0.085 | 33  | 5656 (2653 to 10424)         | 184 (86 to 339)             |
| Peru                               | 683   | 0.060 | 23  | 37532 (17207 to 68692)       | 861 (395 to 1577)           |
| Saint Kitts and Nevis              | 1415  | 0.125 | 48  | 76 (37 to 135)               | 4 (2 to 6)                  |
| Saint Lucia                        | 744   | 0.066 | 25  | 211 (101 to 381)             | 5 (3 to 10)                 |
| Saint Vincent and the Grenadines   | 626   | 0.055 | 21  | 128 (59 to 238)              | 3 (1 to 5)                  |
| Suriname                           | 1420  | 0.125 | 48  | 600 (285 to 1104)            | 29 (14 to 53)               |
| Trinidad and Tobago                | 1836  | 0.162 | 62  | 2079 (1046 to 3665)          | 128 (65 to 226)             |
| United States of America           | 11345 | 1.000 | 381 | 4376671 (2312452 to 7040919) | 1668639 (881640 to 2684403) |
| Uruguay                            | 2156  | 0.190 | 72  | 16871 (7401 to 31863)        | 1222 (536 to 2309)          |
| Venezuela (Bolivarian Republic of) | 230   | 0.020 | 8   | 19858 (9268 to 36757)        | 153 (72 to 284)             |
| Eastern Mediterranean              | 832   | 0.073 | 28  | 926358 (431363 to 1694518)   | 32130 (15603 to 56576)      |
| Afghanistan                        | 223   | 0.020 | 7   | 19898 (8602 to 38936)        | 149 (64 to 292)             |
| Bahrain                            | 2260  | 0.199 | 76  | 4765 (2293 to 8306)          | 362 (174 to 631)            |

|                            |      |       |     |                              |                           |
|----------------------------|------|-------|-----|------------------------------|---------------------------|
| Djibouti                   | 88   | 0.008 | 3   | 807 (286 to 1730)            | 2 (1 to 5)                |
| Egypt                      | 617  | 0.054 | 21  | 182500 (88608 to 322139)     | 3784 (1837 to 6679)       |
| Iran (Islamic Republic of) | 1112 | 0.098 | 37  | 160062 (75038 to 290751)     | 5981 (2804 to 10865)      |
| Iraq                       | 415  | 0.037 | 14  | 62227 (29766 to 110485)      | 868 (415 to 1541)         |
| Jordan                     | 734  | 0.065 | 25  | 23074 (11697 to 38596)       | 569 (289 to 952)          |
| Kuwait                     | 2724 | 0.240 | 92  | 12604 (6459 to 21108)        | 1154 (591 to 1932)        |
| Lebanon                    | 1663 | 0.147 | 56  | 12596 (6259 to 22215)        | 704 (350 to 1241)         |
| Libya                      | 1155 | 0.102 | 39  | 15446 (7638 to 26678)        | 600 (296 to 1035)         |
| Morocco                    | 429  | 0.038 | 14  | 64073 (29951 to 119413)      | 924 (432 to 1722)         |
| Oman                       | 1272 | 0.112 | 43  | 8689 (4269 to 15038)         | 371 (182 to 643)          |
| Pakistan                   | 158  | 0.014 | 5   | 122099 (47568 to 254741)     | 648 (253 to 1353)         |
| Qatar                      | 3017 | 0.266 | 101 | 8625 (4235 to 14425)         | 874 (429 to 1462)         |
| Saudi Arabia               | 3223 | 0.284 | 108 | 87163 (43954 to 149223)      | 9441 (4761 to 16163)      |
| Sudan                      | 252  | 0.022 | 8   | 39502 (17567 to 73760)       | 335 (149 to 625)          |
| Syrian Arab Republic       | 1046 | 0.092 | 35  | 27273 (12656 to 50313)       | 959 (445 to 1769)         |
| Tunisia                    | 884  | 0.078 | 30  | 26927 (12570 to 49146)       | 800 (373 to 1460)         |
| United Arab Emirates       | 3203 | 0.282 | 108 | 32997 (16130 to 56646)       | 3552 (1736 to 6097)       |
| Yemen                      | 105  | 0.009 | 4   | 15030 (5818 to 30868)        | 53 (21 to 109)            |
| Europe                     | 3443 | 0.303 | 116 | 3077117 (1405687 to 5731746) | 383483 (169681 to 727365) |
| Albania                    | 816  | 0.072 | 27  | 4927 (2269 to 9286)          | 135 (62 to 255)           |
| Andorra                    | 3141 | 0.277 | 106 | 367 (158 to 698)             | 39 (17 to 74)             |
| Armenia                    | 1387 | 0.122 | 47  | 7284 (3585 to 12991)         | 339 (167 to 606)          |
| Austria                    | 6132 | 0.541 | 206 | 36031 (15443 to 70337)       | 7425 (3182 to 14494)      |

|                        |      |       |     |                           |                         |
|------------------------|------|-------|-----|---------------------------|-------------------------|
| Azerbaijan             | 550  | 0.048 | 18  | 18403 (8674 to 33880)     | 340 (160 to 626)        |
| Belarus                | 1163 | 0.103 | 39  | 25293 (12584 to 45573)    | 989 (492 to 1781)       |
| Belgium                | 5698 | 0.502 | 191 | 43424 (18401 to 85261)    | 8315 (3524 to 16326)    |
| Bosnia and Herzegovina | 1416 | 0.125 | 48  | 6990 (3281 to 12984)      | 333 (156 to 618)        |
| Bulgaria               | 1896 | 0.167 | 64  | 17865 (8513 to 32754)     | 1138 (542 to 2087)      |
| Croatia                | 2020 | 0.178 | 68  | 11226 (5416 to 20239)     | 762 (368 to 1374)       |
| Cyprus                 | 1881 | 0.166 | 63  | 3601 (1463 to 7293)       | 228 (92 to 461)         |
| Czechia                | 3296 | 0.291 | 111 | 28703 (14294 to 50338)    | 3179 (1583 to 5576)     |
| Denmark                | 6112 | 0.539 | 205 | 21661 (9037 to 42528)     | 4449 (1856 to 8735)     |
| Estonia                | 2623 | 0.231 | 88  | 4633 (2393 to 8222)       | 408 (211 to 725)        |
| Finland                | 4680 | 0.413 | 157 | 23920 (10351 to 46809)    | 3762 (1628 to 7362)     |
| France                 | 5605 | 0.494 | 188 | 247495 (104995 to 484687) | 46618 (19777 to 91296)  |
| Georgia                | 1133 | 0.100 | 38  | 9180 (4304 to 16891)      | 350 (164 to 643)        |
| Germany                | 6482 | 0.571 | 218 | 409168 (177230 to 778329) | 89130 (38606 to 169545) |
| Greece                 | 2551 | 0.225 | 86  | 49340 (20797 to 94899)    | 4230 (1783 to 8135)     |
| Hungary                | 2321 | 0.205 | 78  | 26438 (13365 to 46588)    | 2062 (1042 to 3634)     |
| Iceland                | 5227 | 0.461 | 176 | 1370 (608 to 2597)        | 241 (107 to 456)        |
| Ireland                | 6362 | 0.561 | 214 | 17690 (7795 to 33705)     | 3782 (1667 to 7206)     |
| Israel                 | 3056 | 0.269 | 103 | 25176 (10909 to 48218)    | 2586 (1120 to 4952)     |
| Italy                  | 3916 | 0.345 | 132 | 223152 (93731 to 439277)  | 29367 (12335 to 57809)  |
| Kazakhstan             | 855  | 0.075 | 29  | 36378 (17898 to 64412)    | 1045 (514 to 1851)      |
| Kyrgyzstan             | 350  | 0.031 | 12  | 7068 (3192 to 13406)      | 83 (38 to 158)          |

|                     |      |       |     |                           |                        |
|---------------------|------|-------|-----|---------------------------|------------------------|
| Latvia              | 2008 | 0.177 | 67  | 6529 (3216 to 11585)      | 441 (217 to 782)       |
| Lithuania           | 2562 | 0.226 | 86  | 8809 (4235 to 16066)      | 758 (365 to 1383)      |
| Luxembourg          | 6436 | 0.567 | 216 | 2258 (987 to 4375)        | 488 (214 to 946)       |
| Malta               | 4803 | 0.423 | 161 | 1742 (707 to 3488)        | 281 (114 to 563)       |
| Monaco              | 3479 | 0.307 | 117 | 220 (100 to 414)          | 26 (12 to 48)          |
| Montenegro          | 1840 | 0.162 | 62  | 1428 (697 to 2530)        | 88 (43 to 156)         |
| Netherlands         | 6217 | 0.548 | 209 | 67225 (27424 to 135185)   | 14045 (5730 to 28244)  |
| North Macedonia     | 1137 | 0.100 | 38  | 4528 (2193 to 8339)       | 173 (84 to 319)        |
| Norway              | 7013 | 0.618 | 236 | 15609 (6386 to 31103)     | 3679 (1505 to 7330)    |
| Poland              | 2256 | 0.199 | 76  | 99947 (49731 to 177335)   | 7577 (3770 to 13445)   |
| Portugal            | 3350 | 0.295 | 113 | 43734 (17875 to 87242)    | 4923 (2012 to 9822)    |
| Republic of Moldova | 667  | 0.059 | 22  | 9544 (4635 to 17471)      | 214 (104 to 392)       |
| Romania             | 1819 | 0.160 | 61  | 50337 (25851 to 88618)    | 3077 (1580 to 5417)    |
| Russian Federation  | 1546 | 0.136 | 52  | 426926 (212011 to 759289) | 22181 (11015 to 39448) |
| San Marino          | 4612 | 0.407 | 155 | 146 (64 to 275)           | 23 (10 to 43)          |
| Serbia              | 1302 | 0.115 | 44  | 21706 (10308 to 39566)    | 950 (451 to 1731)      |
| Slovakia            | 2373 | 0.209 | 80  | 12587 (6199 to 22770)     | 1004 (494 to 1816)     |
| Slovenia            | 3456 | 0.305 | 116 | 5816 (2866 to 10262)      | 675 (333 to 1192)      |
| Spain               | 3985 | 0.351 | 134 | 210709 (92977 to 396450)  | 28218 (12451 to 53092) |
| Sweden              | 6149 | 0.542 | 207 | 38299 (16870 to 74026)    | 7914 (3486 to 15297)   |
| Switzerland         | 8521 | 0.751 | 286 | 31294 (12633 to 62056)    | 8961 (3618 to 17770)   |
| Tajikistan          | 251  | 0.022 | 8   | 4909 (1791 to 10687)      | 41 (15 to 90)          |
| Turkey              | 1316 | 0.116 | 44  | 223524 (110106 to 387268) | 9885 (4869 to 17127)   |
| Turkmenistan        | 1247 | 0.110 | 42  | 8302 (4053 to 14814)      | 348 (170 to 621)       |

|                   |      |       |     |                               |                          |
|-------------------|------|-------|-----|-------------------------------|--------------------------|
| Ukraine           | 957  | 0.084 | 32  | 124081 (61204 to 222142)      | 3991 (1968 to 7144)      |
| United Kingdom    | 4960 | 0.437 | 167 | 309918 (141692 to 572290)     | 51659 (23618 to 95392)   |
| Uzbekistan        | 391  | 0.034 | 13  | 40211 (18190 to 73900)        | 528 (239 to 971)         |
| Southeast Asia    | 311  | 0.027 | 10  | 1820023 (741420 to 3736221)   | 20569 (8413 to 42068)    |
| Bangladesh        | 129  | 0.011 | 4   | 81424 (27858 to 185193)       | 353 (121 to 803)         |
| Bhutan            | 315  | 0.028 | 11  | 620 (238 to 1290)             | 7 (3 to 14)              |
| India             | 253  | 0.022 | 9   | 1034895 (429656 to 2110525)   | 8799 (3653 to 17944)     |
| Indonesia         | 373  | 0.033 | 13  | 386035 (158052 to 779003)     | 4839 (1981 to 9765)      |
| Maldives          | 2145 | 0.189 | 72  | 719 (270 to 1474)             | 52 (19 to 106)           |
| Myanmar           | 233  | 0.021 | 8   | 52811 (18961 to 114900)       | 414 (148 to 900)         |
| Nepal             | 188  | 0.017 | 6   | 17244 (6148 to 37924)         | 109 (39 to 240)          |
| Sri Lanka         | 555  | 0.049 | 19  | 40013 (15462 to 84945)        | 746 (288 to 1584)        |
| Thailand          | 759  | 0.067 | 26  | 205725 (84636 to 419573)      | 5247 (2159 to 10702)     |
| Timor-Leste       | 226  | 0.020 | 8   | 536 (139 to 1394)             | 4 (1 to 11)              |
| Western Pacific   | 1670 | 0.147 | 56  | 4736841 (1648912 to 10488401) | 243339 (87522 to 530573) |
| Australia         | 5398 | 0.476 | 181 | 257382 (124285 to 468179)     | 46690 (22546 to 84930)   |
| Brunei Darussalam | 1454 | 0.128 | 49  | 692 (240 to 1485)             | 34 (12 to 73)            |
| Cambodia          | 233  | 0.021 | 8   | 11184 (3695 to 25981)         | 88 (29 to 203)           |
| China             | 893  | 0.079 | 30  | 3598725 (1223341 to 8050029)  | 107998 (36712 to 241581) |
| Cook Islands      | 1056 | 0.093 | 35  | 109 (55 to 187)               | 4 (2 to 7)               |
| Fiji              | 498  | 0.044 | 17  | 3137 (1513 to 5530)           | 52 (25 to 93)            |
| Japan             | 4787 | 0.422 | 161 | 346571 (97348 to 843427)      | 55753 (15660 to 135683)  |
| Kiribati          | 259  | 0.023 | 9   | 199 (84 to 390)               | 2 (1 to 3)               |

|                                  |      |       |     |                          |                        |
|----------------------------------|------|-------|-----|--------------------------|------------------------|
| Lao People's Democratic Republic | 202  | 0.018 | 7   | 6927 (2580 to 14482)     | 47 (18 to 98)          |
| Malaysia                         | 1200 | 0.106 | 40  | 74462 (33395 to 140768)  | 3003 (1347 to 5677)    |
| Marshall Islands                 | 499  | 0.044 | 17  | 93 (37 to 191)           | 2 (1 to 3)             |
| Micronesia (Federated States of) | 131  | 0.012 | 4   | 243 (114 to 456)         | 1 (1 to 2)             |
| Mongolia                         | 623  | 0.055 | 21  | 3802 (1659 to 7205)      | 80 (35 to 151)         |
| Nauru                            | 1387 | 0.122 | 47  | 17 (8 to 33)             | 0.812 (0.369 to 1.516) |
| New Zealand                      | 4434 | 0.391 | 149 | 46629 (22874 to 80584)   | 6948 (3408 to 12008)   |
| Niue                             | 849  | 0.075 | 29  | 8 (4 to 15)              | 0.239 (0.116 to 0.431) |
| Palau                            | 1817 | 0.160 | 61  | 96 (45 to 172)           | 6 (3 to 10)            |
| Papua New Guinea                 | 106  | 0.009 | 4   | 7867 (2507 to 18326)     | 28 (9 to 65)           |
| Philippines                      | 396  | 0.035 | 13  | 132608 (53053 to 272710) | 1765 (706 to 3629)     |
| Republic of Korea                | 3529 | 0.311 | 119 | 138872 (45212 to 311627) | 16469 (5362 to 36957)  |
| Samoa                            | 319  | 0.028 | 11  | 576 (266 to 1039)        | 6 (3 to 11)            |
| Singapore                        | 4645 | 0.409 | 156 | 18338 (7354 to 37428)    | 2863 (1148 to 5842)    |
| Solomon Islands                  | 116  | 0.010 | 4   | 768 (290 to 1582)        | 3 (1 to 6)             |
| Tonga                            | 290  | 0.026 | 10  | 300 (150 to 529)         | 3 (1 to 5)             |
| Tuvalu                           | 835  | 0.074 | 28  | 29 (12 to 57)            | 0.814 (0.346 to 1.588) |
| Vanuatu                          | 92   | 0.008 | 3   | 455 (190 to 916)         | 1 (1 to 3)             |
| Viet Nam                         | 512  | 0.045 | 17  | 86752 (28601 to 205074)  | 1493 (492 to 3529)     |

Abbreviation: \$PPP, 2020 purchasing-power parity-adjusted US\$.

Values in parentheses represent uncertainty levels derived from the sensitivity analyses.

**eTable 11.** Health-care costs of osteoarthritis attributable to high body mass index by location in 2019

| Location                         | Health-care costs per capita, 2019 (\$PPP) | Spending ratio | Health-care costs per case, 2019 (US\$) | Prevalence (uncertainty level)   | Health-care costs (uncertainty level, US\$, thousands) |
|----------------------------------|--------------------------------------------|----------------|-----------------------------------------|----------------------------------|--------------------------------------------------------|
| Global                           | 3073                                       | 0.271          | 522                                     | 72969260 (32371084 to 131052677) | 34888834 (16685541 to 59792908)                        |
| Africa                           | 318                                        | 0.028          | 54                                      | 3964819 (1814204 to 7032158)     | 272887 (136781 to 451337)                              |
| Algeria                          | 765                                        | 0.067          | 130                                     | 443930 (218134 to 717656)        | 57657 (28331 to 93209)                                 |
| Angola                           | 195                                        | 0.017          | 33                                      | 63278 (24502 to 122093)          | 2095 (811 to 4042)                                     |
| Benin                            | 79                                         | 0.007          | 13                                      | 48948 (22767 to 86221)           | 657 (305 to 1156)                                      |
| Botswana                         | 1144                                       | 0.101          | 194                                     | 17822 (9137 to 29276)            | 3461 (1775 to 5686)                                    |
| Burkina Faso                     | 119                                        | 0.010          | 20                                      | 63811 (25138 to 123214)          | 1289 (508 to 2489)                                     |
| Burundi                          | 86                                         | 0.008          | 15                                      | 14323 (4883 to 30864)            | 209 (71 to 451)                                        |
| Cabo Verde                       | 380                                        | 0.033          | 65                                      | 4521 (2198 to 7743)              | 292 (142 to 500)                                       |
| Cameroon                         | 121                                        | 0.011          | 21                                      | 148843 (73404 to 248944)         | 3058 (1508 to 5114)                                    |
| Central African Republic         | 61                                         | 0.005          | 10                                      | 6991 (2199 to 15258)             | 72 (23 to 158)                                         |
| Chad                             | 71                                         | 0.006          | 12                                      | 24180 (8797 to 48457)            | 291 (106 to 584)                                       |
| Comoros                          | 187                                        | 0.016          | 32                                      | 2944 (1207 to 5590)              | 93 (38 to 177)                                         |
| Congo                            | 93                                         | 0.008          | 16                                      | 24918 (11709 to 43018)           | 393 (185 to 679)                                       |
| Democratic Republic of the Congo | 43                                         | 0.004          | 7                                       | 162531 (63546 to 326723)         | 1187 (464 to 2385)                                     |
| Equatorial Guinea                | 554                                        | 0.049          | 94                                      | 5765 (2916 to 9782)              | 542 (274 to 920)                                       |

|               |      |       |     |                            |                        |
|---------------|------|-------|-----|----------------------------|------------------------|
| Eritrea       | 46   | 0.004 | 8   | 11955 (4411 to 23361)      | 93 (34 to 182)         |
| Eswatini      | 593  | 0.052 | 101 | 8708 (4480 to 13944)       | 877 (451 to 1404)      |
| Ethiopia      | 75   | 0.007 | 13  | 162527 (59512 to 333345)   | 2070 (758 to 4245)     |
| Gabon         | 541  | 0.048 | 92  | 12772 (6252 to 21215)      | 1173 (574 to 1949)     |
| Gambia        | 118  | 0.010 | 20  | 8098 (3641 to 14465)       | 162 (73 to 290)        |
| Ghana         | 189  | 0.017 | 32  | 190601 (94902 to 322196)   | 6116 (3045 to 10339)   |
| Guinea        | 124  | 0.011 | 21  | 33685 (13743 to 63940)     | 709 (289 to 1346)      |
| Guinea-Bissau | 178  | 0.016 | 30  | 4285 (1667 to 8306)        | 129 (50 to 251)        |
| Ivory Coast   | 170  | 0.015 | 29  | 92763 (41276 to 166678)    | 2677 (1191 to 4811)    |
| Kenya         | 248  | 0.022 | 42  | 170821 (78224 to 304356)   | 7192 (3294 to 12815)   |
| Lesotho       | 390  | 0.034 | 66  | 13601 (6754 to 23181)      | 901 (447 to 1535)      |
| Liberia       | 154  | 0.014 | 26  | 22275 (10649 to 38134)     | 582 (278 to 997)       |
| Madagascar    | 70   | 0.006 | 12  | 52061 (20113 to 102112)    | 619 (239 to 1214)      |
| Malawi        | 107  | 0.009 | 18  | 43439 (17058 to 84309)     | 789 (310 to 1532)      |
| Mali          | 80   | 0.007 | 14  | 53348 (21510 to 100459)    | 725 (292 to 1364)      |
| Mauritania    | 210  | 0.019 | 36  | 24468 (12318 to 40905)     | 872 (439 to 1458)      |
| Mauritius     | 1553 | 0.137 | 264 | 15527 (6929 to 26890)      | 4094 (1827 to 7090)    |
| Mozambique    | 100  | 0.009 | 17  | 55184 (21752 to 107812)    | 937 (369 to 1830)      |
| Namibia       | 964  | 0.085 | 164 | 13988 (7100 to 23863)      | 2289 (1162 to 3906)    |
| Niger         | 71   | 0.006 | 12  | 37893 (14328 to 75804)     | 457 (173 to 914)       |
| Nigeria       | 192  | 0.017 | 33  | 715885 (314830 to 1308373) | 23336 (10263 to 42649) |
| Rwanda        | 153  | 0.013 | 26  | 33406 (12445 to 66513)     | 868 (323 to 1728)      |



|                                  |      |       |      |                                |                                |
|----------------------------------|------|-------|------|--------------------------------|--------------------------------|
| Sao Tome and Principe            | 234  | 0.021 | 40   | 1143 (550 to 1981)             | 45 (22 to 79)                  |
| Senegal                          | 158  | 0.014 | 27   | 59527 (26370 to 105690)        | 1597 (707 to 2835)             |
| Seychelles                       | 1440 | 0.127 | 244  | 1034 (470 to 1789)             | 253 (115 to 437)               |
| Sierra Leone                     | 241  | 0.021 | 41   | 21045 (8069 to 41078)          | 861 (330 to 1681)              |
| South Africa                     | 1202 | 0.106 | 204  | 644839 (347993 to 1016254)     | 131594 (71016 to 207389)       |
| South Sudan                      | 83   | 0.007 | 14   | 27600 (12146 to 50506)         | 389 (171 to 712)               |
| Togo                             | 96   | 0.008 | 16   | 28377 (12217 to 52658)         | 463 (199 to 858)               |
| Uganda                           | 131  | 0.012 | 22   | 84728 (34822 to 162317)        | 1884 (774 to 3610)             |
| United Republic of Tanzania      | 103  | 0.009 | 17   | 184086 (82431 to 328140)       | 3219 (1441 to 5738)            |
| Zambia                           | 205  | 0.018 | 35   | 47954 (20900 to 88044)         | 1669 (727 to 3064)             |
| Zimbabwe                         | 211  | 0.019 | 36   | 54391 (23806 to 98702)         | 1948 (853 to 3536)             |
| The Americas                     | 7659 | 0.675 | 1300 | 17395805 (8698214 to 28824471) | 18250463 (9302403 to 29919670) |
| Antigua and Barbuda              | 1281 | 0.113 | 217  | 1273 (607 to 2168)             | 277 (132 to 471)               |
| Argentina                        | 2285 | 0.201 | 388  | 625917 (291074 to 1093626)     | 242819 (112919 to 424262)      |
| Bahamas                          | 2468 | 0.218 | 419  | 5926 (2919 to 9802)            | 2483 (1223 to 4107)            |
| Barbados                         | 1020 | 0.090 | 173  | 7000 (3388 to 11560)           | 1212 (587 to 2002)             |
| Belize                           | 431  | 0.038 | 73   | 4419 (2173 to 7147)            | 323 (159 to 523)               |
| Bolivia (Plurinational State of) | 585  | 0.052 | 99   | 121092 (59593 to 198515)       | 12027 (5919 to 19716)          |
| Brazil                           | 1443 | 0.127 | 245  | 3205837 (1642826 to 5289373)   | 785393 (402473 to 1295835)     |
| Canada                           | 5837 | 0.514 | 991  | 550545 (254215 to 969187)      | 545584 (251925 to 960453)      |

|                                  |      |       |     |                             |                           |
|----------------------------------|------|-------|-----|-----------------------------|---------------------------|
| Chile                            | 2472 | 0.218 | 420 | 342119 (164185 to 582151)   | 143583 (68907 to 244322)  |
| Colombia                         | 1214 | 0.107 | 206 | 637591 (300616 to 1079644)  | 131413 (61960 to 222525)  |
| Costa Rica                       | 1798 | 0.158 | 305 | 67756 (31557 to 115232)     | 20683 (9633 to 35176)     |
| Cuba                             | 2863 | 0.252 | 486 | 246645 (119192 to 411772)   | 119887 (57936 to 200151)  |
| Dominica                         | 676  | 0.060 | 115 | 1277 (633 to 2077)          | 147 (73 to 238)           |
| Dominican Republic               | 1124 | 0.099 | 191 | 109592 (49325 to 188335)    | 20913 (9413 to 35940)     |
| Ecuador                          | 963  | 0.085 | 163 | 253249 (133982 to 389205)   | 41405 (21905 to 63633)    |
| El Salvador                      | 707  | 0.062 | 120 | 75919 (34335 to 129583)     | 9113 (4121 to 15554)      |
| Grenada                          | 863  | 0.076 | 147 | 1411 (685 to 2378)          | 207 (100 to 348)          |
| Guatemala                        | 601  | 0.053 | 102 | 103589 (44937 to 186608)    | 10570 (4585 to 19041)     |
| Guyana                           | 648  | 0.057 | 110 | 7705 (3561 to 13248)        | 848 (392 to 1457)         |
| Haiti                            | 111  | 0.010 | 19  | 34940 (12578 to 71493)      | 658 (237 to 1347)         |
| Honduras                         | 429  | 0.038 | 73  | 64369 (28054 to 114204)     | 4688 (2043 to 8318)       |
| Jamaica                          | 715  | 0.063 | 121 | 41629 (21121 to 67883)      | 5053 (2564 to 8240)       |
| Mexico                           | 1171 | 0.103 | 199 | 1681697 (818145 to 2809029) | 334337 (162655 to 558460) |
| Nicaragua                        | 501  | 0.044 | 85  | 54211 (24729 to 93545)      | 4611 (2103 to 7957)       |
| Panama                           | 2353 | 0.207 | 399 | 48615 (22822 to 82531)      | 19421 (9117 to 32970)     |
| Paraguay                         | 968  | 0.085 | 164 | 67365 (32489 to 114007)     | 11071 (5339 to 18736)     |
| Peru                             | 683  | 0.060 | 116 | 420532 (195319 to 707296)   | 48764 (22649 to 82017)    |
| Saint Kitts and Nevis            | 1415 | 0.125 | 240 | 985 (483 to 1637)           | 237 (116 to 393)          |
| Saint Lucia                      | 744  | 0.066 | 126 | 2903 (1386 to 4811)         | 367 (175 to 608)          |
| Saint Vincent and the Grenadines | 626  | 0.055 | 106 | 1708 (802 to 2869)          | 182 (85 to 305)           |

|                                    |       |       |      |                               |                                |
|------------------------------------|-------|-------|------|-------------------------------|--------------------------------|
| Suriname                           | 1420  | 0.125 | 241  | 7981 (3698 to 13342)          | 1924 (892 to 3217)             |
| Trinidad and Tobago                | 1836  | 0.162 | 312  | 28755 (14625 to 46427)        | 8963 (4559 to 14472)           |
| United States of America           | 11345 | 1.000 | 1926 | 8142942 (4183684 to 13276933) | 15684295 (8058284 to 25572985) |
| Uruguay                            | 2156  | 0.190 | 366  | 62023 (28970 to 107391)       | 22703 (10604 to 39309)         |
| Venezuela (Bolivarian Republic of) | 230   | 0.020 | 39   | 366290 (169507 to 629464)     | 14303 (6619 to 24580)          |
| Eastern Mediterranean              | 832   | 0.073 | 141  | 4618052 (2266815 to 7707889)  | 736293 (378115 to 1190971)     |
| Afghanistan                        | 223   | 0.020 | 38   | 102633 (47629 to 179971)      | 3886 (1803 to 6814)            |
| Bahrain                            | 2260  | 0.199 | 384  | 19623 (10073 to 31019)        | 7529 (3865 to 11902)           |
| Djibouti                           | 88    | 0.008 | 15   | 3538 (1413 to 6838)           | 53 (21 to 102)                 |
| Egypt                              | 617   | 0.054 | 105  | 956026 (495363 to 1510445)    | 100146 (51890 to 158223)       |
| Iran (Islamic Republic of)         | 1112  | 0.098 | 189  | 794664 (398822 to 1329914)    | 150026 (75294 to 251077)       |
| Iraq                               | 415   | 0.037 | 70   | 303851 (146488 to 493879)     | 21409 (10321 to 34797)         |
| Jordan                             | 734   | 0.065 | 125  | 114445 (60647 to 178119)      | 14262 (7558 to 22197)          |
| Kuwait                             | 2724  | 0.240 | 462  | 55789 (30529 to 85040)        | 25801 (14119 to 39329)         |
| Lebanon                            | 1663  | 0.147 | 282  | 67725 (34029 to 108183)       | 19121 (9608 to 30544)          |
| Libya                              | 1155  | 0.102 | 196  | 78567 (41058 to 125083)       | 15406 (8051 to 24528)          |
| Morocco                            | 429   | 0.038 | 73   | 365284 (175239 to 613377)     | 26605 (12763 to 44675)         |
| Oman                               | 1272  | 0.112 | 216  | 30966 (16271 to 49159)        | 6687 (3514 to 10616)           |
| Pakistan                           | 158   | 0.014 | 27   | 651312 (270421 to 1239388)    | 17471 (7254 to 33246)          |
| Qatar                              | 3017  | 0.266 | 512  | 26481 (14145 to 40885)        | 13564 (7245 to 20942)          |

|                        |      |       |      |                                |                                |
|------------------------|------|-------|------|--------------------------------|--------------------------------|
| Saudi Arabia           | 3223 | 0.284 | 547  | 358678 (190902 to 571282)      | 196266 (104460 to 312600)      |
| Sudan                  | 252  | 0.022 | 43   | 194836 (93113 to 329586)       | 8336 (3984 to 14101)           |
| Syrian Arab Republic   | 1046 | 0.092 | 178  | 156930 (76143 to 256009)       | 27869 (13522 to 45464)         |
| Tunisia                | 884  | 0.078 | 150  | 155210 (75974 to 252717)       | 23294 (11402 to 37929)         |
| United Arab Emirates   | 3203 | 0.282 | 544  | 105188 (56774 to 164291)       | 57201 (30873 to 89341)         |
| Yemen                  | 105  | 0.009 | 18   | 76307 (31784 to 142701)        | 1360 (567 to 2544)             |
| Europe                 | 3443 | 0.303 | 585  | 17248229 (8339493 to 29272616) | 10146041 (4863395 to 17347704) |
| Albania                | 816  | 0.072 | 139  | 40066 (19475 to 66975)         | 5551 (2698 to 9279)            |
| Andorra                | 3141 | 0.277 | 533  | 1575 (720 to 2788)             | 840 (384 to 1487)              |
| Armenia                | 1387 | 0.122 | 235  | 38918 (19489 to 65123)         | 9164 (4589 to 15335)           |
| Austria                | 6132 | 0.541 | 1041 | 171285 (80272 to 302307)       | 178320 (83569 to 314724)       |
| Azerbaijan             | 550  | 0.048 | 93   | 94139 (46068 to 160613)        | 8790 (4302 to 14998)           |
| Belarus                | 1163 | 0.103 | 197  | 175154 (87246 to 291913)       | 34584 (17227 to 57638)         |
| Belgium                | 5698 | 0.502 | 967  | 208002 (97220 to 366698)       | 201219 (94050 to 354740)       |
| Bosnia and Herzegovina | 1416 | 0.125 | 240  | 58493 (29023 to 97733)         | 14062 (6977 to 23495)          |
| Bulgaria               | 1896 | 0.167 | 322  | 146158 (73580 to 238769)       | 47048 (23685 to 76859)         |
| Croatia                | 2020 | 0.178 | 343  | 91670 (46213 to 147351)        | 31438 (15849 to 50534)         |
| Cyprus                 | 1881 | 0.166 | 319  | 16462 (7137 to 29885)          | 5257 (2279 to 9544)            |
| Czechia                | 3296 | 0.291 | 560  | 233603 (120114 to 371208)      | 130721 (67214 to 207722)       |
| Denmark                | 6112 | 0.539 | 1038 | 99693 (46516 to 175757)        | 103449 (48269 to 182379)       |
| Estonia                | 2623 | 0.231 | 445  | 29930 (15576 to 48657)         | 13328 (6937 to 21668)          |

|                 |      |       |      |                             |                              |
|-----------------|------|-------|------|-----------------------------|------------------------------|
| Finland         | 4680 | 0.413 | 795  | 118767 (56321 to 203692)    | 94367 (44750 to 161845)      |
| France          | 5605 | 0.494 | 952  | 1246588 (593345 to 2141999) | 1186254 (564627 to 2038328)  |
| Georgia         | 1133 | 0.100 | 192  | 48457 (23439 to 84226)      | 9321 (4509 to 16201)         |
| Germany         | 6482 | 0.571 | 1100 | 2005598 (991329 to 3354211) | 2207151 (1090953 to 3691293) |
| Greece          | 2551 | 0.225 | 433  | 233815 (110079 to 394846)   | 101266 (47675 to 171008)     |
| Hungary         | 2321 | 0.205 | 394  | 217750 (113733 to 348403)   | 85805 (44817 to 137289)      |
| Iceland         | 5227 | 0.461 | 887  | 6003 (2744 to 10553)        | 5327 (2435 to 9365)          |
| Ireland         | 6362 | 0.561 | 1080 | 82380 (39729 to 140403)     | 88980 (42913 to 151652)      |
| Israel          | 3056 | 0.269 | 519  | 121586 (56332 to 213917)    | 63083 (29227 to 110988)      |
| Italy           | 3916 | 0.345 | 665  | 1221241 (565514 to 2156283) | 811939 (375980 to 1433599)   |
| Kazakhstan      | 855  | 0.075 | 145  | 189759 (95091 to 316181)    | 27545 (13803 to 45897)       |
| Kyrgyzstan      | 350  | 0.031 | 59   | 35263 (16268 to 62264)      | 2095 (967 to 3700)           |
| Latvia          | 2008 | 0.177 | 341  | 44578 (22494 to 73878)      | 15197 (7668 to 25186)        |
| Lithuania       | 2562 | 0.226 | 435  | 62022 (30491 to 101928)     | 26978 (13263 to 44336)       |
| Luxembourg      | 6436 | 0.567 | 1093 | 10125 (4806 to 17412)       | 11064 (5251 to 19026)        |
| Malta           | 4803 | 0.423 | 815  | 8366 (3880 to 14717)        | 6822 (3164 to 12001)         |
| Monaco          | 3479 | 0.307 | 591  | 1087 (522 to 1823)          | 642 (308 to 1077)            |
| Montenegro      | 1840 | 0.162 | 312  | 11517 (5905 to 18387)       | 3598 (1845 to 5744)          |
| Netherlands     | 6217 | 0.548 | 1056 | 332864 (152982 to 579915)   | 351340 (161473 to 612103)    |
| North Macedonia | 1137 | 0.100 | 193  | 34862 (17668 to 57037)      | 6730 (3410 to 11010)         |
| Norway          | 7013 | 0.618 | 1191 | 78580 (35357 to 140709)     | 93561 (42097 to 167534)      |

|                     |      |       |      |                                |                             |
|---------------------|------|-------|------|--------------------------------|-----------------------------|
| Poland              | 2256 | 0.199 | 383  | 784622 (408542 to 1249606)     | 300524 (156478 to 478621)   |
| Portugal            | 3350 | 0.295 | 569  | 215362 (97405 to 385742)       | 122488 (55400 to 219392)    |
| Republic of Moldova | 667  | 0.059 | 113  | 65915 (32956 to 109651)        | 7464 (3732 to 12417)        |
| Romania             | 1819 | 0.160 | 309  | 397953 (210842 to 632656)      | 122898 (65113 to 195380)    |
| Russian Federation  | 1546 | 0.136 | 262  | 2646151 (1259737 to 4565082)   | 694550 (330650 to 1198222)  |
| San Marino          | 4612 | 0.407 | 783  | 692 (333 to 1181)              | 542 (261 to 924)            |
| Serbia              | 1302 | 0.115 | 221  | 174464 (86486 to 279905)       | 38565 (19118 to 61873)      |
| Slovakia            | 2373 | 0.209 | 403  | 104184 (53673 to 167990)       | 41974 (21624 to 67680)      |
| Slovenia            | 3456 | 0.305 | 587  | 45647 (23435 to 73039)         | 26783 (13750 to 42856)      |
| Spain               | 3985 | 0.351 | 677  | 1012743 (423841 to 1934282)    | 685184 (286755 to 1308661)  |
| Sweden              | 6149 | 0.542 | 1044 | 168251 (77567 to 291581)       | 175647 (80976 to 304398)    |
| Switzerland         | 8521 | 0.751 | 1447 | 148527 (67930 to 261127)       | 214870 (98272 to 377765)    |
| Tajikistan          | 251  | 0.022 | 43   | 23506 (9382 to 46122)          | 1002 (400 to 1965)          |
| Turkey              | 1316 | 0.116 | 223  | 1360677 (683969 to 2168981)    | 304012 (152817 to 484608)   |
| Turkmenistan        | 1247 | 0.110 | 212  | 39790 (20218 to 65955)         | 8424 (4280 to 13963)        |
| Ukraine             | 957  | 0.084 | 162  | 851511 (435021 to 1395905)     | 138351 (70681 to 226802)    |
| United Kingdom      | 4960 | 0.437 | 842  | 1505220 (734024 to 2518609)    | 1267537 (618118 to 2120907) |
| Uzbekistan          | 391  | 0.034 | 66   | 186657 (87458 to 326641)       | 12391 (5806 to 21683)       |
| Southeast Asia      | 311  | 0.027 | 53   | 10030775 (4241270 to 18468603) | 524816 (223215 to 961463)   |
| Bangladesh          | 129  | 0.011 | 22   | 493413 (179142 to 1010516)     | 10806 (3923 to 22132)       |
| Bhutan              | 315  | 0.028 | 53   | 4301 (1767 to 7910)            | 230 (95 to 423)             |

|                                        |      |       |     |                                      |                                    |
|----------------------------------------|------|-------|-----|--------------------------------------|------------------------------------|
| India                                  | 253  | 0.022 | 43  | 6893718<br>(2945986 to<br>12599482)  | 296110 (126541<br>to 541193)       |
| Indonesia                              | 373  | 0.033 | 63  | 1308679 (562269<br>to 2380201)       | 82875 (35607 to<br>150731)         |
| Maldives                               | 2145 | 0.189 | 364 | 1916 (786 to<br>3645)                | 698 (286 to<br>1327)               |
| Myanmar                                | 233  | 0.021 | 40  | 226252 (87824 to<br>442249)          | 8950 (3474 to<br>17495)            |
| Nepal                                  | 188  | 0.017 | 32  | 116071 (42750 to<br>229407)          | 3705 (1365 to<br>7322)             |
| Sri Lanka                              | 555  | 0.049 | 94  | 159116 (64945 to<br>292173)          | 14993 (6119 to<br>27530)           |
| Thailand                               | 759  | 0.067 | 129 | 825560 (355314<br>to 1498931)        | 106382 (45786<br>to 193154)        |
| Timor-Leste                            | 226  | 0.020 | 38  | 1748 (485 to<br>4089)                | 67 (19 to 157)                     |
| Western Pacific                        | 1670 | 0.147 | 284 | 19711581<br>(7011087 to<br>39746939) | 4958333<br>(1781632 to<br>9921762) |
| Australia                              | 5398 | 0.476 | 916 | 601563 (304723<br>to 983752)         | 551307 (279266<br>to 901567)       |
| Brunei<br>Darussalam                   | 1454 | 0.128 | 247 | 2984 (1158 to<br>5826)               | 737 (286 to<br>1438)               |
| Cambodia                               | 233  | 0.021 | 40  | 42178 (14851 to<br>88424)            | 1668 (587 to<br>3498)              |
| China                                  | 893  | 0.079 | 152 | 15385544<br>(5402464 to<br>31214066) | 2332617<br>(819073 to<br>4732395)  |
| Cook Islands                           | 1056 | 0.093 | 179 | 425 (222 to 672)                     | 76 (40 to 120)                     |
| Fiji                                   | 498  | 0.044 | 85  | 11887 (5854 to<br>19396)             | 1005 (495 to<br>1640)              |
| Japan                                  | 4787 | 0.422 | 813 | 1699962 (514939<br>to 3619178)       | 1381599<br>(418503 to<br>2941389)  |
| Kiribati                               | 259  | 0.023 | 44  | 792 (340 to 1427)                    | 35 (15 to 63)                      |
| Lao People's<br>Democratic<br>Republic | 202  | 0.018 | 34  | 22450 (8936 to<br>43159)             | 770 (306 to<br>1480)               |
| Malaysia                               | 1200 | 0.106 | 204 | 235040 (111867<br>to 403398)         | 47885 (22791 to<br>82185)          |
| Marshall Islands                       | 499  | 0.044 | 85  | 344 (139 to 646)                     | 29 (12 to 55)                      |

|                                     |      |       |     |                            |                           |
|-------------------------------------|------|-------|-----|----------------------------|---------------------------|
| Micronesia<br>(Federated States of) | 131  | 0.012 | 22  | 991 (473 to 1677)          | 22 (11 to 37)             |
| Mongolia                            | 623  | 0.055 | 106 | 17113 (7742 to 30672)      | 1810 (819 to 3244)        |
| Nauru                               | 1387 | 0.122 | 235 | 63 (29 to 109)             | 15 (7 to 26)              |
| New Zealand                         | 4434 | 0.391 | 753 | 98309 (48551 to 164521)    | 74006 (36549 to 123850)   |
| Niue                                | 849  | 0.075 | 144 | 33 (16 to 54)              | 5 (2 to 8)                |
| Palau                               | 1817 | 0.160 | 308 | 360 (177 to 591)           | 111 (55 to 182)           |
| Papua New Guinea                    | 106  | 0.009 | 18  | 29527 (10197 to 60721)     | 531 (184 to 1093)         |
| Philippines                         | 396  | 0.035 | 67  | 407623 (171506 to 756769)  | 27405 (11531 to 50879)    |
| Republic of Korea                   | 3529 | 0.311 | 599 | 742598 (255799 to 1503425) | 444923 (153260 to 900768) |
| Samoa                               | 319  | 0.028 | 54  | 2089 (1007 to 3505)        | 113 (55 to 190)           |
| Singapore                           | 4645 | 0.409 | 789 | 80376 (35471 to 146568)    | 63386 (27973 to 115586)   |
| Solomon Islands                     | 116  | 0.010 | 20  | 2809 (1119 to 5297)        | 55 (22 to 104)            |
| Tonga                               | 290  | 0.026 | 49  | 1198 (599 to 1935)         | 59 (29 to 95)             |
| Tuvalu                              | 835  | 0.074 | 142 | 110 (47 to 197)            | 16 (7 to 28)              |
| Vanuatu                             | 92   | 0.008 | 16  | 1702 (744 to 3073)         | 27 (12 to 48)             |
| Viet Nam                            | 512  | 0.045 | 87  | 323510 (112118 to 687884)  | 28121 (9746 to 59795)     |

Abbreviation: \$PPP, 2020 purchasing-power parity-adjusted US\$. Values in parentheses represent uncertainty levels derived from the sensitivity analyses.



**eTable 12.** Health-care costs of musculoskeletal disorders attributable to high body mass index borne by sector and location in 2019

| Location                         | The public sector                           |                        | The private sector/third party              |                        | The out-of-pocket sector                    |                        |
|----------------------------------|---------------------------------------------|------------------------|---------------------------------------------|------------------------|---------------------------------------------|------------------------|
|                                  | Amount (uncertainty level, US\$, thousands) | % of health-care costs | Amount (uncertainty level, US\$, thousands) | % of health-care costs | Amount (uncertainty level, US\$, thousands) | % of health-care costs |
| Global                           | 35599675 (17845248 to 59621629)             | 58.9                   | 14534104 (7763985 to 23215316)              | 24.0                   | 10322440 (5057960 to 17570981)              | 17.1                   |
| Africa                           | 237371 (124522 to 384181)                   | 50.5                   | 116234 (60552 to 191245)                    | 24.7                   | 115979 (56644 to 198030)                    | 24.7                   |
| Algeria                          | 66691 (33881 to 107651)                     | 65.0                   | 1539 (782 to 2484)                          | 1.5                    | 34269 (17410 to 55316)                      | 33.4                   |
| Angola                           | 1665 (681 to 3161)                          | 41.2                   | 861 (352 to 1634)                           | 21.3                   | 1515 (620 to 2877)                          | 37.5                   |
| Benin                            | 282 (136 to 490)                            | 22.7                   | 377 (182 to 655)                            | 30.3                   | 584 (282 to 1015)                           | 47.0                   |
| Botswana                         | 4446 (2390 to 7179)                         | 78.5                   | 1036 (557 to 1674)                          | 18.3                   | 176 (94 to 284)                             | 3.1                    |
| Burkina Faso                     | 988 (407 to 1893)                           | 41.8                   | 556 (229 to 1064)                           | 23.5                   | 821 (338 to 1572)                           | 34.7                   |
| Burundi                          | 135 (47 to 288)                             | 33.4                   | 170 (59 to 362)                             | 42.0                   | 100 (35 to 213)                             | 24.7                   |
| Cabo Verde                       | 315 (159 to 534)                            | 65.8                   | 45 (22 to 76)                               | 9.3                    | 119 (60 to 202)                             | 24.9                   |
| Cameroon                         | 199 (101 to 332)                            | 3.4                    | 1410 (717 to 2354)                          | 24.1                   | 4242 (2156 to 7081)                         | 72.5                   |
| Central African Republic         | 15 (5 to 32)                                | 10.6                   | 41 (14 to 88)                               | 29.1                   | 85 (28 to 183)                              | 60.3                   |
| Chad                             | 100 (38 to 197)                             | 17.3                   | 147 (56 to 289)                             | 25.4                   | 331 (127 to 651)                            | 57.2                   |
| Comoros                          | 27 (12 to 50)                               | 16.1                   | 37 (16 to 68)                               | 22.1                   | 103 (45 to 191)                             | 61.8                   |
| Congo                            | 268 (134 to 454)                            | 37.6                   | 118 (59 to 199)                             | 16.5                   | 327 (164 to 554)                            | 45.9                   |
| Democratic Republic of the Congo | 355 (142 to 702)                            | 15.8                   | 1028 (412 to 2031)                          | 45.7                   | 866 (347 to 1711)                           | 38.5                   |

|                   |                      |      |                     |      |                     |      |
|-------------------|----------------------|------|---------------------|------|---------------------|------|
| Equatorial Guinea | 241 (127 to 400)     | 21.3 | 37 (20 to 62)       | 3.3  | 854 (452 to 1418)   | 75.5 |
| Eritrea           | 28 (11 to 54)        | 17.6 | 62 (24 to 120)      | 39.2 | 68 (27 to 132)      | 43.2 |
| Eswatini          | 737 (387 to 1174)    | 50.7 | 563 (296 to 896)    | 38.7 | 154 (81 to 246)     | 10.6 |
| Ethiopia          | 937 (360 to 1880)    | 22.7 | 1627 (625 to 3263)  | 39.4 | 1565 (601 to 3139)  | 37.9 |
| Gabon             | 1251 (631 to 2059)   | 60.3 | 345 (174 to 567)    | 16.6 | 479 (242 to 789)    | 23.1 |
| Gambia            | 81 (38 to 144)       | 27.2 | 148 (69 to 262)     | 49.6 | 69 (32 to 123)      | 23.2 |
| Ghana             | 4061 (2102 to 6751)  | 40.2 | 2384 (1234 to 3964) | 23.6 | 3657 (1893 to 6080) | 36.2 |
| Guinea            | 292 (126 to 546)     | 22.5 | 238 (103 to 444)    | 18.3 | 769 (332 to 1435)   | 59.2 |
| Guinea-Bissau     | 16 (6 to 30)         | 6.4  | 70 (28 to 134)      | 28.4 | 160 (65 to 308)     | 65.2 |
| Ivory Coast       | 1498 (699 to 2653)   | 29.1 | 1730 (807 to 3063)  | 33.6 | 1920 (896 to 3401)  | 37.3 |
| Kenya             | 6389 (3089 to 11190) | 46.0 | 4125 (1995 to 7225) | 29.7 | 3375 (1632 to 5911) | 24.3 |
| Lesotho           | 648 (331 to 1086)    | 43.5 | 636 (325 to 1066)   | 42.7 | 206 (105 to 345)    | 13.8 |
| Liberia           | 175 (87 to 296)      | 16.1 | 320 (160 to 542)    | 29.5 | 591 (295 to 999)    | 54.4 |
| Madagascar        | 366 (150 to 699)     | 32.2 | 401 (164 to 766)    | 35.3 | 369 (151 to 706)    | 32.5 |
| Malawi            | 491 (201 to 935)     | 32.6 | 762 (312 to 1452)   | 50.6 | 254 (104 to 485)    | 16.9 |
| Mali              | 431 (182 to 809)     | 33.6 | 449 (189 to 842)    | 35.0 | 403 (170 to 756)    | 31.4 |
| Mauritania        | 572 (296 to 951)     | 37.5 | 267 (138 to 444)    | 17.5 | 686 (356 to 1141)   | 45.0 |
| Mauritius         | 3128 (1476 to 5369)  | 47.0 | 479 (226 to 822)    | 7.2  | 3041 (1435 to 5220) | 45.7 |
| Mozambique        | 400 (168 to 757)     | 21.3 | 1292 (541 to 2443)  | 68.7 | 188 (79 to 356)     | 10.0 |
| Namibia           | 1799 (956 to 3000)   | 46.9 | 1722 (915 to 2873)  | 44.9 | 314 (167 to 525)    | 8.2  |
| Niger             | 310 (123 to 610)     | 35.7 | 158 (63 to 311)     | 18.2 | 400 (159 to 788)    | 46.1 |

|                             |                                |      |                                |      |                              |      |
|-----------------------------|--------------------------------|------|--------------------------------|------|------------------------------|------|
| Nigeria                     | 7613 (3569 to 13540)           | 15.9 | 6464 (3030 to 11496)           | 13.5 | 33755 (15823 to 60034)       | 70.5 |
| Rwanda                      | 639 (248 to 1253)              | 39.9 | 775 (300 to 1520)              | 48.4 | 187 (73 to 367)              | 11.7 |
| Sao Tome and Principe       | 37 (18 to 63)                  | 47.3 | 27 (13 to 46)                  | 35.1 | 14 (7 to 23)                 | 17.7 |
| Senegal                     | 685 (322 to 1207)              | 25.0 | 655 (308 to 1154)              | 23.9 | 1397 (656 to 2462)           | 51.0 |
| Seychelles                  | 316 (151 to 544)               | 72.7 | 9 (4 to 15)                    | 2.0  | 110 (52 to 189)              | 25.2 |
| Sierra Leone                | 221 (88 to 428)                | 14.0 | 486 (194 to 943)               | 30.8 | 871 (348 to 1689)            | 55.2 |
| South Africa                | 123442 (68087 to 193717)       | 58.8 | 74527 (41107 to 116955)        | 35.5 | 11966 (6600 to 18779)        | 5.7  |
| South Sudan                 | 120 (55 to 217)                | 16.3 | 445 (204 to 802)               | 60.2 | 174 (80 to 313)              | 23.5 |
| Togo                        | 124 (57 to 225)                | 15.1 | 153 (70 to 279)                | 18.7 | 542 (248 to 986)             | 66.2 |
| Uganda                      | 559 (239 to 1048)              | 15.1 | 1726 (738 to 3233)             | 46.6 | 1418 (606 to 2657)           | 38.3 |
| United Republic of Tanzania | 2374 (1127 to 4167)            | 40.9 | 2142 (1017 to 3759)            | 36.9 | 1288 (612 to 2262)           | 22.2 |
| Zambia                      | 1276 (582 to 2311)             | 40.1 | 1582 (722 to 2864)             | 49.7 | 325 (148 to 588)             | 10.2 |
| Zimbabwe                    | 627 (298 to 1105)              | 17.6 | 2066 (980 to 3643)             | 58.0 | 869 (412 to 1532)            | 24.4 |
| The Americas                | 17725102 (9614909 to 27937145) | 51.6 | 12176301 (6661181 to 19073842) | 35.4 | 4443241 (2389295 to 7047604) | 12.9 |
| Antigua and Barbuda         | 238 (116 to 401)               | 58.4 | 70 (34 to 118)                 | 17.2 | 99 (48 to 167)               | 24.3 |
| Argentina                   | 233320 (109572 to 406847)      | 62.4 | 37391 (17560 to 65200)         | 10.0 | 103573 (48640 to 180603)     | 27.7 |
| Bahamas                     | 1933 (980 to 3163)             | 52.0 | 810 (411 to 1326)              | 21.8 | 974 (494 to 1594)            | 26.2 |
| Barbados                    | 763 (378 to 1255)              | 44.8 | 145 (72 to 238)                | 8.5  | 795 (394 to 1308)            | 46.7 |
| Belize                      | 372 (190 to 594)               | 69.9 | 44 (23 to 71)                  | 8.3  | 116 (59 to 185)              | 21.8 |

|                                        |                                  |      |                                 |      |                                 |      |
|----------------------------------------|----------------------------------|------|---------------------------------|------|---------------------------------|------|
| Bolivia<br>(Plurinational<br>State of) | 13388 (6690<br>to 21993)         | 71.2 | 921 (460 to<br>1514)            | 4.9  | 4494 (2246<br>to 7383)          | 23.9 |
| Brazil                                 | 499731<br>(260311 to<br>819154)  | 40.7 | 421149<br>(219378 to<br>690343) | 34.3 | 305732<br>(159257 to<br>501153) | 24.9 |
| Canada                                 | 752100<br>(368524 to<br>1283272) | 70.2 | 159634<br>(78220 to<br>272375)  | 14.9 | 159634<br>(78220 to<br>272375)  | 14.9 |
| Chile                                  | 112195<br>(54469 to<br>190271)   | 50.9 | 35929<br>(17443 to<br>60931)    | 16.3 | 72299<br>(35100 to<br>122611)   | 32.8 |
| Colombia                               | 148741<br>(71822 to<br>250814)   | 71.9 | 27514<br>(13286 to<br>46395)    | 13.3 | 30824<br>(14884 to<br>51977)    | 14.9 |
| Costa Rica                             | 22850 (10907<br>to 38523)        | 72.5 | 1607 (767<br>to 2710)           | 5.1  | 7028 (3355<br>to 11849)         | 22.3 |
| Cuba                                   | 154328<br>(76982 to<br>254368)   | 89.3 | 173 (86 to<br>285)              | 0.1  | 18319<br>(9138 to<br>30194)     | 10.6 |
| Dominica                               | 138 (70 to<br>224)               | 64.5 | 4 (2 to 6)                      | 1.7  | 73 (37 to<br>118)               | 33.9 |
| Dominican<br>Republic                  | 14483 (6734<br>to 24782)         | 44.9 | 3903 (1815<br>to 6678)          | 12.1 | 13838<br>(6434 to<br>23678)     | 42.9 |
| Ecuador                                | 37840 (20556<br>to 57859)        | 61.8 | 4470 (2428<br>to 6834)          | 7.3  | 18920<br>(10278 to<br>28929)    | 30.9 |
| El Salvador                            | 9110 (4263<br>to 15411)          | 63.5 | 1162 (544<br>to 1966)           | 8.1  | 4075 (1907<br>to 6893)          | 28.4 |
| Grenada                                | 129 (65 to<br>216)               | 41.4 | 13 (7 to 22)                    | 4.2  | 170 (85 to<br>284)              | 54.4 |
| Guatemala                              | 7058 (3141<br>to 12703)          | 38.4 | 1029 (458<br>to 1852)           | 5.6  | 10293<br>(4581 to<br>18525)     | 56.0 |
| Guyana                                 | 794 (379 to<br>1354)             | 59.4 | 76 (36 to<br>130)               | 5.7  | 465 (222 to<br>793)             | 34.8 |
| Haiti                                  | 124 (46 to<br>250)               | 11.0 | 515 (192 to<br>1038)            | 45.7 | 488 (182 to<br>984)             | 43.3 |
| Honduras                               | 3127 (1394<br>to 5517)           | 39.2 | 654 (292 to<br>1154)            | 8.2  | 4196 (1871<br>to 7402)          | 52.6 |
| Jamaica                                | 5058 (2630<br>to 8176)           | 65.3 | 1417 (737<br>to 2291)           | 18.3 | 1270 (661<br>to 2053)           | 16.4 |

|                                    |                                   |      |                                   |      |                                 |      |
|------------------------------------|-----------------------------------|------|-----------------------------------|------|---------------------------------|------|
| Mexico                             | 258109<br>(128325 to 427556)      | 49.3 | 45025<br>(22385 to 74584)         | 8.6  | 220414<br>(109584 to 365113)    | 42.1 |
| Nicaragua                          | 4696 (2191 to 8059)               | 60.9 | 355 (166 to 609)                  | 4.6  | 2653 (1238 to 4552)             | 34.4 |
| Panama                             | 19496 (9362 to 32891)             | 66.1 | 1858 (892 to 3135)                | 6.3  | 8141 (3909 to 13734)            | 27.6 |
| Paraguay                           | 8434 (4185 to 14187)              | 46.0 | 2273 (1128 to 3824)               | 12.4 | 7627 (3784 to 12830)            | 41.6 |
| Peru                               | 46078 (21720 to 77272)            | 62.9 | 6593 (3108 to 11056)              | 9.0  | 20585<br>(9703 to 34520)        | 28.1 |
| Saint Kitts and Nevis              | 172 (86 to 285)                   | 49.3 | 15 (8 to 25)                      | 4.4  | 162 (81 to 268)                 | 46.4 |
| Saint Lucia                        | 259 (127 to 427)                  | 47.4 | 34 (17 to 57)                     | 6.3  | 253 (124 to 418)                | 46.3 |
| Saint Vincent and the Grenadines   | 177 (85 to 296)                   | 66.3 | 12 (6 to 21)                      | 4.6  | 78 (37 to 130)                  | 29.1 |
| Suriname                           | 2070 (989 to 3444)                | 72.0 | 342 (163 to 569)                  | 11.9 | 463 (221 to 770)                | 16.1 |
| Trinidad and Tobago                | 5978 (3113 to 9578)               | 46.0 | 923 (481 to 1478)                 | 7.1  | 6095 (3174 to 9765)             | 46.9 |
| United States of America           | 15329517<br>(8429217 to 23910391) | 50.8 | 11406609<br>(6272134 to 17791590) | 37.8 | 3409912<br>(1875003 to 5318650) | 11.3 |
| Uruguay                            | 22452 (10646 to 38776)            | 66.6 | 6034 (2861 to 10422)              | 17.9 | 5225 (2478 to 9024)             | 15.5 |
| Venezuela (Bolivarian Republic of) | 9841 (4643 to 16835)              | 46.0 | 7595 (3583 to 12992)              | 35.5 | 3958 (1867 to 6771)             | 18.5 |
| Eastern Mediterranean              | 795303<br>(423113 to 1270111)     | 53.9 | 191550<br>(102210 to 306277)      | 13.0 | 488393<br>(253645 to 792639)    | 33.1 |
| Afghanistan                        | 660 (313 to 1160)                 | 8.2  | 1006 (478 to 1768)                | 12.5 | 6385 (3029 to 11216)            | 79.3 |
| Bahrain                            | 8399 (4395 to 13319)              | 59.2 | 1575 (824 to 2497)                | 11.1 | 4214 (2205 to 6682)             | 29.7 |
| Djibouti                           | 51 (21 to 97)                     | 53.7 | 21 (9 to 40)                      | 22.2 | 23 (9 to 44)                    | 24.2 |
| Egypt                              | 53529 (28266 to 84496)            | 27.8 | 18292<br>(9659 to 28875)          | 9.5  | 120729<br>(63751 to 190572)     | 62.7 |

|                            |                              |      |                           |      |                             |      |
|----------------------------|------------------------------|------|---------------------------|------|-----------------------------|------|
| Iran (Islamic Republic of) | 145399<br>(76192 to 240113)  | 49.5 | 32311<br>(16932 to 53358) | 11.0 | 116025<br>(60800 to 191605) | 39.5 |
| Iraq                       | 20811 (10431 to 33624)       | 49.4 | 211 (106 to 340)          | 0.5  | 21106<br>(10579 to 34101)   | 50.1 |
| Jordan                     | 14270 (7762 to 22106)        | 51.2 | 5156 (2805 to 7988)       | 18.5 | 8445 (4594 to 13082)        | 30.3 |
| Kuwait                     | 45605 (25464 to 69537)       | 87.0 | 629 (351 to 959)          | 1.2  | 6186 (3454 to 9431)         | 11.8 |
| Lebanon                    | 15568 (7993 to 24952)        | 49.0 | 5560 (2854 to 8911)       | 17.5 | 10643<br>(5464 to 17059)    | 33.5 |
| Libya                      | 17993 (9517 to 28680)        | 63.3 | 0 (0 to 0)                | 0.0  | 10432<br>(5518 to 16628)    | 36.7 |
| Morocco                    | 19157 (9430 to 32133)        | 39.9 | 6386 (3143 to 10711)      | 13.3 | 22469<br>(11060 to 37689)   | 46.8 |
| Oman                       | 13836 (7275 to 22156)        | 86.4 | 1121 (589 to 1795)        | 7.0  | 1057 (556 to 1692)          | 6.6  |
| Pakistan                   | 10140 (4299 to 19243)        | 32.0 | 4500 (1907 to 8539)       | 14.2 | 17048<br>(7227 to 32353)    | 53.8 |
| Qatar                      | 24489 (13412 to 37711)       | 72.8 | 5012 (2745 to 7718)       | 14.9 | 4138 (2266 to 6372)         | 12.3 |
| Saudi Arabia               | 289548<br>(157047 to 455417) | 69.2 | 59834<br>(32453 to 94111) | 14.3 | 69040<br>(37446 to 108589)  | 16.5 |
| Sudan                      | 3863 (1912 to 6526)          | 22.7 | 1702 (842 to 2875)        | 10.0 | 11470<br>(5676 to 19376)    | 67.4 |
| Syrian Arab Republic       | 21721 (10728 to 35778)       | 45.3 | 479 (237 to 790)          | 1.0  | 25749<br>(12718 to 42412)   | 53.7 |
| Tunisia                    | 22296 (11096 to 36535)       | 57.1 | 1952 (972 to 3199)        | 5.0  | 14799<br>(7365 to 24250)    | 37.9 |
| United Arab Emirates       | 67685 (37437 to 106007)      | 52.3 | 45554<br>(25196 to 71347) | 35.2 | 16177<br>(8948 to 25336)    | 12.5 |
| Yemen                      | 285 (124 to 522)             | 10.2 | 248 (108 to 456)          | 8.9  | 2260 (981 to 4149)          | 81.0 |

|                           |                                      |      |                                   |      |                                    |      |
|---------------------------|--------------------------------------|------|-----------------------------------|------|------------------------------------|------|
| Europe                    | 11838002<br>(5823755 to<br>20086348) | 72.6 | 1361900<br>(663331 to<br>2326912) | 8.3  | 3118476<br>(1538070 to<br>5290822) | 19.1 |
| Albania                   | 5350 (2611<br>to 9086)               | 54.0 | 139 (68 to<br>236)                | 1.4  | 4418 (2156<br>to 7504)             | 44.6 |
| Andorra                   | 960 (454 to<br>1670)                 | 69.5 | 240 (114 to<br>418)               | 17.4 | 181 (86 to<br>315)                 | 13.1 |
| Armenia                   | 2074 (1071<br>to 3424)               | 12.4 | 468 (242 to<br>773)               | 2.8  | 14184<br>(7325 to<br>23416)        | 84.8 |
| Austria                   | 195079<br>(93364 to<br>342588)       | 73.0 | 21111<br>(10104 to<br>37075)      | 7.9  | 51041<br>(24428 to<br>89636)       | 19.1 |
| Azerbaijan                | 5476 (2717<br>to 9197)               | 31.7 | 52 (26 to<br>87)                  | 0.3  | 11747<br>(5828 to<br>19729)        | 68.0 |
| Belarus                   | 40332 (20733<br>to 66808)            | 70.4 | 2234 (1149<br>to 3701)            | 3.9  | 14723<br>(7569 to<br>24389)        | 25.7 |
| Belgium                   | 243744<br>(117139 to<br>426250)      | 76.8 | 16186<br>(7779 to<br>28306)       | 5.1  | 57762<br>(27759 to<br>101012)      | 18.2 |
| Bosnia and<br>Herzegovina | 16220 (8129<br>to 27243)             | 68.7 | 449 (225 to<br>753)               | 1.9  | 6941 (3479<br>to 11658)            | 29.4 |
| Bulgaria                  | 46646 (23804<br>to 76511)            | 59.2 | 1497 (764<br>to 2456)             | 1.9  | 30730<br>(15681 to<br>50404)       | 39.0 |
| Croatia                   | 43252 (22337<br>to 70226)            | 81.5 | 3715 (1919<br>to 6032)            | 7.0  | 6103 (3152<br>to 9909)             | 11.5 |
| Cyprus                    | 4967 (2233<br>to 8982)               | 56.0 | 1188 (534<br>to 2149)             | 13.4 | 2714 (1220<br>to 4908)             | 30.6 |
| Czechia                   | 179388<br>(92824 to<br>288236)       | 81.5 | 9685 (5011<br>to 15561)           | 4.4  | 31255<br>(16173 to<br>50220)       | 14.2 |
| Denmark                   | 148156<br>(71314 to<br>258766)       | 83.3 | 4446 (2140<br>to 7766)            | 2.5  | 25256<br>(12157 to<br>44111)       | 14.2 |
| Estonia                   | 16098 (8664<br>to 25921)             | 74.4 | 325 (175 to<br>523)               | 1.5  | 5193 (2795<br>to 8362)             | 24.0 |
| Finland                   | 113304<br>(54891 to<br>193722)       | 80.2 | 3391 (1643<br>to 5797)            | 2.4  | 24582<br>(11909 to<br>42030)       | 17.4 |

|            |                                 |      |                              |      |                              |      |
|------------|---------------------------------|------|------------------------------|------|------------------------------|------|
| France     | 1404298<br>(688866 to 2394688)  | 75.3 | 287200<br>(140884 to 489750) | 15.4 | 173439<br>(85079 to 295758)  | 9.3  |
| Georgia    | 6410 (3218 to 10997)            | 40.8 | 1948 (978 to 3342)           | 12.4 | 7353 (3691 to 12615)         | 46.8 |
| Germany    | 2720028<br>(1360562 to 4559515) | 77.7 | 332565<br>(166349 to 557470) | 9.5  | 448087<br>(224134 to 751117) | 12.8 |
| Greece     | 73667 (35145 to 125609)         | 48.1 | 25577<br>(12202 to 43611)    | 16.7 | 53910<br>(25720 to 91922)    | 35.2 |
| Hungary    | 100095<br>(53800 to 159783)     | 68.0 | 5741 (3086 to 9164)          | 3.9  | 41510<br>(22311 to 66263)    | 28.2 |
| Iceland    | 7478 (3590 to 12879)            | 82.9 | 144 (69 to 249)              | 1.6  | 1398 (671 to 2408)           | 15.5 |
| Ireland    | 115004<br>(56611 to 195305)     | 74.6 | 21120<br>(10396 to 35867)    | 13.7 | 18037<br>(8879 to 30631)     | 11.7 |
| Israel     | 69792 (33052 to 121520)         | 64.8 | 15402<br>(7294 to 26817)     | 14.3 | 22618<br>(10711 to 39381)    | 21.0 |
| Italy      | 912458<br>(424145 to 1617975)   | 73.9 | 34572<br>(16070 to 61304)    | 2.8  | 287690<br>(133729 to 510133) | 23.3 |
| Kazakhstan | 31453 (16328 to 51328)          | 59.9 | 3256 (1690 to 5313)          | 6.2  | 17801<br>(9241 to 29049)     | 33.9 |
| Kyrgyzstan | 2192 (1050 to 3820)             | 51.4 | 102 (49 to 178)              | 2.4  | 1970 (944 to 3434)           | 46.2 |
| Latvia     | 14974 (7851 to 24493)           | 60.6 | 939 (492 to 1536)            | 3.8  | 8822 (4625 to 14429)         | 35.7 |
| Lithuania  | 28167 (14102 to 46506)          | 65.1 | 1168 (585 to 1929)           | 2.7  | 13976<br>(6997 to 23074)     | 32.3 |
| Luxembourg | 15507 (7533 to 26742)           | 85.9 | 812 (395 to 1401)            | 4.5  | 1733 (842 to 2989)           | 9.6  |
| Malta      | 7015 (3301 to 12332)            | 63.1 | 245 (115 to 430)             | 2.2  | 3847 (1810 to 6762)          | 34.6 |
| Monaco     | 834 (407 to 1406)               | 85.0 | 70 (34 to 117)               | 7.1  | 79 (38 to 132)               | 8.0  |
| Montenegro | 3894 (2036 to 6255)             | 60.8 | 38 (20 to 62)                | 0.6  | 2472 (1293 to 3971)          | 38.6 |



|                     |                               |      |                             |      |                              |      |
|---------------------|-------------------------------|------|-----------------------------|------|------------------------------|------|
| Netherlands         | 348395<br>(161661 to 608498)  | 65.9 | 124238<br>(57648 to 216991) | 23.5 | 56039<br>(26003 to 97877)    | 10.6 |
| North Macedonia     | 6944 (3549 to 11412)          | 59.0 | 71 (36 to 116)              | 0.6  | 4755 (2430 to 7814)          | 40.4 |
| Norway              | 126842<br>(58692 to 225314)   | 85.8 | 444 (205 to 788)            | 0.3  | 20549<br>(9508 to 36502)     | 13.9 |
| Poland              | 370034<br>(195382 to 593931)  | 71.4 | 42497<br>(22439 to 68211)   | 8.2  | 105724<br>(55823 to 169695)  | 20.4 |
| Portugal            | 119964<br>(55317 to 213481)   | 60.9 | 17138<br>(7902 to 30497)    | 8.7  | 60081<br>(27704 to 106916)   | 30.5 |
| Republic of Moldova | 7448 (3805 to 12273)          | 59.7 | 574 (293 to 946)            | 4.6  | 4454 (2275 to 7339)          | 35.7 |
| Romania             | 170731<br>(94493 to 270690)   | 80.1 | 2131 (1180 to 3379)         | 1.0  | 40285<br>(22296 to 63871)    | 18.9 |
| Russian Federation  | 756238<br>(385822 to 1261318) | 61.2 | 28421<br>(14500 to 47402)   | 2.3  | 452260<br>(230736 to 754318) | 36.6 |
| San Marino          | 713 (349 to 1210)             | 82.2 | 7 (3 to 12)                 | 0.8  | 147 (72 to 250)              | 17.0 |
| Serbia              | 38584 (19410 to 62272)        | 58.4 | 3039 (1529 to 4905)         | 4.6  | 24445<br>(12298 to 39453)    | 37.0 |
| Slovakia            | 56500 (29379 to 91778)        | 78.8 | 1434 (746 to 2329)          | 2.0  | 13767<br>(7158 to 22362)     | 19.2 |
| Slovenia            | 32257 (16802 to 51850)        | 72.4 | 7129 (3713 to 11458)        | 16.0 | 5213 (2715 to 8379)          | 11.7 |
| Spain               | 702595<br>(313516 to 1295535) | 70.6 | 75633<br>(33750 to 139463)  | 7.6  | 216949<br>(96808 to 400038)  | 21.8 |
| Sweden              | 244237<br>(116403 to 420244)  | 84.9 | 3452 (1645 to 5940)         | 1.2  | 39987<br>(19058 to 68803)    | 13.9 |
| Switzerland         | 114061<br>(53327 to 200444)   | 32.1 | 151371<br>(70770 to 266010) | 42.6 | 89899<br>(42030 to 157982)   | 25.3 |
| Tajikistan          | 586 (245 to 1131)             | 27.3 | 30 (13 to 58)               | 1.4  | 1528 (638 to 2951)           | 71.2 |

|                   |                                   |      |                                |      |                                 |      |
|-------------------|-----------------------------------|------|--------------------------------|------|---------------------------------|------|
| Turkey            | 412102<br>(211949 to<br>654213)   | 77.9 | 27509<br>(14148 to<br>43670)   | 5.2  | 89403<br>(45981 to<br>141928)   | 16.9 |
| Turkmenistan      | 3059 (1586<br>to 5034)            | 18.0 | 884 (458 to<br>1454)           | 5.2  | 13050<br>(6767 to<br>21478)     | 76.8 |
| Ukraine           | 106439<br>(56438 to<br>172702)    | 44.8 | 9741 (5165<br>to 15805)        | 4.1  | 121406<br>(64375 to<br>196989)  | 51.1 |
| United<br>Kingdom | 1634932<br>(806325 to<br>2734462) | 79.5 | 69922<br>(34484 to<br>116946)  | 3.4  | 351665<br>(173436 to<br>588167) | 17.1 |
| Uzbekistan        | 11031 (5425<br>to 18773)          | 41.6 | 212 (104 to<br>361)            | 0.8  | 15300<br>(7525 to<br>26039)     | 57.7 |
| Southeast<br>Asia | 364662<br>(164581 to<br>655243)   | 43.5 | 120119<br>(54178 to<br>216103) | 14.3 | 353402<br>(158103 to<br>639230) | 42.2 |
| Bangladesh        | 3488 (1338<br>to 6978)            | 18.6 | 1631 (626<br>to 3264)          | 8.7  | 13631<br>(5228 to<br>27274)     | 72.7 |
| Bhutan            | 295 (126 to<br>541)               | 73.6 | 35 (15 to<br>64)               | 8.7  | 71 (30 to<br>131)               | 17.8 |
| India             | 143912<br>(64651 to<br>259259)    | 32.8 | 54406<br>(24441 to<br>98013)   | 12.4 | 240438<br>(108014 to<br>433152) | 54.8 |
| Indonesia         | 80731 (37842<br>to 142957)        | 48.9 | 26910<br>(12614 to<br>47652)   | 16.3 | 57453<br>(26931 to<br>101736)   | 34.8 |
| Maldives          | 1114 (480 to<br>2085)             | 79.3 | 56 (24 to<br>105)              | 4.0  | 232 (100 to<br>434)             | 16.5 |
| Myanmar           | 2490 (1020<br>to 4748)            | 15.8 | 1308 (536<br>to 2494)          | 8.3  | 11976<br>(4904 to<br>22837)     | 76.0 |
| Nepal             | 1692 (669 to<br>3290)             | 24.8 | 1180 (467<br>to 2295)          | 17.3 | 3950 (1562<br>to 7681)          | 57.9 |
| Sri Lanka         | 11555 (5019<br>to 20620)          | 47.2 | 1763 (766<br>to 3145)          | 7.2  | 11163<br>(4849 to<br>19921)     | 45.6 |
| Thailand          | 119311<br>(53414 to<br>214593)    | 71.7 | 32781<br>(14676 to<br>58961)   | 19.7 | 14477<br>(6481 to<br>26038)     | 8.7  |
| Timor-Leste       | 75 (22 to<br>172)                 | 55.9 | 48 (14 to<br>110)              | 35.9 | 11 (3 to 25)                    | 8.2  |

|                                  |                                 |      |                               |      |                                |      |
|----------------------------------|---------------------------------|------|-------------------------------|------|--------------------------------|------|
| Western Pacific                  | 4639235<br>(1694369 to 9288601) | 66.2 | 568000<br>(222533 to 1100936) | 8.1  | 1802949<br>(662203 to 3602656) | 25.7 |
| Australia                        | 635477<br>(330076 to 1032682)   | 71.7 | 109015<br>(56624 to 177155)   | 12.3 | 141808<br>(73657 to 230445)    | 16.0 |
| Brunei Darussalam                | 1160 (454 to 2260)              | 94.3 | 0 (0 to 0)                    | 0.0  | 70 (27 to 137)                 | 5.7  |
| Cambodia                         | 793 (295 to 1627)               | 24.3 | 369 (137 to 756)              | 11.3 | 2101 (782 to 4311)             | 64.4 |
| China                            | 1727697<br>(614068 to 3506298)  | 56.0 | 271495<br>(96496 to 550990)   | 8.8  | 1085981<br>(385985 to 2203959) | 35.2 |
| Cook Islands                     | 111 (59 to 173)                 | 87.6 | 8 (4 to 12)                   | 6.0  | 8 (4 to 13)                    | 6.4  |
| Fiji                             | 1162 (599 to 1864)              | 65.4 | 380 (196 to 610)              | 21.4 | 235 (121 to 376)               | 13.2 |
| Japan                            | 1661297<br>(506338 to 3569775)  | 83.9 | 63363<br>(19312 to 136154)    | 3.2  | 255432<br>(77852 to 548869)    | 12.9 |
| Kiribati                         | 58 (26 to 101)                  | 82.3 | 12 (6 to 22)                  | 17.6 | 0.070<br>(0.032 to 0.123)      | 0.1  |
| Lao People's Democratic Republic | 567 (237 to 1054)               | 36.9 | 326 (136 to 605)              | 21.2 | 642 (269 to 1193)              | 41.8 |
| Malaysia                         | 46240 (23188 to 78050)          | 52.2 | 11693<br>(5864 to 19737)      | 13.2 | 30649<br>(15370 to 51734)      | 34.6 |
| Marshall Islands                 | 23 (10 to 43)                   | 41.2 | 27 (11 to 49)                 | 47.1 | 7 (3 to 12)                    | 11.7 |
| Micronesia (Federated States of) | 12 (6 to 20)                    | 28.3 | 29 (14 to 48)                 | 68.8 | 1 (1 to 2)                     | 2.9  |
| Mongolia                         | 2165 (1024 to 3827)             | 56.6 | 329 (156 to 582)              | 8.6  | 1331 (630 to 2353)             | 34.8 |
| Nauru                            | 28 (13 to 47)                   | 86.3 | 4 (2 to 7)                    | 12.5 | 0.351<br>(0.169 to 0.595)      | 1.1  |
| New Zealand                      | 91150 (46112 to 151829)         | 75.6 | 14709<br>(7441 to 24502)      | 12.2 | 14709<br>(7441 to 24502)       | 12.2 |

|                   |                              |      |                            |      |                             |      |
|-------------------|------------------------------|------|----------------------------|------|-----------------------------|------|
| Niue              | 8 (4 to 13)                  | 98.7 | 0 (0 to 0)                 | 0.0  | 0.104<br>(0.053 to 0.166)   | 1.3  |
| Palau             | 84 (43 to 137)               | 45.0 | 81 (41 to 131)             | 43.1 | 22 (11 to 37)               | 12.0 |
| Papua New Guinea  | 655 (239 to 1326)            | 57.7 | 368 (134 to 745)           | 32.4 | 112 (41 to 228)             | 9.9  |
| Philippines       | 23818 (10530 to 42677)       | 40.6 | 6336 (2801 to 11352)       | 10.8 | 28511<br>(12605 to 51086)   | 48.6 |
| Republic of Korea | 379107<br>(132485 to 766476) | 59.5 | 64990<br>(22712 to 131396) | 10.2 | 192421<br>(67244 to 389035) | 30.2 |
| Samoa             | 158 (80 to 260)              | 72.6 | 38 (19 to 62)              | 17.2 | 22 (11 to 36)               | 10.1 |
| Singapore         | 45157 (20335 to 81750)       | 50.2 | 17631<br>(7940 to 31919)   | 19.6 | 27166<br>(12234 to 49181)   | 30.2 |
| Solomon Islands   | 88 (37 to 162)               | 74.7 | 26 (11 to 47)              | 21.8 | 4 (2 to 7)                  | 3.4  |
| Tonga             | 64 (34 to 102)               | 58.1 | 35 (19 to 56)              | 32.1 | 11 (6 to 17)                | 9.9  |
| Tuvalu            | 21 (10 to 37)                | 74.3 | 7 (3 to 13)                | 25.4 | 0.086<br>(0.039 to 0.150)   | 0.3  |
| Vanuatu           | 32 (15 to 57)                | 57.0 | 19 (9 to 34)               | 34.4 | 5 (2 to 9)                  | 8.5  |
| Viet Nam          | 22103 (8051 to 45954)        | 43.8 | 6712 (2445 to 13954)       | 13.3 | 21700<br>(7904 to 45114)    | 43.0 |

Values in parentheses represent uncertainty levels derived from the sensitivity analyses.

**eTable 13.** Health-care, morbidity-related, and total costs of musculoskeletal disorders attributable to high body mass index by World Bank income group in 2019

|              | Health-care costs       |            | Morbidity-related costs  |            | Total costs              |
|--------------|-------------------------|------------|--------------------------|------------|--------------------------|
|              | Amount (US\$, millions) | % of total | Amount (US\$, millions)  | % of total | Amount (US\$, millions)  |
| Global       | 60485 (30683 to 100453) | 33.5       | 120233 (53073 to 232665) | 66.5       | 180718 (83757 to 333118) |
| High         | 49832 (25802 to 81534)  | 33.3       | 99684 (45114 to 189572)  | 66.7       | 149516 (70916 to 271106) |
| Upper-middle | 9068 (4125 to 16180)    | 34.7       | 17074 (6574 to 35994)    | 65.3       | 26143 (10699 to 52174)   |
| Lower-middle | 1477 (706 to 2552)      | 30.6       | 3351 (1340 to 6837)      | 69.4       | 4829 (2046 to 9389)      |
| Low          | 107 (50 to 187)         | 46.5       | 123 (46 to 262)          | 53.5       | 230 (96 to 449)          |

Values in parentheses represent uncertainty levels derived from the sensitivity analyses. The percentage calculations were based on the mean values.

## eReferences

1. Institute for Health Metrics and Evaluation. GBD results tool. Accessed April 15, 2022. <https://ghdx.healthdata.org/gbd-results-tool>
2. Cieza A, Causey K, Kamenov K, Hanson SW, Chatterji S, Vos T. Global estimates of the need for rehabilitation based on the Global Burden of Disease Study 2019: a systematic analysis for the Global Burden of Disease Study 2019. *Lancet*. 2021;396(10267):2006-2017. doi:10.1016/s0140-6736(20)32340-0
3. GBD 2019 Diseases and Injuries Collaborators. Global burden of 369 diseases and injuries in 204 countries and territories, 1990-2019: a systematic analysis for the Global Burden of Disease Study 2019. *Lancet*. 2020;396(10258):1204-1222. doi:10.1016/s0140-6736(20)30925-9
4. World Health Organization. WHO global health expenditure database. Accessed December 20, 2021. <https://apps.who.int/nha/database/Select/Indicators/en>
5. The World Bank Group. World development indicators. Accessed December 25, 2021. <https://databank.worldbank.org/source/world-development-indicators>
6. International Labour Office Department of Statistics. Labour force by sex and age. Accessed March 10, 2022. [https://www.ilo.org/shinyapps/bulkexplorer41/?lang=en&segment=indicator&id=EAP\\_TEAP\\_SEX\\_AGE\\_NB\\_A](https://www.ilo.org/shinyapps/bulkexplorer41/?lang=en&segment=indicator&id=EAP_TEAP_SEX_AGE_NB_A)
7. United Nations Department of Economics and Social Affairs Population Dynamics. World population prospects 2019. Accessed October 15, 2021. <https://population.un.org/wpp/Download/Standard/Population/>
8. International Labour Office Department of Statistics. Statistics on the working-age population and labour force. Accessed April 4, 2022. <https://ilostat.ilo.org/topics/population-and-labour-force/#>
9. Statistics Niue. Population. Accessed September 16, 2022. <https://niue.prism.spc.int/category/population/>
10. International Labour Office Department of Statistics. Statistics on labour income and inequality. Accessed March 2, 2022. <https://ilostat.ilo.org/topics/labour-income/>
11. Moher D, Liberati A, Tetzlaff J, Altman DG. Preferred reporting items for systematic reviews and meta-analyses: the PRISMA statement. *PLoS Med*. 2009;6(7):e1000097. doi:10.1371/journal.pmed.1000097
12. Dieleman JL, Cao J, Chapin A, et al. US health care spending by payer and health condition, 1996-2016. *JAMA*. 2020;323(9):863-884. doi:10.1001/jama.2020.0734
13. The Economist Intelligence Unit. Breakaway: The global burden of cancer—challenges and opportunities. Accessed November 1, 2022. [https://graphics.eiu.com/upload/eb/EIU\\_LIVESTRONG\\_Global\\_Cancer\\_Burden.pdf](https://graphics.eiu.com/upload/eb/EIU_LIVESTRONG_Global_Cancer_Burden.pdf)
14. World Economic Forum and the Harvard School of Public Health. The global economic burden of non-communicable diseases. Accessed March 5, 2022. [https://www3.weforum.org/docs/WEF\\_Harvard\\_HE\\_GlobalEconomicBurdenNonCommunicableDiseases\\_2011.pdf](https://www3.weforum.org/docs/WEF_Harvard_HE_GlobalEconomicBurdenNonCommunicableDiseases_2011.pdf)
15. Ding D, Lawson KD, Kolbe-Alexander TL, et al. The economic burden of physical inactivity: a global analysis of major non-communicable diseases. *Lancet*.

- 2016;388(10051):1311-1324. doi:10.1016/s0140-6736(16)30383-x
16. Dieleman JL, Baral R, Birger M, et al. US spending on personal health care and public health, 1996-2013. *JAMA*. 2016;316(24):2627-2646. doi:10.1001/jama.2016.16885
  17. Ebata-Kogure N, Murakami A, Nozawa K, et al. Treatment and healthcare cost among patients with hip or knee osteoarthritis: a cross-sectional study using a real-world claims database in Japan between 2013 and 2019. *Clin Drug Investig*. 2020;40(11):1071-1084. doi:10.1007/s40261-020-00968-6
  18. Lee YR, Cho B, Jo MW, et al. Measuring the economic burden of disease and injury in Korea, 2015. *J Korean Med Sci*. 2019;34(Suppl 1):e80. doi:10.3346/jkms.2019.34.e80
  19. Olafsson G, Jonsson E, Fritzell P, Hägg O, Borgström F. Cost of low back pain: results from a national register study in Sweden. *Eur Spine J*. 2018;27(11):2875-2881. doi:10.1007/s00586-018-5742-6
  20. Alonso-García M, Sarría-Santamera A. The economic and social burden of low back pain in Spain: a national assessment of the economic and social impact of low back pain in Spain. *Spine (Phila Pa 1976)*. 2020;45(16):E1026-e1032. doi:10.1097/brs.0000000000003476
  21. Zhao X, Shah D, Gandhi K, et al. Clinical, humanistic, and economic burden of osteoarthritis among noninstitutionalized adults in the United States. *Osteoarthritis Cartilage*. 2019;27(11):1618-1626. doi:10.1016/j.joca.2019.07.002
  22. Fisher S, Bellinger DC, Cropper ML, et al. Air pollution and development in Africa: impacts on health, the economy, and human capital. *Lancet Planet Health*. 2021;5(10):e681-e688. doi:10.1016/s2542-5196(21)00201-1
  23. Kanal D, Kornegay JT. Accounting for household production in the national accounts: an update, 1965–2017. Accessed February 16, 2022. <https://apps.bea.gov/scb/2019/06-june/0619-household-production.htm>
  24. Global Burden of Disease 2020 Health Financing Collaborator Network. Tracking development assistance for health and for COVID-19: a review of development assistance, government, out-of-pocket, and other private spending on health for 204 countries and territories, 1990-2050. *Lancet*. 2021;398(10308):1317-1343. doi:10.1016/s0140-6736(21)01258-7
  25. Health and economic impact of air pollution in the states of India: the Global Burden of Disease Study 2019. *Lancet Planet Health*. 2021;5(1):e25-e38. doi:10.1016/s2542-5196(20)30298-9
  26. Ahn YJ, Shin JS, Lee J, et al. Evaluation of use and cost of medical care of common lumbar disorders in Korea: cross-sectional study of Korean health insurance review and assessment service national patient sample data. *BMJ Open*. 2016;6(9):e012432. doi:10.1136/bmjopen-2016-012432
  27. Flores NM, Nuevo J, Klein AB, Baumgartner S, Morlock R. The economic burden of uncontrolled gout: how controlling gout reduces cost. *J Med Econ*. 2019;22(1):1-6. doi:10.1080/13696998.2018.1532904
  28. Williams EM, Walker RJ, Faith T, Egede LE. The impact of arthritis and joint pain on individual healthcare expenditures: findings from the Medical Expenditure Panel

- Survey (MEPS), 2011. *Arthritis Res Ther.* 2017;19(1):38. doi:10.1186/s13075-017-1230-3
- 29.** Eriksson JK, Johansson K, Askling J, Neovius M. Costs for hospital care, drugs and lost work days in incident and prevalent rheumatoid arthritis: how large, and how are they distributed? *Ann Rheum Dis.* 2015;74(4):648-654. doi:10.1136/annrheumdis-2013-204080
- 30.** Kalkan A, Hallert E, Bernfort L, Husberg M, Carlsson P. Costs of rheumatoid arthritis during the period 1990-2010: a register-based cost-of-illness study in Sweden. *Rheumatology (Oxford).* 2014;53(1):153-160. doi:10.1093/rheumatology/ket290
- 31.** Huscher D, Mittendorf T, von Hinüber U, et al. Evolution of cost structures in rheumatoid arthritis over the past decade. *Ann Rheum Dis.* 2015;74(4):738-745. doi:10.1136/annrheumdis-2013-204311
- 32.** Kinge JM, Sælensminde K, Dieleman J, Vollset SE, Norheim OF. Economic losses and burden of disease by medical conditions in Norway. *Health Policy.* 2017;121(6):691-698. doi:10.1016/j.healthpol.2017.03.020
- 33.** GBD 2019 Risk Factors Collaborators. Global burden of 87 risk factors in 204 countries and territories, 1990-2019: a systematic analysis for the Global Burden of Disease Study 2019. *Lancet.* 2020;396(10258):1223-1249. doi:10.1016/s0140-6736(20)30752-2
