# Supplementary material for: Health and Economic Outcomes Associated With Musculoskeletal Disorders Attributable to High Body Mass Index in 192 Countries and Territories in 2019
Source: PubMed Central journal article supplement (PMC9860530; doi:10.1001/jamanetworkopen.2022.50674), 2023-01-20
Supplement: jamanetwopen-e2250674-s002.pdf [file jamanetwopen-e2250674-s002.pdf]

## Data Sharing Statement

Chen. Health and Economic Outcomes Associated With Musculoskeletal Disorders Attributable to High Body Mass Index in 192 Countries and Territories in 2019. *JAMA Netw Open*. Published January 20, 2023. doi:10.1001/jamanetworkopen.2022.50674

### Data

**Data available:** Yes

**Data types:** Deidentified participant data

**How to access data:** All data we used for this work are publicly available. We provided information in the reference list.

**When available:** With publication

### Supporting Documents

**Document types:** None

### Additional Information

**Who can access the data:** Researchers whose proposed use of the data has been approved.

**Types of analyses:** For the research purpose.

**Mechanisms of data availability:** After approval of a proposal.
